# Supplementary material
Source: publisher figshare collection journal article supplement (https://acs.figshare.com/ndownloader/files/4097800)
Supplement: Supplementary file 1 [file 4097800]

complex 1 

data_100549lt_0m 
 
_audit_creation_method            SHELXL-97 
_chemical_name_systematic 
; 
 ? 
; 
_chemical_name_common             ? 
_chemical_melting_point           ? 
_chemical_formula_moiety          ? 
_chemical_formula_sum 
 'C36 H30 Fe0.50 N3 O6 P2' 
_chemical_formula_weight          690.49 
 
loop_ 
 _atom_type_symbol 
 _atom_type_description 
 _atom_type_scat_dispersion_real 
 _atom_type_scat_dispersion_imag 
 _atom_type_scat_source 
 'C'  'C'   0.0033   0.0016 
 'International Tables Vol C Tables 4.2.6.8 and 6.1.1.4' 
 'H'  'H'   0.0000   0.0000 
 'International Tables Vol C Tables 4.2.6.8 and 6.1.1.4' 
 'N'  'N'   0.0061   0.0033 
 'International Tables Vol C Tables 4.2.6.8 and 6.1.1.4' 
 'O'  'O'   0.0106   0.0060 
 'International Tables Vol C Tables 4.2.6.8 and 6.1.1.4' 
 'P'  'P'   0.1023   0.0942 
 'International Tables Vol C Tables 4.2.6.8 and 6.1.1.4' 
 'Fe'  'Fe'   0.3463   0.8444 
 'International Tables Vol C Tables 4.2.6.8 and 6.1.1.4' 
 
_symmetry_cell_setting            monoclinic
_symmetry_space_group_name_H-M   'C 1 2/c 1'
_symmetry_space_group_name_hall  '-C 2yc'
 
loop_ 
 _symmetry_equiv_pos_as_xyz 
 'x, y, z' 
 '-x, y, -z+1/2' 
 'x+1/2, y+1/2, z' 
 '-x+1/2, y+1/2, -z+1/2' 
 '-x, -y, -z' 
 'x, -y, z-1/2' 
 '-x+1/2, -y+1/2, -z' 
 'x+1/2, -y+1/2, z-1/2' 
 
_cell_length_a                    16.6357(4) 
_cell_length_b                    20.3175(4) 
_cell_length_c                    20.8288(5) 
_cell_angle_alpha                 90.00 
_cell_angle_beta                  109.8290(10) 
_cell_angle_gamma                 90.00 
_cell_volume                      6622.6(3) 
_cell_formula_units_Z             8 
_cell_measurement_temperature     100(2) 
_cell_measurement_reflns_used     9896
_cell_measurement_theta_min       2.2770
_cell_measurement_theta_max       26.3456
 
_exptl_crystal_description        Lump 
_exptl_crystal_colour             orange
_exptl_crystal_size_max           0.28
_exptl_crystal_size_mid           0.25
_exptl_crystal_size_min           0.25
_exptl_crystal_density_meas       'not measured'  
_exptl_crystal_density_diffrn     1.385 
_exptl_crystal_density_method     'not measured' 
_exptl_crystal_F_000              2864 
_exptl_absorpt_coefficient_mu     0.393 
_exptl_absorpt_correction_type    multi-scan 
_exptl_absorpt_correction_T_min   0.7052  
_exptl_absorpt_correction_T_max   0.7454 
_exptl_absorpt_process_details    'SADABS V2008/1 (Bruker AXS)' 
 
_exptl_special_details 
; 
 ? 
; 
 
_diffrn_ambient_temperature       100(2) 
_diffrn_radiation_wavelength      0.71073 
_diffrn_radiation_type            MoK\a 
_diffrn_radiation_source          'fine-focus sealed tube' 
_diffrn_radiation_monochromator   graphite 
_diffrn_measurement_device_type   'Bruker APEX-II CCD'
_diffrn_measurement_method        '\f and \w scans'
_diffrn_detector_area_resol_mean  8.3333 
_diffrn_reflns_number             29394 
_diffrn_reflns_av_R_equivalents   0.0213 
_diffrn_reflns_av_sigmaI/netI     0.0193 
_diffrn_reflns_limit_h_min        -20 
_diffrn_reflns_limit_h_max        20 
_diffrn_reflns_limit_k_min        -25 
_diffrn_reflns_limit_k_max        18 
_diffrn_reflns_limit_l_min        -25 
_diffrn_reflns_limit_l_max        25 
_diffrn_reflns_theta_min          1.64 
_diffrn_reflns_theta_max          26.36 
_reflns_number_total              6763 
_reflns_number_gt                 6137 
_reflns_threshold_expression      >2sigma(I) 
 
_computing_data_collection        'APEX2 (Bruker AXS, 2010)'
_computing_cell_refinement        'SAINT V7.34A (Bruker AXS, 2006)'
_computing_data_reduction         'SAINT V7.34A (Bruker AXS, 2006)'
_computing_structure_solution     'SHELXS-97 (Sheldrick, 2008)'
_computing_structure_refinement   'SHELXL-97 (Sheldrick, 2008)'
_computing_molecular_graphics     'SHELXTL (Sheldrick, 2008)'
_computing_publication_material   'SHELXTL'
 
_refine_special_details 
; 
 Refinement of F^2^ against ALL reflections.  The weighted R-factor wR and 
 goodness of fit S are based on F^2^, conventional R-factors R are based 
 on F, with F set to zero for negative F^2^. The threshold expression of 
 F^2^ > 2sigma(F^2^) is used only for calculating R-factors(gt) etc. and is 
 not relevant to the choice of reflections for refinement.  R-factors based 
 on F^2^ are statistically about twice as large as those based on F, and R- 
 factors based on ALL data will be even larger. 
; 
 
_refine_ls_structure_factor_coef  Fsqd  
_refine_ls_matrix_type            full 
_refine_ls_weighting_scheme       calc  
_refine_ls_weighting_details 
 'calc w=1/[\s^2^(Fo^2^)+(0.0767P)^2^+3.9646P] where P=(Fo^2^+2Fc^2^)/3' 
_atom_sites_solution_primary      direct 
_atom_sites_solution_secondary    difmap 
_atom_sites_solution_hydrogens    geom 
_refine_ls_hydrogen_treatment     constr
_refine_ls_extinction_method      none 
_refine_ls_extinction_coef        ? 
_refine_ls_number_reflns          6763 
_refine_ls_number_parameters      429 
_refine_ls_number_restraints      0 
_refine_ls_R_factor_all           0.0370 
_refine_ls_R_factor_gt            0.0289 
_refine_ls_wR_factor_ref          0.1209 
_refine_ls_wR_factor_gt           0.0944 
_refine_ls_goodness_of_fit_ref    1.162 
_refine_ls_restrained_S_all       1.162 
_refine_ls_shift/su_max           0.001 
_refine_ls_shift/su_mean          0.000 
 
loop_ 
 _atom_site_label 
 _atom_site_type_symbol 
 _atom_site_fract_x 
 _atom_site_fract_y 
 _atom_site_fract_z 
 _atom_site_U_iso_or_equiv 
 _atom_site_adp_type 
 _atom_site_occupancy 
 _atom_site_symmetry_multiplicity 
 _atom_site_calc_flag 
 _atom_site_refinement_flags 
 _atom_site_disorder_assembly 
 _atom_site_disorder_group 
Fe1 Fe 0.0000 0.049903(16) 0.2500 0.01559(11) Uani 1 2 d S . . 
P1 P 0.94753(3) 0.347995(19) 0.54697(2) 0.01137(12) Uani 1 1 d . . . 
P2 P 0.97777(3) 0.301199(19) 0.42447(2) 0.01166(12) Uani 1 1 d . . . 
N1 N 0.95261(9) 0.35241(7) 0.47254(7) 0.0147(3) Uani 1 1 d . . . 
N2 N -0.10716(9) -0.00359(7) 0.30449(8) 0.0209(3) Uani 1 1 d . . . 
N3 N 0.11863(9) 0.10147(7) 0.35836(8) 0.0190(3) Uani 1 1 d . . . 
O1 O -0.06064(8) -0.03533(6) 0.27810(7) 0.0246(3) Uani 1 1 d . . . 
O2 O -0.15806(9) -0.03160(7) 0.32639(8) 0.0323(3) Uani 1 1 d . . . 
O3 O -0.09869(9) 0.05830(6) 0.30602(7) 0.0259(3) Uani 1 1 d . . . 
O4 O 0.06296(8) 0.13464(6) 0.31206(6) 0.0203(3) Uani 1 1 d . . . 
O5 O 0.11284(8) 0.03963(6) 0.35186(7) 0.0244(3) Uani 1 1 d . . . 
O6 O 0.17437(8) 0.12860(7) 0.40526(7) 0.0282(3) Uani 1 1 d . . . 
C1 C 0.85451(10) 0.39235(8) 0.54885(8) 0.0132(3) Uani 1 1 d . . . 
C2 C 0.82703(11) 0.44690(8) 0.50585(9) 0.0159(3) Uani 1 1 d . . . 
H2 H 0.8554 0.4584 0.4748 0.019 Uiso 1 1 calc R . . 
C3 C 0.75826(11) 0.48422(8) 0.50868(9) 0.0195(4) Uani 1 1 d . . . 
H3 H 0.7391 0.5210 0.4793 0.023 Uiso 1 1 calc R . . 
C4 C 0.71763(11) 0.46743(9) 0.55476(10) 0.0207(4) Uani 1 1 d . . . 
H4 H 0.6709 0.4931 0.5568 0.025 Uiso 1 1 calc R . . 
C5 C 0.74456(11) 0.41356(9) 0.59776(9) 0.0187(4) Uani 1 1 d . . . 
H5 H 0.7164 0.4026 0.6291 0.022 Uiso 1 1 calc R . . 
C6 C 0.81302(10) 0.37570(8) 0.59484(9) 0.0155(3) Uani 1 1 d . . . 
H6 H 0.8315 0.3387 0.6240 0.019 Uiso 1 1 calc R . . 
C7 C 1.03801(10) 0.38829(7) 0.60816(8) 0.0132(3) Uani 1 1 d . . . 
C8 C 1.10478(11) 0.41212(8) 0.58844(9) 0.0166(3) Uani 1 1 d . . . 
H8 H 1.1031 0.4070 0.5427 0.020 Uiso 1 1 calc R . . 
C9 C 1.17397(11) 0.44342(8) 0.63615(9) 0.0189(4) Uani 1 1 d . . . 
H9 H 1.2195 0.4597 0.6228 0.023 Uiso 1 1 calc R . . 
C10 C 1.17655(11) 0.45089(8) 0.70291(9) 0.0189(4) Uani 1 1 d . . . 
H10 H 1.2240 0.4721 0.7354 0.023 Uiso 1 1 calc R . . 
C11 C 1.10978(11) 0.42739(9) 0.72250(9) 0.0186(4) Uani 1 1 d . . . 
H11 H 1.1116 0.4327 0.7683 0.022 Uiso 1 1 calc R . . 
C12 C 1.04087(11) 0.39634(8) 0.67542(9) 0.0161(3) Uani 1 1 d . . . 
H12 H 0.9953 0.3804 0.6889 0.019 Uiso 1 1 calc R . . 
C13 C 0.93994(10) 0.26653(8) 0.57816(8) 0.0136(3) Uani 1 1 d . . . 
C14 C 1.00425(11) 0.23855(8) 0.63265(9) 0.0205(4) Uani 1 1 d . . . 
H14 H 1.0543 0.2632 0.6558 0.025 Uiso 1 1 calc R . . 
C15 C 0.99572(12) 0.17462(9) 0.65353(10) 0.0242(4) Uani 1 1 d . . . 
H15 H 1.0400 0.1557 0.6907 0.029 Uiso 1 1 calc R . . 
C16 C 0.92282(12) 0.13854(8) 0.62016(10) 0.0209(4) Uani 1 1 d . . . 
H16 H 0.9168 0.0951 0.6347 0.025 Uiso 1 1 calc R . . 
C17 C 0.85853(11) 0.16597(8) 0.56534(9) 0.0185(4) Uani 1 1 d . . . 
H17 H 0.8087 0.1411 0.5424 0.022 Uiso 1 1 calc R . . 
C18 C 0.86684(10) 0.22947(8) 0.54401(9) 0.0159(3) Uani 1 1 d . . . 
H18 H 0.8230 0.2479 0.5062 0.019 Uiso 1 1 calc R . . 
C19 C 0.88262(10) 0.26792(8) 0.36226(8) 0.0142(3) Uani 1 1 d . . . 
C20 C 0.88674(11) 0.21630(8) 0.31924(9) 0.0168(3) Uani 1 1 d . . . 
H20 H 0.9399 0.1957 0.3245 0.020 Uiso 1 1 calc R . . 
C21 C 0.81270(11) 0.19525(8) 0.26872(9) 0.0197(4) Uani 1 1 d . . . 
H21 H 0.8150 0.1600 0.2395 0.024 Uiso 1 1 calc R . . 
C22 C 0.73552(11) 0.22562(9) 0.26093(10) 0.0237(4) Uani 1 1 d . . . 
H22 H 0.6851 0.2110 0.2262 0.028 Uiso 1 1 calc R . . 
C23 C 0.73087(12) 0.27712(10) 0.30328(10) 0.0256(4) Uani 1 1 d . . . 
H23 H 0.6776 0.2977 0.2975 0.031 Uiso 1 1 calc R . . 
C24 C 0.80441(11) 0.29838(9) 0.35402(9) 0.0201(4) Uani 1 1 d . . . 
H24 H 0.8016 0.3336 0.3832 0.024 Uiso 1 1 calc R . . 
C25 C 1.04657(10) 0.23637(8) 0.47040(8) 0.0144(3) Uani 1 1 d . . . 
C26 C 1.13077(11) 0.25397(8) 0.50853(9) 0.0172(3) Uani 1 1 d . . . 
H26 H 1.1512 0.2967 0.5038 0.021 Uiso 1 1 calc R . . 
C27 C 1.18428(12) 0.20914(9) 0.55322(9) 0.0220(4) Uani 1 1 d . . . 
H27 H 1.2412 0.2212 0.5792 0.026 Uiso 1 1 calc R . . 
C28 C 1.15445(12) 0.14660(9) 0.55994(10) 0.0243(4) Uani 1 1 d . . . 
H28 H 1.1908 0.1161 0.5909 0.029 Uiso 1 1 calc R . . 
C29 C 1.07147(12) 0.12856(9) 0.52145(10) 0.0236(4) Uani 1 1 d . . . 
H29 H 1.0517 0.0855 0.5258 0.028 Uiso 1 1 calc R . . 
C30 C 1.01719(11) 0.17294(8) 0.47664(9) 0.0187(4) Uani 1 1 d . . . 
H30 H 0.9605 0.1604 0.4504 0.022 Uiso 1 1 calc R . . 
C31 C 1.03517(10) 0.34512(8) 0.37890(8) 0.0134(3) Uani 1 1 d . . . 
C32 C 1.03716(11) 0.41373(8) 0.38036(9) 0.0186(4) Uani 1 1 d . . . 
H32 H 1.0077 0.4373 0.4049 0.022 Uiso 1 1 calc R . . 
C33 C 1.08263(13) 0.44729(9) 0.34562(10) 0.0236(4) Uani 1 1 d . . . 
H33 H 1.0850 0.4940 0.3471 0.028 Uiso 1 1 calc R . . 
C34 C 1.12454(12) 0.41301(9) 0.30891(9) 0.0217(4) Uani 1 1 d . . . 
H34 H 1.1553 0.4363 0.2851 0.026 Uiso 1 1 calc R . . 
C35 C 1.12178(11) 0.34468(9) 0.30675(9) 0.0182(4) Uani 1 1 d . . . 
H35 H 1.1504 0.3214 0.2813 0.022 Uiso 1 1 calc R . . 
C36 C 1.07740(11) 0.31036(8) 0.34170(9) 0.0162(3) Uani 1 1 d . . . 
H36 H 1.0757 0.2636 0.3404 0.019 Uiso 1 1 calc R . . 
 
loop_ 
 _atom_site_aniso_label 
 _atom_site_aniso_U_11 
 _atom_site_aniso_U_22 
 _atom_site_aniso_U_33 
 _atom_site_aniso_U_23 
 _atom_site_aniso_U_13 
 _atom_site_aniso_U_12 
Fe1 0.01619(19) 0.01199(18) 0.0203(2) 0.000 0.00833(15) 0.000 
P1 0.0114(2) 0.0110(2) 0.0114(2) 0.00001(15) 0.00342(16) 0.00029(14) 
P2 0.0117(2) 0.0115(2) 0.0117(2) 0.00004(15) 0.00379(16) 0.00076(14) 
N1 0.0170(7) 0.0141(7) 0.0134(7) 0.0001(5) 0.0056(6) 0.0021(5) 
N2 0.0185(7) 0.0226(8) 0.0239(8) 0.0101(6) 0.0102(6) 0.0059(6) 
N3 0.0180(7) 0.0233(8) 0.0172(7) -0.0011(6) 0.0079(6) 0.0032(6) 
O1 0.0244(7) 0.0199(6) 0.0359(8) 0.0059(6) 0.0184(6) 0.0059(5) 
O2 0.0306(8) 0.0340(8) 0.0417(9) 0.0165(7) 0.0245(7) 0.0036(6) 
O3 0.0296(7) 0.0184(6) 0.0344(8) 0.0054(6) 0.0167(6) 0.0052(5) 
O4 0.0197(6) 0.0196(6) 0.0202(6) 0.0014(5) 0.0053(5) 0.0047(5) 
O5 0.0267(7) 0.0178(6) 0.0279(7) 0.0022(5) 0.0082(6) 0.0042(5) 
O6 0.0240(7) 0.0349(8) 0.0217(7) -0.0093(6) 0.0023(6) 0.0010(6) 
C1 0.0117(7) 0.0124(7) 0.0146(8) -0.0021(6) 0.0033(6) 0.0000(6) 
C2 0.0173(8) 0.0141(8) 0.0167(8) 0.0011(6) 0.0061(7) -0.0009(6) 
C3 0.0210(9) 0.0144(8) 0.0212(9) 0.0024(7) 0.0047(7) 0.0041(7) 
C4 0.0176(8) 0.0200(8) 0.0241(9) -0.0031(7) 0.0067(7) 0.0043(7) 
C5 0.0168(8) 0.0224(8) 0.0187(9) -0.0011(7) 0.0085(7) 0.0005(7) 
C6 0.0150(8) 0.0157(8) 0.0150(8) 0.0013(6) 0.0042(6) 0.0005(6) 
C7 0.0126(7) 0.0110(7) 0.0154(8) 0.0000(6) 0.0039(6) 0.0016(6) 
C8 0.0173(8) 0.0171(8) 0.0165(8) -0.0002(6) 0.0069(7) 0.0002(6) 
C9 0.0141(8) 0.0184(8) 0.0251(9) 0.0000(7) 0.0078(7) -0.0017(6) 
C10 0.0143(8) 0.0167(8) 0.0223(9) -0.0036(7) 0.0017(7) -0.0002(6) 
C11 0.0205(9) 0.0202(8) 0.0146(8) -0.0030(7) 0.0052(7) 0.0007(7) 
C12 0.0158(8) 0.0169(8) 0.0165(8) -0.0006(6) 0.0065(7) -0.0007(6) 
C13 0.0149(8) 0.0119(7) 0.0148(8) -0.0001(6) 0.0062(6) 0.0011(6) 
C14 0.0189(9) 0.0156(8) 0.0214(9) -0.0003(7) -0.0004(7) -0.0014(7) 
C15 0.0262(9) 0.0176(9) 0.0219(9) 0.0049(7) -0.0008(7) 0.0025(7) 
C16 0.0274(9) 0.0128(8) 0.0237(9) 0.0014(7) 0.0101(8) -0.0007(7) 
C17 0.0168(8) 0.0166(8) 0.0234(9) -0.0031(7) 0.0085(7) -0.0031(6) 
C18 0.0140(8) 0.0176(8) 0.0160(8) 0.0000(6) 0.0050(6) 0.0010(6) 
C19 0.0135(8) 0.0156(8) 0.0134(8) 0.0010(6) 0.0043(6) -0.0009(6) 
C20 0.0155(8) 0.0147(8) 0.0199(9) 0.0003(7) 0.0058(7) 0.0006(6) 
C21 0.0206(9) 0.0162(8) 0.0200(9) -0.0021(7) 0.0038(7) -0.0015(7) 
C22 0.0162(8) 0.0262(9) 0.0235(10) -0.0024(8) -0.0002(7) -0.0038(7) 
C23 0.0139(8) 0.0309(10) 0.0295(10) -0.0020(8) 0.0039(7) 0.0042(7) 
C24 0.0168(8) 0.0228(9) 0.0202(9) -0.0026(7) 0.0057(7) 0.0035(7) 
C25 0.0153(8) 0.0154(8) 0.0137(8) 0.0015(6) 0.0063(6) 0.0044(6) 
C26 0.0164(8) 0.0184(8) 0.0174(8) 0.0015(7) 0.0065(7) 0.0017(7) 
C27 0.0166(8) 0.0276(9) 0.0205(9) 0.0034(7) 0.0045(7) 0.0040(7) 
C28 0.0245(9) 0.0246(9) 0.0237(10) 0.0087(8) 0.0081(8) 0.0102(7) 
C29 0.0268(10) 0.0156(8) 0.0304(10) 0.0065(7) 0.0123(8) 0.0047(7) 
C30 0.0184(8) 0.0167(8) 0.0216(9) 0.0006(7) 0.0077(7) 0.0019(7) 
C31 0.0112(7) 0.0159(8) 0.0116(8) 0.0013(6) 0.0019(6) -0.0003(6) 
C32 0.0228(9) 0.0163(8) 0.0190(9) 0.0000(7) 0.0102(7) 0.0019(7) 
C33 0.0308(10) 0.0147(8) 0.0283(10) 0.0022(7) 0.0138(8) -0.0011(7) 
C34 0.0236(9) 0.0224(9) 0.0219(9) 0.0042(7) 0.0114(7) -0.0027(7) 
C35 0.0179(8) 0.0215(8) 0.0168(8) -0.0008(7) 0.0078(7) 0.0008(7) 
C36 0.0158(8) 0.0158(8) 0.0169(8) -0.0015(6) 0.0053(7) -0.0006(6) 
 
_geom_special_details 
; 
 All esds (except the esd in the dihedral angle between two l.s. planes) 
 are estimated using the full covariance matrix.  The cell esds are taken 
 into account individually in the estimation of esds in distances, angles 
 and torsion angles; correlations between esds in cell parameters are only 
 used when they are defined by crystal symmetry.  An approximate (isotropic) 
 treatment of cell esds is used for estimating esds involving l.s. planes. 
; 
 
loop_ 
 _geom_bond_atom_site_label_1 
 _geom_bond_atom_site_label_2 
 _geom_bond_distance 
 _geom_bond_site_symmetry_2 
 _geom_bond_publ_flag 
Fe1 O1 2.1815(13) . ? 
Fe1 O1 2.1815(13) 2 ? 
Fe1 O4 2.1940(13) . ? 
Fe1 O4 2.1940(13) 2 ? 
Fe1 O5 2.3166(13) 2 ? 
Fe1 O5 2.3166(13) . ? 
Fe1 O3 2.3206(13) . ? 
Fe1 O3 2.3207(13) 2 ? 
P1 N1 1.5836(14) . ? 
P1 C13 1.7982(16) . ? 
P1 C1 1.8025(16) . ? 
P1 C7 1.8051(17) . ? 
P2 N1 1.5952(14) . ? 
P2 C25 1.7936(16) . ? 
P2 C31 1.7955(17) . ? 
P2 C19 1.8029(17) . ? 
N2 O2 1.229(2) . ? 
N2 O3 1.2644(19) . ? 
N2 O1 1.267(2) . ? 
N3 O6 1.226(2) . ? 
N3 O5 1.2639(19) . ? 
N3 O4 1.2791(19) . ? 
C1 C6 1.399(2) . ? 
C1 C2 1.401(2) . ? 
C2 C3 1.390(2) . ? 
C2 H2 0.9500 . ? 
C3 C4 1.391(3) . ? 
C3 H3 0.9500 . ? 
C4 C5 1.389(3) . ? 
C4 H4 0.9500 . ? 
C5 C6 1.393(2) . ? 
C5 H5 0.9500 . ? 
C6 H6 0.9500 . ? 
C7 C12 1.395(2) . ? 
C7 C8 1.395(2) . ? 
C8 C9 1.393(2) . ? 
C8 H8 0.9500 . ? 
C9 C10 1.385(3) . ? 
C9 H9 0.9500 . ? 
C10 C11 1.391(3) . ? 
C10 H10 0.9500 . ? 
C11 C12 1.382(2) . ? 
C11 H11 0.9500 . ? 
C12 H12 0.9500 . ? 
C13 C14 1.390(2) . ? 
C13 C18 1.402(2) . ? 
C14 C15 1.392(2) . ? 
C14 H14 0.9500 . ? 
C15 C16 1.385(3) . ? 
C15 H15 0.9500 . ? 
C16 C17 1.389(3) . ? 
C16 H16 0.9500 . ? 
C17 C18 1.387(2) . ? 
C17 H17 0.9500 . ? 
C18 H18 0.9500 . ? 
C19 C20 1.396(2) . ? 
C19 C24 1.398(2) . ? 
C20 C21 1.389(2) . ? 
C20 H20 0.9500 . ? 
C21 C22 1.384(3) . ? 
C21 H21 0.9500 . ? 
C22 C23 1.388(3) . ? 
C22 H22 0.9500 . ? 
C23 C24 1.387(3) . ? 
C23 H23 0.9500 . ? 
C24 H24 0.9500 . ? 
C25 C30 1.400(2) . ? 
C25 C26 1.402(2) . ? 
C26 C27 1.388(2) . ? 
C26 H26 0.9500 . ? 
C27 C28 1.388(3) . ? 
C27 H27 0.9500 . ? 
C28 C29 1.390(3) . ? 
C28 H28 0.9500 . ? 
C29 C30 1.389(3) . ? 
C29 H29 0.9500 . ? 
C30 H30 0.9500 . ? 
C31 C32 1.394(2) . ? 
C31 C36 1.401(2) . ? 
C32 C33 1.390(3) . ? 
C32 H32 0.9500 . ? 
C33 C34 1.385(3) . ? 
C33 H33 0.9500 . ? 
C34 C35 1.389(2) . ? 
C34 H34 0.9500 . ? 
C35 C36 1.388(2) . ? 
C35 H35 0.9500 . ? 
C36 H36 0.9500 . ? 
 
loop_ 
 _geom_angle_atom_site_label_1 
 _geom_angle_atom_site_label_2 
 _geom_angle_atom_site_label_3 
 _geom_angle 
 _geom_angle_site_symmetry_1 
 _geom_angle_site_symmetry_3 
 _geom_angle_publ_flag 
O1 Fe1 O1 74.92(7) . 2 ? 
O1 Fe1 O4 129.54(5) . . ? 
O1 Fe1 O4 127.53(5) 2 . ? 
O1 Fe1 O4 127.53(5) . 2 ? 
O1 Fe1 O4 129.54(5) 2 2 ? 
O4 Fe1 O4 76.61(6) . 2 ? 
O1 Fe1 O5 82.49(5) . 2 ? 
O1 Fe1 O5 89.29(5) 2 2 ? 
O4 Fe1 O5 133.38(5) . 2 ? 
O4 Fe1 O5 56.95(4) 2 2 ? 
O1 Fe1 O5 89.29(5) . . ? 
O1 Fe1 O5 82.50(5) 2 . ? 
O4 Fe1 O5 56.94(4) . . ? 
O4 Fe1 O5 133.38(5) 2 . ? 
O5 Fe1 O5 169.66(6) 2 . ? 
O1 Fe1 O3 56.85(5) . . ? 
O1 Fe1 O3 131.57(5) 2 . ? 
O4 Fe1 O3 85.64(5) . . ? 
O4 Fe1 O3 87.75(5) 2 . ? 
O5 Fe1 O3 88.59(5) 2 . ? 
O5 Fe1 O3 92.17(5) . . ? 
O1 Fe1 O3 131.57(5) . 2 ? 
O1 Fe1 O3 56.84(5) 2 2 ? 
O4 Fe1 O3 87.75(5) . 2 ? 
O4 Fe1 O3 85.63(5) 2 2 ? 
O5 Fe1 O3 92.17(5) 2 2 ? 
O5 Fe1 O3 88.59(5) . 2 ? 
O3 Fe1 O3 171.57(6) . 2 ? 
N1 P1 C13 116.07(7) . . ? 
N1 P1 C1 108.92(7) . . ? 
C13 P1 C1 106.64(7) . . ? 
N1 P1 C7 110.91(8) . . ? 
C13 P1 C7 107.84(7) . . ? 
C1 P1 C7 105.92(7) . . ? 
N1 P2 C25 113.58(8) . . ? 
N1 P2 C31 107.90(8) . . ? 
C25 P2 C31 106.82(8) . . ? 
N1 P2 C19 110.02(8) . . ? 
C25 P2 C19 110.72(8) . . ? 
C31 P2 C19 107.53(7) . . ? 
P1 N1 P2 133.63(9) . . ? 
O2 N2 O3 122.41(15) . . ? 
O2 N2 O1 121.63(15) . . ? 
O3 N2 O1 115.95(14) . . ? 
O6 N3 O5 122.81(15) . . ? 
O6 N3 O4 121.49(15) . . ? 
O5 N3 O4 115.69(14) . . ? 
N2 O1 Fe1 96.81(10) . . ? 
N2 O3 Fe1 90.35(10) . . ? 
N3 O4 Fe1 96.30(10) . . ? 
N3 O5 Fe1 90.99(9) . . ? 
C6 C1 C2 119.96(15) . . ? 
C6 C1 P1 121.37(12) . . ? 
C2 C1 P1 118.56(13) . . ? 
C3 C2 C1 119.94(16) . . ? 
C3 C2 H2 120.0 . . ? 
C1 C2 H2 120.0 . . ? 
C2 C3 C4 119.67(16) . . ? 
C2 C3 H3 120.2 . . ? 
C4 C3 H3 120.2 . . ? 
C5 C4 C3 120.82(16) . . ? 
C5 C4 H4 119.6 . . ? 
C3 C4 H4 119.6 . . ? 
C4 C5 C6 119.80(16) . . ? 
C4 C5 H5 120.1 . . ? 
C6 C5 H5 120.1 . . ? 
C5 C6 C1 119.80(15) . . ? 
C5 C6 H6 120.1 . . ? 
C1 C6 H6 120.1 . . ? 
C12 C7 C8 119.70(15) . . ? 
C12 C7 P1 119.90(12) . . ? 
C8 C7 P1 120.40(13) . . ? 
C9 C8 C7 119.75(16) . . ? 
C9 C8 H8 120.1 . . ? 
C7 C8 H8 120.1 . . ? 
C10 C9 C8 120.19(16) . . ? 
C10 C9 H9 119.9 . . ? 
C8 C9 H9 119.9 . . ? 
C9 C10 C11 120.07(16) . . ? 
C9 C10 H10 120.0 . . ? 
C11 C10 H10 120.0 . . ? 
C12 C11 C10 120.07(16) . . ? 
C12 C11 H11 120.0 . . ? 
C10 C11 H11 120.0 . . ? 
C11 C12 C7 120.23(15) . . ? 
C11 C12 H12 119.9 . . ? 
C7 C12 H12 119.9 . . ? 
C14 C13 C18 119.33(15) . . ? 
C14 C13 P1 122.85(13) . . ? 
C18 C13 P1 117.78(12) . . ? 
C13 C14 C15 120.31(16) . . ? 
C13 C14 H14 119.8 . . ? 
C15 C14 H14 119.8 . . ? 
C16 C15 C14 120.11(16) . . ? 
C16 C15 H15 119.9 . . ? 
C14 C15 H15 119.9 . . ? 
C15 C16 C17 119.93(16) . . ? 
C15 C16 H16 120.0 . . ? 
C17 C16 H16 120.0 . . ? 
C18 C17 C16 120.27(16) . . ? 
C18 C17 H17 119.9 . . ? 
C16 C17 H17 119.9 . . ? 
C17 C18 C13 120.05(16) . . ? 
C17 C18 H18 120.0 . . ? 
C13 C18 H18 120.0 . . ? 
C20 C19 C24 120.01(15) . . ? 
C20 C19 P2 121.38(12) . . ? 
C24 C19 P2 118.42(13) . . ? 
C21 C20 C19 119.59(15) . . ? 
C21 C20 H20 120.2 . . ? 
C19 C20 H20 120.2 . . ? 
C22 C21 C20 120.05(16) . . ? 
C22 C21 H21 120.0 . . ? 
C20 C21 H21 120.0 . . ? 
C21 C22 C23 120.76(16) . . ? 
C21 C22 H22 119.6 . . ? 
C23 C22 H22 119.6 . . ? 
C24 C23 C22 119.62(16) . . ? 
C24 C23 H23 120.2 . . ? 
C22 C23 H23 120.2 . . ? 
C23 C24 C19 119.96(16) . . ? 
C23 C24 H24 120.0 . . ? 
C19 C24 H24 120.0 . . ? 
C30 C25 C26 119.69(15) . . ? 
C30 C25 P2 123.08(13) . . ? 
C26 C25 P2 116.68(12) . . ? 
C27 C26 C25 120.19(16) . . ? 
C27 C26 H26 119.9 . . ? 
C25 C26 H26 119.9 . . ? 
C26 C27 C28 119.89(17) . . ? 
C26 C27 H27 120.1 . . ? 
C28 C27 H27 120.1 . . ? 
C27 C28 C29 120.15(17) . . ? 
C27 C28 H28 119.9 . . ? 
C29 C28 H28 119.9 . . ? 
C30 C29 C28 120.57(17) . . ? 
C30 C29 H29 119.7 . . ? 
C28 C29 H29 119.7 . . ? 
C29 C30 C25 119.50(17) . . ? 
C29 C30 H30 120.3 . . ? 
C25 C30 H30 120.3 . . ? 
C32 C31 C36 120.22(15) . . ? 
C32 C31 P2 119.89(13) . . ? 
C36 C31 P2 119.88(12) . . ? 
C33 C32 C31 119.49(16) . . ? 
C33 C32 H32 120.3 . . ? 
C31 C32 H32 120.3 . . ? 
C34 C33 C32 120.37(16) . . ? 
C34 C33 H33 119.8 . . ? 
C32 C33 H33 119.8 . . ? 
C33 C34 C35 120.21(16) . . ? 
C33 C34 H34 119.9 . . ? 
C35 C34 H34 119.9 . . ? 
C36 C35 C34 120.18(16) . . ? 
C36 C35 H35 119.9 . . ? 
C34 C35 H35 119.9 . . ? 
C35 C36 C31 119.52(16) . . ? 
C35 C36 H36 120.2 . . ? 
C31 C36 H36 120.2 . . ? 
 
_diffrn_measured_fraction_theta_max    0.997 
_diffrn_reflns_theta_full              26.36 
_diffrn_measured_fraction_theta_full   0.997 
_refine_diff_density_max    0.632 
_refine_diff_density_min   -0.723 
_refine_diff_density_rms    0.206 


complex 1  ===END


complex 2
 
data_100411lt_0m 
 
_audit_creation_method            SHELXL-97 
_chemical_name_systematic 
; 
 ? 
; 
_chemical_name_common             ? 
_chemical_melting_point           ? 
_chemical_formula_moiety          ? 
_chemical_formula_sum 
 'C72 H60 Fe N7 O13 P4' 
_chemical_formula_weight          1411.00 
 
loop_ 
 _atom_type_symbol 
 _atom_type_description 
 _atom_type_scat_dispersion_real 
 _atom_type_scat_dispersion_imag 
 _atom_type_scat_source 
 'C'  'C'   0.0033   0.0016 
 'International Tables Vol C Tables 4.2.6.8 and 6.1.1.4' 
 'H'  'H'   0.0000   0.0000 
 'International Tables Vol C Tables 4.2.6.8 and 6.1.1.4' 
 'N'  'N'   0.0061   0.0033 
 'International Tables Vol C Tables 4.2.6.8 and 6.1.1.4' 
 'O'  'O'   0.0106   0.0060 
 'International Tables Vol C Tables 4.2.6.8 and 6.1.1.4' 
 'P'  'P'   0.1023   0.0942 
 'International Tables Vol C Tables 4.2.6.8 and 6.1.1.4' 
 'Fe'  'Fe'   0.3463   0.8444 
 'International Tables Vol C Tables 4.2.6.8 and 6.1.1.4' 
 
_symmetry_cell_setting            orthorhombic
_symmetry_space_group_name_H-M   'P 21 21 21'
_symmetry_space_group_name_hall  'P 2ac 2ab'
 
loop_ 
 _symmetry_equiv_pos_as_xyz 
 'x, y, z' 
 '-x+1/2, -y, z+1/2' 
 '-x, y+1/2, -z+1/2' 
 'x+1/2, -y+1/2, -z' 
 
_cell_length_a                    17.1157(7) 
_cell_length_b                    19.5781(8) 
_cell_length_c                    19.9696(8) 
_cell_angle_alpha                 90.00 
_cell_angle_beta                  90.00 
_cell_angle_gamma                 90.00 
_cell_volume                      6691.7(5) 
_cell_formula_units_Z             4 
_cell_measurement_temperature     100(2) 
_cell_measurement_reflns_used     9943
_cell_measurement_theta_min       2.2897
_cell_measurement_theta_max       25.4471
 
_exptl_crystal_description        Lump
_exptl_crystal_colour             Colorless
_exptl_crystal_size_max           0.25
_exptl_crystal_size_mid           0.20
_exptl_crystal_size_min           0.20
_exptl_crystal_density_meas       'not measured'
_exptl_crystal_density_diffrn     1.401 
_exptl_crystal_density_method     'not measured' 
_exptl_crystal_F_000              2924 
_exptl_absorpt_coefficient_mu     0.392 
_exptl_absorpt_correction_type    multi-scan
_exptl_absorpt_correction_T_min   0.7019  
_exptl_absorpt_correction_T_max   0.7454 
_exptl_absorpt_process_details    'SADABS V2008/1 (Bruker AXS)'
 
_exptl_special_details 
; 
 ? 
; 
 
_diffrn_ambient_temperature       100(2) 
_diffrn_radiation_wavelength      0.71073 
_diffrn_radiation_type            MoK\a 
_diffrn_radiation_source          'fine-focus sealed tube' 
_diffrn_radiation_monochromator   graphite 
_diffrn_measurement_device_type   'Bruker APEX-II CCD'
_diffrn_measurement_method        '\f and \w scans'
_diffrn_detector_area_resol_mean  8.3333
_diffrn_reflns_number             69873 
_diffrn_reflns_av_R_equivalents   0.0372 
_diffrn_reflns_av_sigmaI/netI     0.0325 
_diffrn_reflns_limit_h_min        -21 
_diffrn_reflns_limit_h_max        21 
_diffrn_reflns_limit_k_min        -23 
_diffrn_reflns_limit_k_max        24 
_diffrn_reflns_limit_l_min        -24 
_diffrn_reflns_limit_l_max        24 
_diffrn_reflns_theta_min          1.46 
_diffrn_reflns_theta_max          26.41 
_reflns_number_total              13708 
_reflns_number_gt                 12405 
_reflns_threshold_expression      >2sigma(I) 
 
_computing_data_collection        'APEX2 (Bruker AXS, 2010)'
_computing_cell_refinement        'SAINT V7.34A (Bruker AXS, 2006)'
_computing_data_reduction         'SAINT V7.34A (Bruker AXS, 2006)'
_computing_structure_solution     'SHELXS-97 (Sheldrick, 2008)'
_computing_structure_refinement   'SHELXL-97 (Sheldrick, 2008)'
_computing_molecular_graphics     'SHELXTL (Sheldrick, 2008)'
_computing_publication_material   'SHELXTL'
 
 
_refine_special_details 
; 
 Refinement of F^2^ against ALL reflections.  The weighted R-factor wR and 
 goodness of fit S are based on F^2^, conventional R-factors R are based 
 on F, with F set to zero for negative F^2^. The threshold expression of 
 F^2^ > 2sigma(F^2^) is used only for calculating R-factors(gt) etc. and is 
 not relevant to the choice of reflections for refinement.  R-factors based 
 on F^2^ are statistically about twice as large as those based on F, and R- 
 factors based on ALL data will be even larger. 
; 
 
_refine_ls_structure_factor_coef  Fsqd  
_refine_ls_matrix_type            full 
_refine_ls_weighting_scheme       calc  
_refine_ls_weighting_details 
 'calc w=1/[\s^2^(Fo^2^)+(0.0879P)^2^+2.5679P] where P=(Fo^2^+2Fc^2^)/3' 
_atom_sites_solution_primary      direct 
_atom_sites_solution_secondary    difmap 
_atom_sites_solution_hydrogens    geom 
_refine_ls_hydrogen_treatment     constr 
_refine_ls_extinction_method      none 
_refine_ls_extinction_coef        ? 
_refine_ls_abs_structure_details 
 'Flack H D (1983), Acta Cryst. A39, 876-881' 
_refine_ls_abs_structure_Flack    0.300(17) 
_refine_ls_number_reflns          13708 
_refine_ls_number_parameters      894 
_refine_ls_number_restraints      8 
_refine_ls_R_factor_all           0.0565 
_refine_ls_R_factor_gt            0.0465 
_refine_ls_wR_factor_ref          0.1400 
_refine_ls_wR_factor_gt           0.1239 
_refine_ls_goodness_of_fit_ref    1.091 
_refine_ls_restrained_S_all       1.092 
_refine_ls_shift/su_max           0.001 
_refine_ls_shift/su_mean          0.000 
 
loop_ 
 _atom_site_label 
 _atom_site_type_symbol 
 _atom_site_fract_x 
 _atom_site_fract_y 
 _atom_site_fract_z 
 _atom_site_U_iso_or_equiv 
 _atom_site_adp_type 
 _atom_site_occupancy 
 _atom_site_symmetry_multiplicity 
 _atom_site_calc_flag 
 _atom_site_refinement_flags 
 _atom_site_disorder_assembly 
 _atom_site_disorder_group 
Fe1 Fe 0.76387(3) 0.25564(3) 0.76346(3) 0.04074(15) Uani 1 1 d . . . 
P1 P 0.79354(4) 0.87200(4) 0.62975(4) 0.01972(16) Uani 1 1 d . . . 
P2 P 0.85775(4) 0.99725(4) 0.56434(4) 0.02113(16) Uani 1 1 d . . . 
P3 P 0.83731(5) 0.49260(4) 0.42871(4) 0.02142(16) Uani 1 1 d . . . 
P4 P 0.77011(5) 0.37523(4) 0.35178(4) 0.02007(16) Uani 1 1 d . . . 
N1 N 0.81365(16) 0.92753(13) 0.57570(13) 0.0254(6) Uani 1 1 d . . . 
N2 N 0.78683(16) 0.42814(13) 0.40885(13) 0.0246(6) Uani 1 1 d . . . 
N3 N 0.89469(19) 0.32113(18) 0.75588(16) 0.0410(8) Uani 1 1 d . . . 
N4 N 0.69270(16) 0.32477(14) 0.64127(14) 0.0285(6) Uani 1 1 d . . . 
N6 N 0.80434(18) 0.15077(17) 0.86879(16) 0.0402(7) Uani 1 1 d . . . 
O1 O 0.88341(15) 0.26737(14) 0.72165(14) 0.0409(6) Uani 1 1 d . A . 
O2 O 0.83835(18) 0.33875(14) 0.79396(14) 0.0454(7) Uani 1 1 d . A . 
O3 O 0.95599(19) 0.35332(17) 0.75293(17) 0.0617(9) Uani 1 1 d . A . 
O4 O 0.74976(19) 0.32173(16) 0.68175(17) 0.0600(9) Uani 1 1 d . A . 
O5 O 0.6949(2) 0.35881(18) 0.59153(15) 0.0619(9) Uani 1 1 d . A . 
O6 O 0.6342(2) 0.2928(3) 0.6575(3) 0.114(2) Uani 1 1 d . A . 
O10 O 0.83191(15) 0.19909(14) 0.83071(14) 0.0408(6) Uani 1 1 d . A . 
O11 O 0.7346(2) 0.1446(2) 0.8749(3) 0.1037(18) Uani 1 1 d . A . 
O12 O 0.85164(16) 0.11270(13) 0.89616(12) 0.0377(6) Uani 1 1 d . A . 
C1 C 0.85843(18) 0.79992(16) 0.62507(15) 0.0218(6) Uani 1 1 d . . . 
C2 C 0.83118(19) 0.73347(16) 0.62182(16) 0.0269(7) Uani 1 1 d . . . 
H2 H 0.7766 0.7248 0.6213 0.032 Uiso 1 1 calc R . . 
C3 C 0.8839(2) 0.67907(18) 0.61931(18) 0.0326(7) Uani 1 1 d . . . 
H3 H 0.8652 0.6335 0.6169 0.039 Uiso 1 1 calc R . . 
C4 C 0.9632(2) 0.69171(18) 0.62041(15) 0.0283(7) Uani 1 1 d . . . 
H4 H 0.9989 0.6546 0.6190 0.034 Uiso 1 1 calc R . . 
C5 C 0.9910(2) 0.7571(2) 0.62355(19) 0.0350(8) Uani 1 1 d . . . 
H5 H 1.0457 0.7652 0.6246 0.042 Uiso 1 1 calc R . . 
C6 C 0.9392(2) 0.81145(18) 0.6253(2) 0.0356(8) Uani 1 1 d . . . 
H6 H 0.9586 0.8569 0.6266 0.043 Uiso 1 1 calc R . . 
C7 C 0.79387(18) 0.90276(16) 0.71490(15) 0.0229(6) Uani 1 1 d . . . 
C8 C 0.8364(2) 0.87237(19) 0.76526(17) 0.0314(7) Uani 1 1 d . . . 
H8 H 0.8696 0.8347 0.7557 0.038 Uiso 1 1 calc R . . 
C9 C 0.8304(2) 0.8975(2) 0.83071(18) 0.0411(9) Uani 1 1 d . . . 
H9 H 0.8587 0.8762 0.8659 0.049 Uiso 1 1 calc R . . 
C10 C 0.7835(2) 0.9533(2) 0.84417(18) 0.0400(9) Uani 1 1 d . . . 
H10 H 0.7802 0.9705 0.8886 0.048 Uiso 1 1 calc R . . 
C11 C 0.7410(2) 0.9844(2) 0.79321(18) 0.0404(9) Uani 1 1 d . . . 
H11 H 0.7088 1.0228 0.8024 0.049 Uiso 1 1 calc R . . 
C12 C 0.7466(2) 0.95863(17) 0.72907(17) 0.0309(7) Uani 1 1 d . . . 
H12A H 0.7177 0.9794 0.6940 0.037 Uiso 1 1 calc R . . 
C13 C 0.69559(17) 0.84167(15) 0.61419(15) 0.0205(6) Uani 1 1 d . . . 
C14 C 0.66446(19) 0.85022(15) 0.55032(16) 0.0243(6) Uani 1 1 d . . . 
H14 H 0.6940 0.8718 0.5160 0.029 Uiso 1 1 calc R . . 
C15 C 0.58923(19) 0.82663(17) 0.53766(18) 0.0301(7) Uani 1 1 d . . . 
H15 H 0.5669 0.8327 0.4945 0.036 Uiso 1 1 calc R . . 
C16 C 0.54714(19) 0.79469(19) 0.5868(2) 0.0350(8) Uani 1 1 d . . . 
H16 H 0.4960 0.7785 0.5772 0.042 Uiso 1 1 calc R . . 
C17 C 0.5780(2) 0.78574(18) 0.65013(19) 0.0326(7) Uani 1 1 d . . . 
H17 H 0.5483 0.7633 0.6837 0.039 Uiso 1 1 calc R . . 
C18 C 0.65305(19) 0.80986(16) 0.66465(17) 0.0285(7) Uani 1 1 d . . . 
H18 H 0.6746 0.8046 0.7082 0.034 Uiso 1 1 calc R . . 
C19 C 0.91789(19) 1.02448(16) 0.63270(15) 0.0242(6) Uani 1 1 d . . . 
C20 C 0.99165(19) 0.99585(18) 0.64017(17) 0.0314(7) Uani 1 1 d . . . 
H20 H 1.0113 0.9659 0.6068 0.038 Uiso 1 1 calc R . . 
C21 C 1.0365(2) 1.0106(2) 0.69573(19) 0.0396(9) Uani 1 1 d . . . 
H21 H 1.0862 0.9898 0.7013 0.047 Uiso 1 1 calc R . . 
C22 C 1.0086(2) 1.0558(2) 0.74318(19) 0.0425(10) Uani 1 1 d . . . 
H22 H 1.0398 1.0664 0.7811 0.051 Uiso 1 1 calc R . . 
C23 C 0.9356(3) 1.0860(2) 0.7362(2) 0.0447(10) Uani 1 1 d . . . 
H23 H 0.9173 1.1176 0.7687 0.054 Uiso 1 1 calc R . . 
C24 C 0.8899(2) 1.06953(18) 0.68128(17) 0.0327(8) Uani 1 1 d . . . 
H24 H 0.8393 1.0889 0.6767 0.039 Uiso 1 1 calc R . . 
C25 C 0.92025(18) 0.98875(16) 0.49227(15) 0.0244(6) Uani 1 1 d . . . 
C26 C 0.9800(2) 1.03566(18) 0.48009(18) 0.0315(7) Uani 1 1 d . . . 
H26 H 0.9888 1.0721 0.5106 0.038 Uiso 1 1 calc R . . 
C27 C 1.0267(2) 1.0293(2) 0.42372(19) 0.0389(9) Uani 1 1 d . . . 
H27 H 1.0678 1.0609 0.4157 0.047 Uiso 1 1 calc R . . 
C28 C 1.0126(2) 0.9765(2) 0.37913(19) 0.0460(10) Uani 1 1 d . . . 
H28 H 1.0443 0.9722 0.3403 0.055 Uiso 1 1 calc R . . 
C29 C 0.9541(3) 0.9304(3) 0.3900(2) 0.0514(11) Uani 1 1 d . . . 
H29 H 0.9449 0.8949 0.3586 0.062 Uiso 1 1 calc R . . 
C30 C 0.9079(2) 0.93581(19) 0.44741(18) 0.0355(8) Uani 1 1 d . . . 
H30 H 0.8680 0.9032 0.4557 0.043 Uiso 1 1 calc R . . 
C31 C 0.7879(2) 1.06352(17) 0.54652(17) 0.0294(7) Uani 1 1 d . . . 
C32 C 0.8101(2) 1.13243(18) 0.54634(19) 0.0404(9) Uani 1 1 d . . . 
H32 H 0.8629 1.1447 0.5548 0.048 Uiso 1 1 calc R . . 
C33 C 0.7549(3) 1.1827(2) 0.5338(2) 0.0531(12) Uani 1 1 d . . . 
H33 H 0.7694 1.2295 0.5349 0.064 Uiso 1 1 calc R . . 
C34 C 0.6777(3) 1.1641(2) 0.5197(2) 0.0534(12) Uani 1 1 d . . . 
H34 H 0.6400 1.1985 0.5108 0.064 Uiso 1 1 calc R . . 
C35 C 0.6561(3) 1.0963(2) 0.5185(2) 0.0502(11) Uani 1 1 d . . . 
H35 H 0.6038 1.0839 0.5080 0.060 Uiso 1 1 calc R . . 
C36 C 0.7115(2) 1.0460(2) 0.53274(19) 0.0398(9) Uani 1 1 d . . . 
H36 H 0.6964 0.9993 0.5329 0.048 Uiso 1 1 calc R . . 
C37 C 0.89231(18) 0.47345(16) 0.50300(15) 0.0234(6) Uani 1 1 d . . . 
C38 C 0.8736(2) 0.41480(16) 0.53934(16) 0.0276(7) Uani 1 1 d . . . 
H38 H 0.8329 0.3855 0.5244 0.033 Uiso 1 1 calc R . . 
C39 C 0.9147(2) 0.39946(18) 0.59758(17) 0.0331(8) Uani 1 1 d . . . 
H39 H 0.9018 0.3599 0.6228 0.040 Uiso 1 1 calc R . . 
C40 C 0.9745(2) 0.44206(19) 0.61881(18) 0.0347(8) Uani 1 1 d . . . 
H40 H 1.0025 0.4315 0.6586 0.042 Uiso 1 1 calc R . . 
C41 C 0.9938(2) 0.50007(19) 0.58232(18) 0.0352(8) Uani 1 1 d . . . 
H41 H 1.0352 0.5288 0.5968 0.042 Uiso 1 1 calc R . . 
C42 C 0.9526(2) 0.51602(18) 0.52488(17) 0.0319(7) Uani 1 1 d . . . 
H42 H 0.9653 0.5560 0.5002 0.038 Uiso 1 1 calc R . . 
C43 C 0.9064(2) 0.52176(17) 0.36724(15) 0.0285(7) Uani 1 1 d . . . 
C44 C 0.9797(2) 0.4915(2) 0.36425(19) 0.0380(8) Uani 1 1 d . . . 
H44 H 0.9939 0.4573 0.3957 0.046 Uiso 1 1 calc R . . 
C45 C 1.0325(2) 0.5116(3) 0.3147(2) 0.0519(11) Uani 1 1 d . . . 
H45 H 1.0825 0.4907 0.3121 0.062 Uiso 1 1 calc R . . 
C46 C 1.0122(3) 0.5617(3) 0.2699(2) 0.0524(12) Uani 1 1 d . . . 
H46 H 1.0487 0.5759 0.2369 0.063 Uiso 1 1 calc R . . 
C47 C 0.9398(3) 0.5914(2) 0.2722(2) 0.0472(10) Uani 1 1 d . . . 
H47 H 0.9264 0.6259 0.2408 0.057 Uiso 1 1 calc R . . 
C48 C 0.8865(2) 0.57124(19) 0.31995(17) 0.0364(8) Uani 1 1 d . . . 
H48 H 0.8359 0.5912 0.3207 0.044 Uiso 1 1 calc R . . 
C49 C 0.7715(2) 0.56188(16) 0.44708(14) 0.0253(6) Uani 1 1 d . . . 
C50 C 0.7985(2) 0.62827(17) 0.45484(16) 0.0331(8) Uani 1 1 d . . . 
H50 H 0.8527 0.6379 0.4504 0.040 Uiso 1 1 calc R . . 
C51 C 0.7460(3) 0.68094(18) 0.46924(17) 0.0421(10) Uani 1 1 d . . . 
H51 H 0.7643 0.7266 0.4732 0.051 Uiso 1 1 calc R . . 
C52 C 0.6679(2) 0.6669(2) 0.47770(18) 0.0410(9) Uani 1 1 d . . . 
H52 H 0.6324 0.7028 0.4876 0.049 Uiso 1 1 calc R . . 
C53 C 0.6411(2) 0.6004(2) 0.47172(18) 0.0387(9) Uani 1 1 d . . . 
H53 H 0.5873 0.5906 0.4784 0.046 Uiso 1 1 calc R . . 
C54 C 0.6927(2) 0.54794(18) 0.45597(16) 0.0291(7) Uani 1 1 d . . . 
H54 H 0.6739 0.5025 0.4513 0.035 Uiso 1 1 calc R . . 
C55 C 0.77136(19) 0.41259(16) 0.26931(15) 0.0243(6) Uani 1 1 d . . . 
C56 C 0.7403(2) 0.47810(17) 0.26149(16) 0.0295(7) Uani 1 1 d . . . 
H56 H 0.7208 0.5020 0.2993 0.035 Uiso 1 1 calc R . . 
C57 C 0.7377(2) 0.50829(19) 0.19887(17) 0.0343(8) Uani 1 1 d . . . 
H57 H 0.7162 0.5527 0.1939 0.041 Uiso 1 1 calc R . . 
C58 C 0.7661(2) 0.4745(2) 0.14407(17) 0.0391(9) Uani 1 1 d . . . 
H58 H 0.7637 0.4952 0.1011 0.047 Uiso 1 1 calc R . . 
C59 C 0.7985(3) 0.4094(2) 0.15125(18) 0.0415(9) Uani 1 1 d . . . 
H59 H 0.8195 0.3865 0.1134 0.050 Uiso 1 1 calc R . . 
C60 C 0.8002(2) 0.37825(17) 0.21363(16) 0.0323(8) Uani 1 1 d . . . 
H60 H 0.8211 0.3335 0.2183 0.039 Uiso 1 1 calc R . . 
C61 C 0.67453(18) 0.34039(15) 0.36619(15) 0.0218(6) Uani 1 1 d . . . 
C62 C 0.6317(2) 0.31285(17) 0.31402(17) 0.0292(7) Uani 1 1 d . . . 
H62 H 0.6521 0.3139 0.2698 0.035 Uiso 1 1 calc R . . 
C63 C 0.5589(2) 0.28371(18) 0.3259(2) 0.0345(8) Uani 1 1 d . . . 
H63 H 0.5296 0.2650 0.2899 0.041 Uiso 1 1 calc R . . 
C64 C 0.5296(2) 0.28210(17) 0.3901(2) 0.0346(8) Uani 1 1 d . . . 
H64 H 0.4798 0.2624 0.3982 0.042 Uiso 1 1 calc R . . 
C65 C 0.5723(2) 0.30915(17) 0.44329(18) 0.0329(8) Uani 1 1 d . . . 
H65 H 0.5521 0.3074 0.4875 0.039 Uiso 1 1 calc R . . 
C66 C 0.64449(18) 0.33852(15) 0.43120(17) 0.0246(6) Uani 1 1 d . . . 
H66 H 0.6737 0.3574 0.4672 0.030 Uiso 1 1 calc R . . 
C67 C 0.83776(19) 0.30483(16) 0.35187(16) 0.0253(6) Uani 1 1 d . . . 
C68 C 0.81560(19) 0.23992(17) 0.37043(17) 0.0285(7) Uani 1 1 d . . . 
H68 H 0.7624 0.2302 0.3802 0.034 Uiso 1 1 calc R . . 
C69 C 0.8717(2) 0.18856(19) 0.3747(2) 0.0387(9) Uani 1 1 d . . . 
H69 H 0.8566 0.1437 0.3875 0.046 Uiso 1 1 calc R . . 
C70 C 0.9489(2) 0.2025(2) 0.36057(19) 0.0357(8) Uani 1 1 d . . . 
H70 H 0.9872 0.1676 0.3653 0.043 Uiso 1 1 calc R . . 
C71 C 0.9707(2) 0.2668(2) 0.3396(2) 0.0428(9) Uani 1 1 d . . . 
H71 H 1.0236 0.2758 0.3282 0.051 Uiso 1 1 calc R . . 
C72 C 0.9160(2) 0.31813(19) 0.3350(2) 0.0412(9) Uani 1 1 d . . . 
H72 H 0.9310 0.3624 0.3205 0.049 Uiso 1 1 calc R . . 
N7 N 0.6795(3) 0.2724(4) 0.8128(3) 0.0393(18) Uani 0.685(3) 1 d PD A 1 
O13 O 0.6199(3) 0.2675(3) 0.8419(3) 0.0631(15) Uani 0.685(3) 1 d PD A 1 
N5 N 0.6757(3) 0.1426(3) 0.7091(3) 0.0282(12) Uani 0.685(3) 1 d PD A 1 
O7 O 0.7388(8) 0.1757(6) 0.7137(7) 0.0428(13) Uani 0.685(3) 1 d PD A 1 
O8 O 0.6209(2) 0.1594(2) 0.7457(2) 0.0489(10) Uani 0.685(3) 1 d PD A 1 
O9 O 0.6730(3) 0.0959(2) 0.6706(2) 0.0493(10) Uani 0.685(3) 1 d PD A 1 
N7' N 0.7392(15) 0.1735(18) 0.715(2) 0.0393(18) Uani 0.315(3) 1 d PD A 2 
O13' O 0.6926(9) 0.1306(9) 0.6993(9) 0.0631(15) Uani 0.315(3) 1 d PD A 2 
N5' N 0.6329(6) 0.2352(5) 0.8408(5) 0.0282(12) Uani 0.315(3) 1 d PD A 2 
O7' O 0.6928(9) 0.2716(8) 0.8265(8) 0.0428(13) Uani 0.315(3) 1 d PD A 2 
O8' O 0.6161(5) 0.2324(5) 0.8996(4) 0.0489(10) Uani 0.315(3) 1 d PD A 2 
O9' O 0.5951(6) 0.2081(5) 0.7967(4) 0.0493(10) Uani 0.315(3) 1 d PD A 2 
 
loop_ 
 _atom_site_aniso_label 
 _atom_site_aniso_U_11 
 _atom_site_aniso_U_22 
 _atom_site_aniso_U_33 
 _atom_site_aniso_U_23 
 _atom_site_aniso_U_13 
 _atom_site_aniso_U_12 
Fe1 0.0309(3) 0.0432(3) 0.0481(3) 0.0144(3) -0.0066(2) -0.0001(2) 
P1 0.0197(4) 0.0188(4) 0.0207(4) 0.0021(3) -0.0040(3) -0.0019(3) 
P2 0.0229(4) 0.0188(4) 0.0217(4) 0.0011(3) 0.0006(3) -0.0008(3) 
P3 0.0251(4) 0.0206(4) 0.0185(3) -0.0017(3) 0.0003(3) -0.0015(3) 
P4 0.0230(4) 0.0184(4) 0.0188(3) -0.0026(3) 0.0018(3) -0.0003(3) 
N1 0.0282(14) 0.0233(13) 0.0245(13) 0.0029(10) -0.0082(11) -0.0060(11) 
N2 0.0305(14) 0.0217(13) 0.0216(13) -0.0056(10) 0.0023(11) -0.0056(11) 
N3 0.0403(18) 0.0472(19) 0.0355(17) 0.0185(15) 0.0002(14) -0.0078(15) 
N4 0.0239(14) 0.0277(14) 0.0339(15) 0.0005(12) 0.0005(12) 0.0007(11) 
N6 0.0314(17) 0.0466(19) 0.0425(18) 0.0128(15) -0.0017(14) -0.0075(14) 
O1 0.0378(14) 0.0382(15) 0.0467(15) 0.0094(12) 0.0053(12) -0.0026(12) 
O2 0.0573(18) 0.0397(15) 0.0393(15) 0.0025(12) -0.0045(14) -0.0091(14) 
O3 0.0569(19) 0.067(2) 0.061(2) 0.0273(17) -0.0065(16) -0.0309(17) 
O4 0.0533(19) 0.0506(18) 0.076(2) 0.0191(16) -0.0244(17) -0.0075(15) 
O5 0.078(2) 0.070(2) 0.0380(16) 0.0074(15) -0.0041(15) 0.0098(19) 
O6 0.048(2) 0.136(4) 0.159(5) 0.072(4) -0.011(3) -0.028(3) 
O10 0.0292(13) 0.0462(15) 0.0470(15) 0.0217(12) -0.0057(12) -0.0089(11) 
O11 0.0325(17) 0.128(4) 0.151(4) 0.094(3) -0.003(2) -0.023(2) 
O12 0.0491(16) 0.0393(14) 0.0247(12) 0.0077(10) 0.0006(11) 0.0018(12) 
C1 0.0228(15) 0.0261(15) 0.0165(13) 0.0028(12) -0.0018(12) 0.0024(12) 
C2 0.0234(15) 0.0280(16) 0.0292(16) -0.0012(13) -0.0025(13) 0.0012(13) 
C3 0.0360(19) 0.0277(17) 0.0341(18) -0.0022(14) 0.0012(15) 0.0021(15) 
C4 0.0322(18) 0.0349(18) 0.0177(14) -0.0011(13) 0.0015(13) 0.0122(15) 
C5 0.0232(16) 0.042(2) 0.0402(19) 0.0015(16) -0.0011(15) 0.0026(15) 
C6 0.0275(18) 0.0282(17) 0.051(2) 0.0042(16) -0.0001(16) -0.0020(14) 
C7 0.0220(15) 0.0248(15) 0.0220(14) -0.0020(12) -0.0016(12) -0.0086(12) 
C8 0.0295(17) 0.0366(18) 0.0283(16) 0.0000(15) -0.0042(14) -0.0033(15) 
C9 0.044(2) 0.057(2) 0.0223(16) -0.0037(16) -0.0106(16) -0.0110(19) 
C10 0.044(2) 0.050(2) 0.0266(17) -0.0130(16) 0.0076(16) -0.0156(18) 
C11 0.047(2) 0.035(2) 0.0389(19) -0.0070(16) 0.0114(17) -0.0028(17) 
C12 0.0325(18) 0.0301(17) 0.0299(17) 0.0013(14) 0.0052(14) -0.0006(14) 
C13 0.0186(14) 0.0172(14) 0.0257(15) -0.0031(11) -0.0033(12) 0.0013(11) 
C14 0.0269(16) 0.0190(14) 0.0272(16) -0.0017(12) -0.0054(13) 0.0003(12) 
C15 0.0260(16) 0.0307(17) 0.0337(17) -0.0073(14) -0.0094(14) 0.0027(14) 
C16 0.0147(15) 0.0383(19) 0.052(2) -0.0117(17) -0.0034(15) -0.0019(14) 
C17 0.0237(16) 0.0342(18) 0.0399(19) -0.0013(15) 0.0021(15) -0.0032(14) 
C18 0.0267(17) 0.0245(16) 0.0342(18) 0.0018(13) -0.0010(14) -0.0012(13) 
C19 0.0282(16) 0.0218(15) 0.0227(15) 0.0001(12) 0.0014(12) -0.0059(12) 
C20 0.0304(17) 0.0318(18) 0.0320(17) -0.0037(14) -0.0016(14) -0.0061(15) 
C21 0.035(2) 0.042(2) 0.042(2) 0.0022(17) -0.0121(16) -0.0097(17) 
C22 0.053(2) 0.048(2) 0.0261(18) -0.0008(16) -0.0049(16) -0.027(2) 
C23 0.055(2) 0.045(2) 0.0338(19) -0.0128(17) 0.0132(19) -0.0182(19) 
C24 0.0351(19) 0.0330(18) 0.0300(17) -0.0055(14) 0.0080(15) -0.0088(15) 
C25 0.0244(15) 0.0288(16) 0.0200(14) 0.0019(12) 0.0000(11) 0.0061(13) 
C26 0.0284(17) 0.0309(18) 0.0352(18) 0.0027(14) 0.0043(14) 0.0020(14) 
C27 0.0321(19) 0.046(2) 0.039(2) 0.0188(17) 0.0101(16) 0.0082(16) 
C28 0.042(2) 0.069(3) 0.0271(18) 0.0099(19) 0.0120(16) 0.016(2) 
C29 0.055(3) 0.067(3) 0.032(2) -0.018(2) 0.0024(19) 0.011(2) 
C30 0.0361(19) 0.0369(19) 0.0334(18) -0.0069(15) -0.0022(15) -0.0036(16) 
C31 0.0334(18) 0.0282(17) 0.0265(16) 0.0036(13) 0.0054(14) 0.0089(14) 
C32 0.047(2) 0.0297(18) 0.045(2) 0.0095(16) 0.0160(17) 0.0052(17) 
C33 0.079(3) 0.030(2) 0.050(2) 0.0159(17) 0.021(2) 0.022(2) 
C34 0.060(3) 0.053(3) 0.048(2) 0.016(2) 0.016(2) 0.029(2) 
C35 0.041(2) 0.063(3) 0.047(2) 0.003(2) -0.0030(19) 0.022(2) 
C36 0.039(2) 0.041(2) 0.039(2) 0.0043(16) -0.0043(17) 0.0123(17) 
C37 0.0241(15) 0.0253(15) 0.0207(14) -0.0035(12) -0.0019(12) 0.0031(12) 
C38 0.0309(17) 0.0242(16) 0.0278(16) -0.0023(13) 0.0017(14) 0.0017(13) 
C39 0.039(2) 0.0323(18) 0.0275(16) 0.0067(14) -0.0019(15) 0.0058(15) 
C40 0.0365(19) 0.038(2) 0.0299(17) -0.0004(15) -0.0058(15) 0.0119(16) 
C41 0.0327(18) 0.038(2) 0.0346(18) -0.0098(16) -0.0054(14) 0.0010(16) 
C42 0.0370(18) 0.0259(17) 0.0329(17) -0.0003(14) -0.0018(14) -0.0008(14) 
C43 0.0303(17) 0.0328(17) 0.0223(15) -0.0045(13) 0.0050(13) -0.0097(14) 
C44 0.0316(18) 0.046(2) 0.0365(19) -0.0077(17) 0.0062(15) -0.0051(16) 
C45 0.033(2) 0.068(3) 0.055(3) -0.022(2) 0.0127(18) -0.011(2) 
C46 0.056(3) 0.069(3) 0.032(2) -0.003(2) 0.0107(19) -0.030(2) 
C47 0.050(2) 0.061(3) 0.0306(19) 0.0039(18) -0.0002(18) -0.024(2) 
C48 0.042(2) 0.042(2) 0.0257(17) 0.0041(15) -0.0035(15) -0.0140(16) 
C49 0.0365(17) 0.0233(15) 0.0162(14) -0.0004(11) -0.0037(13) 0.0032(14) 
C50 0.046(2) 0.0256(17) 0.0277(16) -0.0010(14) -0.0002(15) -0.0011(16) 
C51 0.080(3) 0.0199(17) 0.0261(17) -0.0046(13) -0.0061(18) 0.0093(18) 
C52 0.053(2) 0.041(2) 0.0292(18) -0.0101(15) -0.0097(17) 0.0245(19) 
C53 0.037(2) 0.049(2) 0.0303(18) -0.0133(16) -0.0064(16) 0.0146(17) 
C54 0.0329(18) 0.0321(17) 0.0224(15) -0.0065(13) -0.0015(13) 0.0044(14) 
C55 0.0275(15) 0.0236(15) 0.0217(14) -0.0010(12) 0.0014(13) -0.0065(13) 
C56 0.0310(17) 0.0311(17) 0.0265(15) -0.0023(13) -0.0010(14) 0.0004(14) 
C57 0.0341(18) 0.0334(18) 0.0355(17) 0.0078(15) -0.0121(15) -0.0046(16) 
C58 0.042(2) 0.046(2) 0.0287(17) 0.0097(15) -0.0025(16) -0.0186(18) 
C59 0.058(2) 0.041(2) 0.0253(17) -0.0066(15) 0.0137(17) -0.0163(19) 
C60 0.049(2) 0.0233(16) 0.0252(16) -0.0056(13) 0.0075(15) -0.0091(15) 
C61 0.0220(14) 0.0167(14) 0.0266(15) 0.0011(12) 0.0000(12) 0.0036(12) 
C62 0.0264(16) 0.0310(17) 0.0301(17) -0.0014(14) -0.0023(14) 0.0036(14) 
C63 0.0264(17) 0.0283(17) 0.049(2) -0.0043(15) -0.0106(16) -0.0002(14) 
C64 0.0230(17) 0.0206(16) 0.060(2) 0.0017(16) 0.0041(16) 0.0006(13) 
C65 0.0368(19) 0.0231(16) 0.0387(19) 0.0038(14) 0.0117(16) 0.0055(14) 
C66 0.0257(15) 0.0187(14) 0.0294(16) -0.0005(12) 0.0034(13) 0.0013(12) 
C67 0.0260(16) 0.0254(16) 0.0244(15) -0.0035(12) 0.0021(13) 0.0022(13) 
C68 0.0245(15) 0.0291(17) 0.0320(16) 0.0046(14) 0.0054(13) 0.0031(13) 
C69 0.040(2) 0.0310(18) 0.045(2) 0.0130(16) 0.0096(17) 0.0095(16) 
C70 0.0293(18) 0.039(2) 0.039(2) -0.0020(16) 0.0027(15) 0.0114(15) 
C71 0.0257(18) 0.039(2) 0.064(3) -0.0072(19) 0.0088(18) 0.0014(16) 
C72 0.0296(19) 0.0291(19) 0.065(3) -0.0011(18) 0.0134(18) -0.0015(15) 
N7 0.025(3) 0.046(3) 0.047(4) -0.019(3) 0.002(2) 0.011(2) 
O13 0.036(2) 0.064(3) 0.089(4) -0.032(3) 0.015(2) 0.000(2) 
N5 0.031(3) 0.020(2) 0.033(2) 0.0078(18) -0.003(2) 0.0078(18) 
O7 0.063(3) 0.027(2) 0.038(2) -0.0115(19) 0.004(2) -0.002(2) 
O8 0.046(2) 0.044(2) 0.057(2) -0.0088(18) 0.0112(19) -0.0031(17) 
O9 0.059(2) 0.041(2) 0.049(2) -0.0151(18) 0.0072(19) -0.0046(19) 
N7' 0.025(3) 0.046(3) 0.047(4) -0.019(3) 0.002(2) 0.011(2) 
O13' 0.036(2) 0.064(3) 0.089(4) -0.032(3) 0.015(2) 0.000(2) 
N5' 0.031(3) 0.020(2) 0.033(2) 0.0078(18) -0.003(2) 0.0078(18) 
O7' 0.063(3) 0.027(2) 0.038(2) -0.0115(19) 0.004(2) -0.002(2) 
O8' 0.046(2) 0.044(2) 0.057(2) -0.0088(18) 0.0112(19) -0.0031(17) 
O9' 0.059(2) 0.041(2) 0.049(2) -0.0151(18) 0.0072(19) -0.0046(19) 
 
_geom_special_details 
; 
 All esds (except the esd in the dihedral angle between two l.s. planes) 
 are estimated using the full covariance matrix.  The cell esds are taken 
 into account individually in the estimation of esds in distances, angles 
 and torsion angles; correlations between esds in cell parameters are only 
 used when they are defined by crystal symmetry.  An approximate (isotropic) 
 treatment of cell esds is used for estimating esds involving l.s. planes. 
; 
 
loop_ 
 _geom_bond_atom_site_label_1 
 _geom_bond_atom_site_label_2 
 _geom_bond_distance 
 _geom_bond_site_symmetry_2 
 _geom_bond_publ_flag 
Fe1 O7' 1.778(15) . ? 
Fe1 N7 1.779(7) . ? 
Fe1 O7 1.903(9) . ? 
Fe1 N7' 1.92(2) . ? 
Fe1 O10 2.094(3) . ? 
Fe1 O4 2.096(3) . ? 
Fe1 O2 2.155(3) . ? 
Fe1 O1 2.222(3) . ? 
P1 N1 1.570(3) . ? 
P1 C1 1.798(3) . ? 
P1 C7 1.804(3) . ? 
P1 C13 1.805(3) . ? 
P2 N1 1.576(3) . ? 
P2 C19 1.791(3) . ? 
P2 C31 1.800(3) . ? 
P2 C25 1.801(3) . ? 
P3 N2 1.580(3) . ? 
P3 C37 1.796(3) . ? 
P3 C43 1.797(3) . ? 
P3 C49 1.801(3) . ? 
P4 N2 1.567(3) . ? 
P4 C61 1.796(3) . ? 
P4 C67 1.800(3) . ? 
P4 C55 1.802(3) . ? 
N3 O3 1.225(4) . ? 
N3 O1 1.270(4) . ? 
N3 O2 1.276(4) . ? 
N4 O5 1.197(4) . ? 
N4 O6 1.223(5) . ? 
N4 O4 1.269(4) . ? 
N6 O11 1.205(4) . ? 
N6 O12 1.229(4) . ? 
N6 O10 1.302(4) . ? 
C1 C2 1.384(4) . ? 
C1 C6 1.400(5) . ? 
C2 C3 1.397(5) . ? 
C2 H2 0.9500 . ? 
C3 C4 1.380(5) . ? 
C3 H3 0.9500 . ? 
C4 C5 1.366(5) . ? 
C4 H4 0.9500 . ? 
C5 C6 1.387(5) . ? 
C5 H5 0.9500 . ? 
C6 H6 0.9500 . ? 
C7 C8 1.377(5) . ? 
C7 C12 1.389(5) . ? 
C8 C9 1.400(5) . ? 
C8 H8 0.9500 . ? 
C9 C10 1.382(6) . ? 
C9 H9 0.9500 . ? 
C10 C11 1.391(6) . ? 
C10 H10 0.9500 . ? 
C11 C12 1.380(5) . ? 
C11 H11 0.9500 . ? 
C12 H12A 0.9500 . ? 
C13 C18 1.390(5) . ? 
C13 C14 1.393(4) . ? 
C14 C15 1.391(5) . ? 
C14 H14 0.9500 . ? 
C15 C16 1.368(5) . ? 
C15 H15 0.9500 . ? 
C16 C17 1.383(5) . ? 
C16 H16 0.9500 . ? 
C17 C18 1.399(5) . ? 
C17 H17 0.9500 . ? 
C18 H18 0.9500 . ? 
C19 C20 1.389(5) . ? 
C19 C24 1.396(5) . ? 
C20 C21 1.380(5) . ? 
C20 H20 0.9500 . ? 
C21 C22 1.381(6) . ? 
C21 H21 0.9500 . ? 
C22 C23 1.389(6) . ? 
C22 H22 0.9500 . ? 
C23 C24 1.386(5) . ? 
C23 H23 0.9500 . ? 
C24 H24 0.9500 . ? 
C25 C30 1.386(5) . ? 
C25 C26 1.396(5) . ? 
C26 C27 1.385(5) . ? 
C26 H26 0.9500 . ? 
C27 C28 1.386(6) . ? 
C27 H27 0.9500 . ? 
C28 C29 1.364(7) . ? 
C28 H28 0.9500 . ? 
C29 C30 1.397(5) . ? 
C29 H29 0.9500 . ? 
C30 H30 0.9500 . ? 
C31 C36 1.379(5) . ? 
C31 C32 1.402(5) . ? 
C32 C33 1.386(6) . ? 
C32 H32 0.9500 . ? 
C33 C34 1.398(7) . ? 
C33 H33 0.9500 . ? 
C34 C35 1.378(7) . ? 
C34 H34 0.9500 . ? 
C35 C36 1.396(5) . ? 
C35 H35 0.9500 . ? 
C36 H36 0.9500 . ? 
C37 C38 1.396(5) . ? 
C37 C42 1.397(5) . ? 
C38 C39 1.392(5) . ? 
C38 H38 0.9500 . ? 
C39 C40 1.387(5) . ? 
C39 H39 0.9500 . ? 
C40 C41 1.389(5) . ? 
C40 H40 0.9500 . ? 
C41 C42 1.382(5) . ? 
C41 H41 0.9500 . ? 
C42 H42 0.9500 . ? 
C43 C44 1.389(5) . ? 
C43 C48 1.395(5) . ? 
C44 C45 1.396(6) . ? 
C44 H44 0.9500 . ? 
C45 C46 1.372(7) . ? 
C45 H45 0.9500 . ? 
C46 C47 1.368(7) . ? 
C46 H46 0.9500 . ? 
C47 C48 1.378(5) . ? 
C47 H47 0.9500 . ? 
C48 H48 0.9500 . ? 
C49 C54 1.388(5) . ? 
C49 C50 1.388(5) . ? 
C50 C51 1.398(5) . ? 
C50 H50 0.9500 . ? 
C51 C52 1.374(6) . ? 
C51 H51 0.9500 . ? 
C52 C53 1.387(6) . ? 
C52 H52 0.9500 . ? 
C53 C54 1.390(5) . ? 
C53 H53 0.9500 . ? 
C54 H54 0.9500 . ? 
C55 C60 1.390(4) . ? 
C55 C56 1.397(5) . ? 
C56 C57 1.384(5) . ? 
C56 H56 0.9500 . ? 
C57 C58 1.368(5) . ? 
C57 H57 0.9500 . ? 
C58 C59 1.397(6) . ? 
C58 H58 0.9500 . ? 
C59 C60 1.387(5) . ? 
C59 H59 0.9500 . ? 
C60 H60 0.9500 . ? 
C61 C62 1.384(5) . ? 
C61 C66 1.397(4) . ? 
C62 C63 1.390(5) . ? 
C62 H62 0.9500 . ? 
C63 C64 1.377(6) . ? 
C63 H63 0.9500 . ? 
C64 C65 1.395(5) . ? 
C64 H64 0.9500 . ? 
C65 C66 1.383(5) . ? 
C65 H65 0.9500 . ? 
C66 H66 0.9500 . ? 
C67 C68 1.377(5) . ? 
C67 C72 1.404(5) . ? 
C68 C69 1.393(5) . ? 
C68 H68 0.9500 . ? 
C69 C70 1.379(5) . ? 
C69 H69 0.9500 . ? 
C70 C71 1.379(6) . ? 
C70 H70 0.9500 . ? 
C71 C72 1.377(5) . ? 
C71 H71 0.9500 . ? 
C72 H72 0.9500 . ? 
N7 O13 1.177(8) . ? 
N5 O9 1.195(7) . ? 
N5 O8 1.234(6) . ? 
N5 O7 1.263(10) . ? 
N7' O13' 1.20(2) . ? 
N5' O8' 1.211(12) . ? 
N5' O9' 1.214(11) . ? 
N5' O7' 1.280(16) . ? 
 
loop_ 
 _geom_angle_atom_site_label_1 
 _geom_angle_atom_site_label_2 
 _geom_angle_atom_site_label_3 
 _geom_angle 
 _geom_angle_site_symmetry_1 
 _geom_angle_site_symmetry_3 
 _geom_angle_publ_flag 
O7' Fe1 N7 11.5(5) . . ? 
O7' Fe1 O7 111.1(7) . . ? 
N7 Fe1 O7 104.9(4) . . ? 
O7' Fe1 N7' 110.6(9) . . ? 
N7 Fe1 N7' 104.7(9) . . ? 
O7 Fe1 N7' 1(2) . . ? 
O7' Fe1 O10 91.1(5) . . ? 
N7 Fe1 O10 101.2(2) . . ? 
O7 Fe1 O10 91.5(5) . . ? 
N7' Fe1 O10 90.1(14) . . ? 
O7' Fe1 O4 111.3(5) . . ? 
N7 Fe1 O4 102.9(3) . . ? 
O7 Fe1 O4 94.3(5) . . ? 
N7' Fe1 O4 95.8(15) . . ? 
O10 Fe1 O4 152.81(12) . . ? 
O7' Fe1 O2 94.1(5) . . ? 
N7 Fe1 O2 100.6(2) . . ? 
O7 Fe1 O2 154.4(4) . . ? 
N7' Fe1 O2 154.6(8) . . ? 
O10 Fe1 O2 83.62(11) . . ? 
O4 Fe1 O2 79.75(11) . . ? 
O7' Fe1 O1 151.4(4) . . ? 
N7 Fe1 O1 159.5(2) . . ? 
O7 Fe1 O1 95.6(4) . . ? 
N7' Fe1 O1 95.7(8) . . ? 
O10 Fe1 O1 77.50(10) . . ? 
O4 Fe1 O1 75.51(12) . . ? 
O2 Fe1 O1 58.90(11) . . ? 
N1 P1 C1 111.86(15) . . ? 
N1 P1 C7 114.60(14) . . ? 
C1 P1 C7 108.00(14) . . ? 
N1 P1 C13 108.24(14) . . ? 
C1 P1 C13 107.85(14) . . ? 
C7 P1 C13 105.95(14) . . ? 
N1 P2 C19 115.04(14) . . ? 
N1 P2 C31 109.53(16) . . ? 
C19 P2 C31 108.54(16) . . ? 
N1 P2 C25 108.63(15) . . ? 
C19 P2 C25 107.17(15) . . ? 
C31 P2 C25 107.66(15) . . ? 
N2 P3 C37 109.09(15) . . ? 
N2 P3 C43 116.23(14) . . ? 
C37 P3 C43 106.60(15) . . ? 
N2 P3 C49 108.10(15) . . ? 
C37 P3 C49 108.46(14) . . ? 
C43 P3 C49 108.14(16) . . ? 
N2 P4 C61 107.52(14) . . ? 
N2 P4 C67 112.83(15) . . ? 
C61 P4 C67 107.16(14) . . ? 
N2 P4 C55 113.22(14) . . ? 
C61 P4 C55 108.15(14) . . ? 
C67 P4 C55 107.70(15) . . ? 
P1 N1 P2 143.47(18) . . ? 
P4 N2 P3 144.16(18) . . ? 
O3 N3 O1 122.0(4) . . ? 
O3 N3 O2 122.5(4) . . ? 
O1 N3 O2 115.5(3) . . ? 
O5 N4 O6 122.0(4) . . ? 
O5 N4 O4 122.1(3) . . ? 
O6 N4 O4 115.9(3) . . ? 
O11 N6 O12 123.1(3) . . ? 
O11 N6 O10 119.4(3) . . ? 
O12 N6 O10 117.5(3) . . ? 
N3 O1 Fe1 91.3(2) . . ? 
N3 O2 Fe1 94.3(2) . . ? 
N4 O4 Fe1 127.8(2) . . ? 
N6 O10 Fe1 123.8(2) . . ? 
C2 C1 C6 119.0(3) . . ? 
C2 C1 P1 122.2(2) . . ? 
C6 C1 P1 118.9(3) . . ? 
C1 C2 C3 120.0(3) . . ? 
C1 C2 H2 120.0 . . ? 
C3 C2 H2 120.0 . . ? 
C4 C3 C2 119.9(3) . . ? 
C4 C3 H3 120.0 . . ? 
C2 C3 H3 120.0 . . ? 
C5 C4 C3 120.7(3) . . ? 
C5 C4 H4 119.7 . . ? 
C3 C4 H4 119.7 . . ? 
C4 C5 C6 119.9(3) . . ? 
C4 C5 H5 120.1 . . ? 
C6 C5 H5 120.1 . . ? 
C5 C6 C1 120.5(3) . . ? 
C5 C6 H6 119.8 . . ? 
C1 C6 H6 119.8 . . ? 
C8 C7 C12 120.0(3) . . ? 
C8 C7 P1 123.1(3) . . ? 
C12 C7 P1 116.9(2) . . ? 
C7 C8 C9 119.4(3) . . ? 
C7 C8 H8 120.3 . . ? 
C9 C8 H8 120.3 . . ? 
C10 C9 C8 120.1(4) . . ? 
C10 C9 H9 119.9 . . ? 
C8 C9 H9 119.9 . . ? 
C9 C10 C11 120.5(3) . . ? 
C9 C10 H10 119.7 . . ? 
C11 C10 H10 119.7 . . ? 
C12 C11 C10 118.8(4) . . ? 
C12 C11 H11 120.6 . . ? 
C10 C11 H11 120.6 . . ? 
C11 C12 C7 121.2(3) . . ? 
C11 C12 H12A 119.4 . . ? 
C7 C12 H12A 119.4 . . ? 
C18 C13 C14 121.2(3) . . ? 
C18 C13 P1 120.6(2) . . ? 
C14 C13 P1 118.3(2) . . ? 
C15 C14 C13 118.7(3) . . ? 
C15 C14 H14 120.6 . . ? 
C13 C14 H14 120.6 . . ? 
C16 C15 C14 120.6(3) . . ? 
C16 C15 H15 119.7 . . ? 
C14 C15 H15 119.7 . . ? 
C15 C16 C17 120.9(3) . . ? 
C15 C16 H16 119.6 . . ? 
C17 C16 H16 119.6 . . ? 
C16 C17 C18 119.8(3) . . ? 
C16 C17 H17 120.1 . . ? 
C18 C17 H17 120.1 . . ? 
C13 C18 C17 118.8(3) . . ? 
C13 C18 H18 120.6 . . ? 
C17 C18 H18 120.6 . . ? 
C20 C19 C24 119.5(3) . . ? 
C20 C19 P2 118.9(2) . . ? 
C24 C19 P2 121.3(3) . . ? 
C21 C20 C19 120.5(3) . . ? 
C21 C20 H20 119.8 . . ? 
C19 C20 H20 119.8 . . ? 
C20 C21 C22 119.6(4) . . ? 
C20 C21 H21 120.2 . . ? 
C22 C21 H21 120.2 . . ? 
C21 C22 C23 120.9(4) . . ? 
C21 C22 H22 119.5 . . ? 
C23 C22 H22 119.5 . . ? 
C24 C23 C22 119.3(4) . . ? 
C24 C23 H23 120.4 . . ? 
C22 C23 H23 120.4 . . ? 
C23 C24 C19 120.2(4) . . ? 
C23 C24 H24 119.9 . . ? 
C19 C24 H24 119.9 . . ? 
C30 C25 C26 119.4(3) . . ? 
C30 C25 P2 119.7(3) . . ? 
C26 C25 P2 120.9(3) . . ? 
C27 C26 C25 120.3(3) . . ? 
C27 C26 H26 119.8 . . ? 
C25 C26 H26 119.8 . . ? 
C26 C27 C28 119.3(4) . . ? 
C26 C27 H27 120.4 . . ? 
C28 C27 H27 120.4 . . ? 
C29 C28 C27 121.2(3) . . ? 
C29 C28 H28 119.4 . . ? 
C27 C28 H28 119.4 . . ? 
C28 C29 C30 119.7(4) . . ? 
C28 C29 H29 120.1 . . ? 
C30 C29 H29 120.1 . . ? 
C25 C30 C29 120.1(4) . . ? 
C25 C30 H30 120.0 . . ? 
C29 C30 H30 120.0 . . ? 
C36 C31 C32 119.7(3) . . ? 
C36 C31 P2 119.3(3) . . ? 
C32 C31 P2 120.9(3) . . ? 
C33 C32 C31 119.9(4) . . ? 
C33 C32 H32 120.0 . . ? 
C31 C32 H32 120.0 . . ? 
C32 C33 C34 119.7(4) . . ? 
C32 C33 H33 120.1 . . ? 
C34 C33 H33 120.1 . . ? 
C35 C34 C33 120.5(4) . . ? 
C35 C34 H34 119.7 . . ? 
C33 C34 H34 119.7 . . ? 
C34 C35 C36 119.5(4) . . ? 
C34 C35 H35 120.2 . . ? 
C36 C35 H35 120.2 . . ? 
C31 C36 C35 120.6(4) . . ? 
C31 C36 H36 119.7 . . ? 
C35 C36 H36 119.7 . . ? 
C38 C37 C42 119.9(3) . . ? 
C38 C37 P3 118.7(2) . . ? 
C42 C37 P3 121.4(3) . . ? 
C39 C38 C37 119.7(3) . . ? 
C39 C38 H38 120.1 . . ? 
C37 C38 H38 120.1 . . ? 
C40 C39 C38 119.9(3) . . ? 
C40 C39 H39 120.0 . . ? 
C38 C39 H39 120.0 . . ? 
C39 C40 C41 120.4(3) . . ? 
C39 C40 H40 119.8 . . ? 
C41 C40 H40 119.8 . . ? 
C42 C41 C40 120.0(3) . . ? 
C42 C41 H41 120.0 . . ? 
C40 C41 H41 120.0 . . ? 
C41 C42 C37 120.1(3) . . ? 
C41 C42 H42 119.9 . . ? 
C37 C42 H42 119.9 . . ? 
C44 C43 C48 119.2(3) . . ? 
C44 C43 P3 119.2(3) . . ? 
C48 C43 P3 121.5(3) . . ? 
C43 C44 C45 119.6(4) . . ? 
C43 C44 H44 120.2 . . ? 
C45 C44 H44 120.2 . . ? 
C46 C45 C44 120.0(4) . . ? 
C46 C45 H45 120.0 . . ? 
C44 C45 H45 120.0 . . ? 
C47 C46 C45 120.8(4) . . ? 
C47 C46 H46 119.6 . . ? 
C45 C46 H46 119.6 . . ? 
C46 C47 C48 120.0(4) . . ? 
C46 C47 H47 120.0 . . ? 
C48 C47 H47 120.0 . . ? 
C47 C48 C43 120.4(4) . . ? 
C47 C48 H48 119.8 . . ? 
C43 C48 H48 119.8 . . ? 
C54 C49 C50 119.6(3) . . ? 
C54 C49 P3 119.1(3) . . ? 
C50 C49 P3 121.3(3) . . ? 
C49 C50 C51 120.0(4) . . ? 
C49 C50 H50 120.0 . . ? 
C51 C50 H50 120.0 . . ? 
C52 C51 C50 120.2(4) . . ? 
C52 C51 H51 119.9 . . ? 
C50 C51 H51 119.9 . . ? 
C51 C52 C53 119.9(3) . . ? 
C51 C52 H52 120.0 . . ? 
C53 C52 H52 120.0 . . ? 
C52 C53 C54 120.2(4) . . ? 
C52 C53 H53 119.9 . . ? 
C54 C53 H53 119.9 . . ? 
C49 C54 C53 120.1(3) . . ? 
C49 C54 H54 120.0 . . ? 
C53 C54 H54 120.0 . . ? 
C60 C55 C56 119.3(3) . . ? 
C60 C55 P4 122.6(3) . . ? 
C56 C55 P4 118.1(2) . . ? 
C57 C56 C55 120.3(3) . . ? 
C57 C56 H56 119.8 . . ? 
C55 C56 H56 119.8 . . ? 
C58 C57 C56 120.3(3) . . ? 
C58 C57 H57 119.8 . . ? 
C56 C57 H57 119.8 . . ? 
C57 C58 C59 120.0(3) . . ? 
C57 C58 H58 120.0 . . ? 
C59 C58 H58 120.0 . . ? 
C60 C59 C58 120.1(3) . . ? 
C60 C59 H59 120.0 . . ? 
C58 C59 H59 120.0 . . ? 
C59 C60 C55 119.9(3) . . ? 
C59 C60 H60 120.1 . . ? 
C55 C60 H60 120.1 . . ? 
C62 C61 C66 119.6(3) . . ? 
C62 C61 P4 120.7(2) . . ? 
C66 C61 P4 119.6(2) . . ? 
C61 C62 C63 120.5(3) . . ? 
C61 C62 H62 119.8 . . ? 
C63 C62 H62 119.8 . . ? 
C64 C63 C62 119.6(3) . . ? 
C64 C63 H63 120.2 . . ? 
C62 C63 H63 120.2 . . ? 
C63 C64 C65 120.6(3) . . ? 
C63 C64 H64 119.7 . . ? 
C65 C64 H64 119.7 . . ? 
C66 C65 C64 119.5(3) . . ? 
C66 C65 H65 120.2 . . ? 
C64 C65 H65 120.2 . . ? 
C65 C66 C61 120.1(3) . . ? 
C65 C66 H66 119.9 . . ? 
C61 C66 H66 119.9 . . ? 
C68 C67 C72 119.9(3) . . ? 
C68 C67 P4 122.0(2) . . ? 
C72 C67 P4 118.1(3) . . ? 
C67 C68 C69 119.5(3) . . ? 
C67 C68 H68 120.2 . . ? 
C69 C68 H68 120.2 . . ? 
C70 C69 C68 120.4(3) . . ? 
C70 C69 H69 119.8 . . ? 
C68 C69 H69 119.8 . . ? 
C69 C70 C71 120.1(3) . . ? 
C69 C70 H70 119.9 . . ? 
C71 C70 H70 119.9 . . ? 
C72 C71 C70 120.2(3) . . ? 
C72 C71 H71 119.9 . . ? 
C70 C71 H71 119.9 . . ? 
C71 C72 C67 119.8(3) . . ? 
C71 C72 H72 120.1 . . ? 
C67 C72 H72 120.1 . . ? 
O13 N7 Fe1 164.1(7) . . ? 
O9 N5 O8 123.9(6) . . ? 
O9 N5 O7 118.1(6) . . ? 
O8 N5 O7 118.0(7) . . ? 
N5 O7 Fe1 130.8(8) . . ? 
O13' N7' Fe1 150(2) . . ? 
O8' N5' O9' 123.8(10) . . ? 
O8' N5' O7' 115.6(11) . . ? 
O9' N5' O7' 120.6(11) . . ? 
N5' O7' Fe1 127.4(11) . . ? 
 
_diffrn_measured_fraction_theta_max    0.998 
_diffrn_reflns_theta_full              26.41 
_diffrn_measured_fraction_theta_full   0.998 
_refine_diff_density_max    0.972 
_refine_diff_density_min   -1.374 
_refine_diff_density_rms    0.185 

complex 2  ===END

complex 3
 
data_111221ltb_0m 
 
_audit_creation_method            SHELXL-97 
_chemical_name_systematic 
; 
 ? 
; 
_chemical_name_common             ? 
_chemical_melting_point           ? 
_chemical_formula_moiety          ? 
_chemical_formula_sum 
 'C36 H30 Fe N5 O8 P2' 
_chemical_formula_weight          778.44 
 
loop_ 
 _atom_type_symbol 
 _atom_type_description 
 _atom_type_scat_dispersion_real 
 _atom_type_scat_dispersion_imag 
 _atom_type_scat_source 
 'C'  'C'   0.0033   0.0016 
 'International Tables Vol C Tables 4.2.6.8 and 6.1.1.4' 
 'H'  'H'   0.0000   0.0000 
 'International Tables Vol C Tables 4.2.6.8 and 6.1.1.4' 
 'N'  'N'   0.0061   0.0033 
 'International Tables Vol C Tables 4.2.6.8 and 6.1.1.4' 
 'O'  'O'   0.0106   0.0060 
 'International Tables Vol C Tables 4.2.6.8 and 6.1.1.4' 
 'P'  'P'   0.1023   0.0942 
 'International Tables Vol C Tables 4.2.6.8 and 6.1.1.4' 
 'Fe'  'Fe'   0.3463   0.8444 
 'International Tables Vol C Tables 4.2.6.8 and 6.1.1.4' 
 
_symmetry_cell_setting            triclinic
_symmetry_space_group_name_H-M   'P -1'
_symmetry_space_group_name_hall  '-P 1'
 
loop_ 
 _symmetry_equiv_pos_as_xyz 
 'x, y, z' 
 '-x, -y, -z' 
 
_cell_length_a                    9.8407(7) 
_cell_length_b                    11.8917(8) 
_cell_length_c                    16.5043(12) 
_cell_angle_alpha                 70.701(3) 
_cell_angle_beta                  79.615(3) 
_cell_angle_gamma                 83.697(3) 
_cell_volume                      1790.4(2) 
_cell_formula_units_Z             2 
_cell_measurement_temperature     100(2) 
_cell_measurement_reflns_used     6098
_cell_measurement_theta_min       2.6465
_cell_measurement_theta_max       26.0612 
 
_exptl_crystal_description        Lump
_exptl_crystal_colour             Black
_exptl_crystal_size_max           0.15
_exptl_crystal_size_mid           0.15
_exptl_crystal_size_min           0.12
_exptl_crystal_density_meas       'not measured' 
_exptl_crystal_density_diffrn     1.444 
_exptl_crystal_density_method     'not measured' 
_exptl_crystal_F_000              802 
_exptl_absorpt_coefficient_mu     0.570 
_exptl_absorpt_correction_type    multi-scan
_exptl_absorpt_correction_T_min   0.7774  
_exptl_absorpt_correction_T_max   0.9486
_exptl_absorpt_process_details    'SADABS V2008/1 (Bruker AXS)' 
 
_exptl_special_details 
; 
 ? 
; 
 
_diffrn_ambient_temperature       100(2) 
_diffrn_radiation_wavelength      0.71073 
_diffrn_radiation_type            MoK\a 
_diffrn_radiation_source          'fine-focus sealed tube' 
_diffrn_radiation_monochromator   graphite 
_diffrn_measurement_device_type   'Bruker APEX-II CCD'
_diffrn_measurement_method        '\f and \w scans'
_diffrn_detector_area_resol_mean  8.3333  
_diffrn_reflns_number             22487 
_diffrn_reflns_av_R_equivalents   0.0489 
_diffrn_reflns_av_sigmaI/netI     0.0526 
_diffrn_reflns_limit_h_min        -11 
_diffrn_reflns_limit_h_max        11 
_diffrn_reflns_limit_k_min        -9 
_diffrn_reflns_limit_k_max        14 
_diffrn_reflns_limit_l_min        -19 
_diffrn_reflns_limit_l_max        19 
_diffrn_reflns_theta_min          2.11 
_diffrn_reflns_theta_max          25.09 
_reflns_number_total              6166 
_reflns_number_gt                 4685 
_reflns_threshold_expression      >2sigma(I) 
 
_computing_data_collection        'APEX2 (Bruker AXS, 2010)'
_computing_cell_refinement        'SAINT V7.68A (Bruker AXS, 2009)'
_computing_data_reduction         'SAINT V7.68A (Bruker AXS, 2009)'
_computing_structure_solution     'SHELXS-97 (Sheldrick, 2008)'
_computing_structure_refinement   'SHELXL-97 (Sheldrick, 2008)'
_computing_molecular_graphics     'SHELXTL (Sheldrick, 2008)'
_computing_publication_material   'SHELXTL'
 
_refine_special_details 
; 
 Refinement of F^2^ against ALL reflections.  The weighted R-factor wR and 
 goodness of fit S are based on F^2^, conventional R-factors R are based 
 on F, with F set to zero for negative F^2^. The threshold expression of 
 F^2^ > 2sigma(F^2^) is used only for calculating R-factors(gt) etc. and is 
 not relevant to the choice of reflections for refinement.  R-factors based 
 on F^2^ are statistically about twice as large as those based on F, and R- 
 factors based on ALL data will be even larger. 
; 
 
_refine_ls_structure_factor_coef  Fsqd  
_refine_ls_matrix_type            full 
_refine_ls_weighting_scheme       calc  
_refine_ls_weighting_details 
 'calc w=1/[\s^2^(Fo^2^)+(0.1103P)^2^+0.0000P] where P=(Fo^2^+2Fc^2^)/3' 
_atom_sites_solution_primary      direct 
_atom_sites_solution_secondary    difmap 
_atom_sites_solution_hydrogens    geom 
_refine_ls_hydrogen_treatment     constr
_refine_ls_extinction_method      SHELXL 
_refine_ls_extinction_coef        0.036(3) 
_refine_ls_extinction_expression 
 'Fc^*^=kFc[1+0.001xFc^2^\l^3^/sin(2\q)]^-1/4^' 
_refine_ls_number_reflns          6166 
_refine_ls_number_parameters      470 
_refine_ls_number_restraints      0 
_refine_ls_R_factor_all           0.0718 
_refine_ls_R_factor_gt            0.0506 
_refine_ls_wR_factor_ref          0.1654 
_refine_ls_wR_factor_gt           0.1350 
_refine_ls_goodness_of_fit_ref    1.042 
_refine_ls_restrained_S_all       1.042 
_refine_ls_shift/su_max           0.001 
_refine_ls_shift/su_mean          0.000 
 
loop_ 
 _atom_site_label 
 _atom_site_type_symbol 
 _atom_site_fract_x 
 _atom_site_fract_y 
 _atom_site_fract_z 
 _atom_site_U_iso_or_equiv 
 _atom_site_adp_type 
 _atom_site_occupancy 
 _atom_site_symmetry_multiplicity 
 _atom_site_calc_flag 
 _atom_site_refinement_flags 
 _atom_site_disorder_assembly 
 _atom_site_disorder_group 
Fe1 Fe 0.19432(5) 0.14185(4) 0.21000(3) 0.0289(2) Uani 1 1 d . . . 
N1 N 0.3905(3) 0.7420(2) 0.25915(16) 0.0229(6) Uani 1 1 d . . . 
N2 N 0.2564(3) 0.1116(3) 0.1159(2) 0.0361(7) Uani 1 1 d . . . 
N3 N 0.3281(3) 0.1429(3) 0.26244(19) 0.0345(7) Uani 1 1 d . . . 
N4 N 0.0347(3) 0.3346(3) 0.13574(18) 0.0282(7) Uani 1 1 d . . . 
N5 N -0.0032(3) 0.0284(3) 0.34096(18) 0.0285(7) Uani 1 1 d . . . 
O1 O 0.3327(3) 0.0988(3) 0.05584(17) 0.0498(8) Uani 1 1 d . . . 
O2 O 0.4426(3) 0.1422(3) 0.27461(18) 0.0471(7) Uani 1 1 d . . . 
O3 O 0.1473(2) 0.3202(2) 0.16999(15) 0.0306(6) Uani 1 1 d . . . 
O4 O -0.0070(3) 0.4355(2) 0.09829(17) 0.0415(7) Uani 1 1 d . . . 
O5 O -0.0221(3) 0.2435(2) 0.14176(16) 0.0353(6) Uani 1 1 d . . . 
O6 O 0.0798(2) -0.0023(2) 0.28056(15) 0.0317(6) Uani 1 1 d . . . 
O7 O 0.0011(3) 0.1326(2) 0.34035(17) 0.0391(6) Uani 1 1 d . . . 
O8 O -0.0811(3) -0.0437(2) 0.39355(16) 0.0405(7) Uani 1 1 d . . . 
P1 P 0.33770(8) 0.64192(7) 0.23042(5) 0.0213(2) Uani 1 1 d . . . 
P2 P 0.51853(8) 0.76296(7) 0.29752(5) 0.0201(2) Uani 1 1 d . . . 
C1 C 0.2613(3) 0.5233(3) 0.3221(2) 0.0222(7) Uani 1 1 d . . . 
C2 C 0.2314(3) 0.4166(3) 0.3126(2) 0.0262(8) Uani 1 1 d . . . 
H2 H 0.2554 0.4043 0.2577 0.031 Uiso 1 1 calc R . . 
C3 C 0.1669(4) 0.3284(3) 0.3830(2) 0.0291(8) Uani 1 1 d . . . 
H3 H 0.1464 0.2562 0.3761 0.035 Uiso 1 1 calc R . . 
C4 C 0.1326(3) 0.3456(3) 0.4629(2) 0.0284(8) Uani 1 1 d . . . 
H4 H 0.0888 0.2850 0.5110 0.034 Uiso 1 1 calc R . . 
C5 C 0.1616(3) 0.4509(3) 0.4736(2) 0.0277(8) Uani 1 1 d . . . 
H5 H 0.1380 0.4622 0.5289 0.033 Uiso 1 1 calc R . . 
C6 C 0.2251(3) 0.5395(3) 0.4035(2) 0.0248(7) Uani 1 1 d . . . 
H6 H 0.2442 0.6118 0.4109 0.030 Uiso 1 1 calc R . . 
C7 C 0.2047(3) 0.7130(3) 0.16516(19) 0.0218(7) Uani 1 1 d . . . 
C8 C 0.1487(3) 0.6517(3) 0.1205(2) 0.0254(7) Uani 1 1 d . . . 
H8 H 0.1829 0.5732 0.1223 0.030 Uiso 1 1 calc R . . 
C9 C 0.0426(3) 0.7073(3) 0.0734(2) 0.0282(8) Uani 1 1 d . . . 
H9 H 0.0046 0.6667 0.0426 0.034 Uiso 1 1 calc R . . 
C10 C -0.0081(4) 0.8213(3) 0.0712(2) 0.0292(8) Uani 1 1 d . . . 
H10 H -0.0807 0.8584 0.0389 0.035 Uiso 1 1 calc R . . 
C11 C 0.0458(4) 0.8814(3) 0.1156(2) 0.0311(8) Uani 1 1 d . . . 
H11 H 0.0103 0.9596 0.1140 0.037 Uiso 1 1 calc R . . 
C12 C 0.1523(3) 0.8272(3) 0.1628(2) 0.0275(8) Uani 1 1 d . . . 
H12 H 0.1894 0.8684 0.1936 0.033 Uiso 1 1 calc R . . 
C13 C 0.4578(3) 0.7989(3) 0.39640(19) 0.0208(7) Uani 1 1 d . . . 
C14 C 0.3232(3) 0.8489(3) 0.4086(2) 0.0246(7) Uani 1 1 d . . . 
H14 H 0.2625 0.8562 0.3683 0.029 Uiso 1 1 calc R . . 
C15 C 0.2788(4) 0.8880(3) 0.4803(2) 0.0302(8) Uani 1 1 d . . . 
H15 H 0.1872 0.9210 0.4895 0.036 Uiso 1 1 calc R . . 
C16 C 0.3687(4) 0.8786(3) 0.5384(2) 0.0326(9) Uani 1 1 d . . . 
H16 H 0.3384 0.9062 0.5869 0.039 Uiso 1 1 calc R . . 
C17 C 0.5021(4) 0.8296(3) 0.5265(2) 0.0310(8) Uani 1 1 d . . . 
H17 H 0.5628 0.8237 0.5666 0.037 Uiso 1 1 calc R . . 
C18 C 0.5474(4) 0.7887(3) 0.4556(2) 0.0266(8) Uani 1 1 d . . . 
H18 H 0.6385 0.7542 0.4475 0.032 Uiso 1 1 calc R . . 
C19 C 0.6072(3) 0.8911(3) 0.2243(2) 0.0224(7) Uani 1 1 d . . . 
C20 C 0.6942(4) 0.9503(3) 0.2542(2) 0.0303(8) Uani 1 1 d . . . 
H20 H 0.7110 0.9194 0.3127 0.036 Uiso 1 1 calc R . . 
C21 C 0.7550(4) 1.0529(3) 0.1992(2) 0.0332(8) Uani 1 1 d . . . 
H21 H 0.8126 1.0928 0.2200 0.040 Uiso 1 1 calc R . . 
C22 C 0.7321(4) 1.0976(3) 0.1139(2) 0.0326(8) Uani 1 1 d . . . 
H22 H 0.7732 1.1688 0.0762 0.039 Uiso 1 1 calc R . . 
C23 C 0.6497(4) 1.0389(3) 0.0836(2) 0.0380(9) Uani 1 1 d . . . 
H23 H 0.6365 1.0687 0.0244 0.046 Uiso 1 1 calc R . . 
C24 C 0.5856(4) 0.9366(3) 0.1385(2) 0.0318(8) Uani 1 1 d . . . 
H24 H 0.5271 0.8979 0.1172 0.038 Uiso 1 1 calc R . . 
C25 C 0.6410(3) 0.6375(3) 0.32063(19) 0.0216(7) Uani 1 1 d . . . 
C26 C 0.7695(3) 0.6369(3) 0.2678(2) 0.0287(8) Uani 1 1 d . . . 
H26 H 0.7990 0.7077 0.2232 0.034 Uiso 1 1 calc R . . 
C27 C 0.8539(4) 0.5324(3) 0.2809(2) 0.0335(8) Uani 1 1 d . . . 
H27 H 0.9409 0.5320 0.2449 0.040 Uiso 1 1 calc R . . 
C28 C 0.8113(3) 0.4285(3) 0.3463(2) 0.0275(8) Uani 1 1 d . . . 
H28 H 0.8679 0.3569 0.3543 0.033 Uiso 1 1 calc R . . 
C29 C 0.6857(3) 0.4303(3) 0.3998(2) 0.0266(8) Uani 1 1 d . . . 
H29 H 0.6579 0.3602 0.4458 0.032 Uiso 1 1 calc R . . 
C30 C 0.6005(3) 0.5334(3) 0.38678(19) 0.0220(7) Uani 1 1 d . . . 
H30 H 0.5138 0.5331 0.4231 0.026 Uiso 1 1 calc R . . 
C31 C 0.4667(3) 0.5754(3) 0.1657(2) 0.0248(7) Uani 1 1 d . . . 
C32 C 0.5013(4) 0.6380(3) 0.0768(2) 0.0315(8) Uani 1 1 d . . . 
H32 H 0.4516 0.7105 0.0511 0.038 Uiso 1 1 calc R . . 
C33 C 0.6087(4) 0.5931(4) 0.0265(2) 0.0389(9) Uani 1 1 d . . . 
H33 H 0.6317 0.6346 -0.0337 0.047 Uiso 1 1 calc R . . 
C34 C 0.6817(4) 0.4886(4) 0.0643(2) 0.0389(9) Uani 1 1 d . . . 
H34 H 0.7557 0.4590 0.0300 0.047 Uiso 1 1 calc R . . 
C35 C 0.6485(4) 0.4265(4) 0.1515(2) 0.0371(9) Uani 1 1 d . . . 
H35 H 0.6992 0.3544 0.1767 0.044 Uiso 1 1 calc R . . 
C36 C 0.5414(4) 0.4690(3) 0.2024(2) 0.0301(8) Uani 1 1 d . . . 
H36 H 0.5185 0.4258 0.2624 0.036 Uiso 1 1 calc R . . 
 
loop_ 
 _atom_site_aniso_label 
 _atom_site_aniso_U_11 
 _atom_site_aniso_U_22 
 _atom_site_aniso_U_33 
 _atom_site_aniso_U_23 
 _atom_site_aniso_U_13 
 _atom_site_aniso_U_12 
Fe1 0.0339(3) 0.0212(3) 0.0323(3) -0.0107(2) -0.0039(2) 0.0001(2) 
N1 0.0241(15) 0.0169(15) 0.0293(14) -0.0105(12) -0.0039(11) 0.0017(11) 
N2 0.0446(19) 0.0259(18) 0.0374(17) -0.0119(14) -0.0016(15) -0.0013(14) 
N3 0.0381(19) 0.0251(18) 0.0404(17) -0.0116(14) -0.0071(14) 0.0039(14) 
N4 0.0290(16) 0.0234(17) 0.0305(15) -0.0066(13) -0.0039(13) -0.0011(13) 
N5 0.0334(17) 0.0220(16) 0.0307(15) -0.0106(13) -0.0037(13) 0.0019(13) 
O1 0.0614(19) 0.0433(18) 0.0414(16) -0.0188(13) 0.0086(14) 0.0009(14) 
O2 0.0367(17) 0.0503(19) 0.0580(18) -0.0211(14) -0.0141(14) 0.0058(13) 
O3 0.0335(14) 0.0254(14) 0.0363(13) -0.0128(11) -0.0100(11) 0.0019(11) 
O4 0.0438(16) 0.0240(15) 0.0520(16) -0.0049(12) -0.0120(13) 0.0028(12) 
O5 0.0385(15) 0.0229(14) 0.0446(15) -0.0075(11) -0.0058(12) -0.0129(11) 
O6 0.0354(14) 0.0276(14) 0.0335(13) -0.0158(11) 0.0008(11) 0.0015(11) 
O7 0.0433(16) 0.0240(15) 0.0519(16) -0.0187(12) 0.0013(12) -0.0026(12) 
O8 0.0442(16) 0.0332(16) 0.0373(14) -0.0055(12) 0.0057(12) -0.0122(13) 
P1 0.0235(5) 0.0153(5) 0.0249(4) -0.0073(3) -0.0028(3) 0.0011(3) 
P2 0.0232(5) 0.0135(4) 0.0219(4) -0.0043(3) -0.0013(3) -0.0007(3) 
C1 0.0215(17) 0.0188(17) 0.0258(16) -0.0061(13) -0.0067(13) 0.0029(13) 
C2 0.0312(19) 0.0201(18) 0.0272(17) -0.0065(14) -0.0074(14) -0.0001(14) 
C3 0.034(2) 0.0144(18) 0.0375(19) -0.0050(15) -0.0094(16) -0.0007(15) 
C4 0.0281(19) 0.0200(19) 0.0317(18) -0.0012(14) -0.0052(15) -0.0004(14) 
C5 0.0286(19) 0.0263(19) 0.0267(17) -0.0068(14) -0.0030(14) -0.0023(15) 
C6 0.0235(17) 0.0199(18) 0.0293(17) -0.0057(14) -0.0042(14) -0.0006(14) 
C7 0.0210(17) 0.0202(18) 0.0216(16) -0.0059(13) 0.0014(13) -0.0010(13) 
C8 0.0280(18) 0.0192(18) 0.0264(17) -0.0051(14) -0.0010(14) -0.0023(14) 
C9 0.0310(19) 0.027(2) 0.0231(17) -0.0015(14) -0.0049(14) -0.0058(15) 
C10 0.0271(18) 0.028(2) 0.0243(17) 0.0010(15) -0.0037(14) 0.0014(15) 
C11 0.032(2) 0.0232(19) 0.0315(18) -0.0043(15) 0.0006(15) 0.0027(15) 
C12 0.0300(19) 0.0218(19) 0.0302(18) -0.0104(15) -0.0024(14) 0.0036(15) 
C13 0.0278(17) 0.0090(16) 0.0229(16) -0.0021(12) -0.0014(13) -0.0024(13) 
C14 0.0296(18) 0.0129(17) 0.0260(17) -0.0027(13) 0.0000(14) 0.0026(14) 
C15 0.037(2) 0.0188(19) 0.0298(18) -0.0074(14) 0.0049(15) 0.0026(15) 
C16 0.049(2) 0.022(2) 0.0284(18) -0.0128(15) 0.0010(16) -0.0024(17) 
C17 0.041(2) 0.0250(19) 0.0293(18) -0.0099(15) -0.0053(15) -0.0085(16) 
C18 0.0295(18) 0.0192(18) 0.0286(17) -0.0055(14) -0.0014(14) -0.0032(14) 
C19 0.0238(17) 0.0147(17) 0.0270(17) -0.0065(13) -0.0015(13) 0.0025(13) 
C20 0.033(2) 0.0234(19) 0.0310(19) -0.0031(15) -0.0051(15) -0.0031(15) 
C21 0.030(2) 0.023(2) 0.042(2) -0.0051(16) -0.0015(16) -0.0048(15) 
C22 0.0309(19) 0.0197(19) 0.038(2) -0.0034(15) 0.0068(16) -0.0024(15) 
C23 0.055(3) 0.026(2) 0.0247(18) 0.0012(15) -0.0026(17) -0.0035(18) 
C24 0.042(2) 0.025(2) 0.0274(18) -0.0054(15) -0.0050(15) -0.0067(16) 
C25 0.0233(17) 0.0167(17) 0.0238(16) -0.0068(13) -0.0025(13) 0.0021(13) 
C26 0.0299(19) 0.0193(18) 0.0311(18) -0.0030(14) 0.0012(15) -0.0021(15) 
C27 0.0293(19) 0.028(2) 0.0356(19) -0.0070(16) 0.0069(15) 0.0012(15) 
C28 0.0286(19) 0.0202(18) 0.0343(18) -0.0107(15) -0.0059(15) 0.0045(14) 
C29 0.034(2) 0.0165(18) 0.0254(17) -0.0017(14) -0.0037(14) -0.0038(15) 
C30 0.0243(17) 0.0174(17) 0.0225(16) -0.0056(13) -0.0010(13) -0.0009(13) 
C31 0.0235(17) 0.0214(18) 0.0337(18) -0.0144(15) -0.0052(14) 0.0007(14) 
C32 0.033(2) 0.027(2) 0.0321(19) -0.0100(15) 0.0004(15) -0.0021(16) 
C33 0.036(2) 0.042(2) 0.039(2) -0.0194(18) 0.0097(17) -0.0046(18) 
C34 0.0254(19) 0.051(3) 0.050(2) -0.033(2) -0.0013(17) 0.0040(18) 
C35 0.034(2) 0.039(2) 0.047(2) -0.0259(19) -0.0137(17) 0.0146(17) 
C36 0.034(2) 0.028(2) 0.0323(19) -0.0167(16) -0.0074(15) 0.0053(16) 
 
_geom_special_details 
; 
 All esds (except the esd in the dihedral angle between two l.s. planes) 
 are estimated using the full covariance matrix.  The cell esds are taken 
 into account individually in the estimation of esds in distances, angles 
 and torsion angles; correlations between esds in cell parameters are only 
 used when they are defined by crystal symmetry.  An approximate (isotropic) 
 treatment of cell esds is used for estimating esds involving l.s. planes. 
; 
 
loop_ 
 _geom_bond_atom_site_label_1 
 _geom_bond_atom_site_label_2 
 _geom_bond_distance 
 _geom_bond_site_symmetry_2 
 _geom_bond_publ_flag 
Fe1 N2 1.701(3) . ? 
Fe1 N3 1.704(3) . ? 
Fe1 O3 2.029(2) . ? 
Fe1 O6 2.049(2) . ? 
N1 P1 1.584(3) . ? 
N1 P2 1.585(3) . ? 
N2 O1 1.172(4) . ? 
N3 O2 1.178(4) . ? 
N4 O4 1.218(4) . ? 
N4 O5 1.240(4) . ? 
N4 O3 1.302(4) . ? 
N5 O8 1.220(4) . ? 
N5 O7 1.241(4) . ? 
N5 O6 1.295(3) . ? 
P1 C31 1.797(3) . ? 
P1 C7 1.803(3) . ? 
P1 C1 1.804(3) . ? 
P2 C25 1.794(3) . ? 
P2 C19 1.799(3) . ? 
P2 C13 1.805(3) . ? 
C1 C2 1.397(5) . ? 
C1 C6 1.398(4) . ? 
C2 C3 1.389(5) . ? 
C2 H2 0.9500 . ? 
C3 C4 1.376(5) . ? 
C3 H3 0.9500 . ? 
C4 C5 1.387(5) . ? 
C4 H4 0.9500 . ? 
C5 C6 1.384(4) . ? 
C5 H5 0.9500 . ? 
C6 H6 0.9500 . ? 
C7 C12 1.389(5) . ? 
C7 C8 1.403(4) . ? 
C8 C9 1.389(5) . ? 
C8 H8 0.9500 . ? 
C9 C10 1.383(5) . ? 
C9 H9 0.9500 . ? 
C10 C11 1.378(5) . ? 
C10 H10 0.9500 . ? 
C11 C12 1.391(5) . ? 
C11 H11 0.9500 . ? 
C12 H12 0.9500 . ? 
C13 C18 1.398(4) . ? 
C13 C14 1.399(4) . ? 
C14 C15 1.392(5) . ? 
C14 H14 0.9500 . ? 
C15 C16 1.389(5) . ? 
C15 H15 0.9500 . ? 
C16 C17 1.385(5) . ? 
C16 H16 0.9500 . ? 
C17 C18 1.394(5) . ? 
C17 H17 0.9500 . ? 
C18 H18 0.9500 . ? 
C19 C24 1.386(4) . ? 
C19 C20 1.410(5) . ? 
C20 C21 1.379(5) . ? 
C20 H20 0.9500 . ? 
C21 C22 1.382(5) . ? 
C21 H21 0.9500 . ? 
C22 C23 1.378(5) . ? 
C22 H22 0.9500 . ? 
C23 C24 1.391(5) . ? 
C23 H23 0.9500 . ? 
C24 H24 0.9500 . ? 
C25 C30 1.394(4) . ? 
C25 C26 1.401(5) . ? 
C26 C27 1.394(5) . ? 
C26 H26 0.9500 . ? 
C27 C28 1.391(5) . ? 
C27 H27 0.9500 . ? 
C28 C29 1.386(5) . ? 
C28 H28 0.9500 . ? 
C29 C30 1.385(5) . ? 
C29 H29 0.9500 . ? 
C30 H30 0.9500 . ? 
C31 C36 1.399(5) . ? 
C31 C32 1.406(5) . ? 
C32 C33 1.394(5) . ? 
C32 H32 0.9500 . ? 
C33 C34 1.380(5) . ? 
C33 H33 0.9500 . ? 
C34 C35 1.379(5) . ? 
C34 H34 0.9500 . ? 
C35 C36 1.384(5) . ? 
C35 H35 0.9500 . ? 
C36 H36 0.9500 . ? 
 
loop_ 
 _geom_angle_atom_site_label_1 
 _geom_angle_atom_site_label_2 
 _geom_angle_atom_site_label_3 
 _geom_angle 
 _geom_angle_site_symmetry_1 
 _geom_angle_site_symmetry_3 
 _geom_angle_publ_flag 
N2 Fe1 N3 109.71(15) . . ? 
N2 Fe1 O3 103.60(12) . . ? 
N3 Fe1 O3 97.87(12) . . ? 
N2 Fe1 O6 102.71(12) . . ? 
N3 Fe1 O6 108.91(12) . . ? 
O3 Fe1 O6 132.94(10) . . ? 
P1 N1 P2 138.66(18) . . ? 
O1 N2 Fe1 161.3(3) . . ? 
O2 N3 Fe1 159.4(3) . . ? 
O4 N4 O5 123.8(3) . . ? 
O4 N4 O3 118.7(3) . . ? 
O5 N4 O3 117.4(3) . . ? 
O8 N5 O7 124.0(3) . . ? 
O8 N5 O6 119.6(3) . . ? 
O7 N5 O6 116.4(3) . . ? 
N4 O3 Fe1 106.03(18) . . ? 
N5 O6 Fe1 106.77(19) . . ? 
N1 P1 C31 115.03(15) . . ? 
N1 P1 C7 106.51(15) . . ? 
C31 P1 C7 107.23(15) . . ? 
N1 P1 C1 112.17(14) . . ? 
C31 P1 C1 107.85(15) . . ? 
C7 P1 C1 107.71(14) . . ? 
N1 P2 C25 114.06(15) . . ? 
N1 P2 C19 110.37(14) . . ? 
C25 P2 C19 108.78(15) . . ? 
N1 P2 C13 109.53(14) . . ? 
C25 P2 C13 108.34(14) . . ? 
C19 P2 C13 105.38(14) . . ? 
C2 C1 C6 118.8(3) . . ? 
C2 C1 P1 121.1(2) . . ? 
C6 C1 P1 120.0(2) . . ? 
C3 C2 C1 120.4(3) . . ? 
C3 C2 H2 119.8 . . ? 
C1 C2 H2 119.8 . . ? 
C4 C3 C2 120.0(3) . . ? 
C4 C3 H3 120.0 . . ? 
C2 C3 H3 120.0 . . ? 
C3 C4 C5 120.5(3) . . ? 
C3 C4 H4 119.8 . . ? 
C5 C4 H4 119.8 . . ? 
C6 C5 C4 119.8(3) . . ? 
C6 C5 H5 120.1 . . ? 
C4 C5 H5 120.1 . . ? 
C5 C6 C1 120.5(3) . . ? 
C5 C6 H6 119.7 . . ? 
C1 C6 H6 119.7 . . ? 
C12 C7 C8 119.7(3) . . ? 
C12 C7 P1 119.6(2) . . ? 
C8 C7 P1 120.6(3) . . ? 
C9 C8 C7 119.2(3) . . ? 
C9 C8 H8 120.4 . . ? 
C7 C8 H8 120.4 . . ? 
C10 C9 C8 120.5(3) . . ? 
C10 C9 H9 119.8 . . ? 
C8 C9 H9 119.8 . . ? 
C11 C10 C9 120.5(3) . . ? 
C11 C10 H10 119.7 . . ? 
C9 C10 H10 119.7 . . ? 
C10 C11 C12 119.7(3) . . ? 
C10 C11 H11 120.1 . . ? 
C12 C11 H11 120.1 . . ? 
C7 C12 C11 120.3(3) . . ? 
C7 C12 H12 119.9 . . ? 
C11 C12 H12 119.9 . . ? 
C18 C13 C14 120.2(3) . . ? 
C18 C13 P2 120.8(2) . . ? 
C14 C13 P2 118.7(2) . . ? 
C15 C14 C13 119.6(3) . . ? 
C15 C14 H14 120.2 . . ? 
C13 C14 H14 120.2 . . ? 
C16 C15 C14 119.9(3) . . ? 
C16 C15 H15 120.1 . . ? 
C14 C15 H15 120.1 . . ? 
C17 C16 C15 120.7(3) . . ? 
C17 C16 H16 119.6 . . ? 
C15 C16 H16 119.6 . . ? 
C16 C17 C18 120.0(3) . . ? 
C16 C17 H17 120.0 . . ? 
C18 C17 H17 120.0 . . ? 
C17 C18 C13 119.6(3) . . ? 
C17 C18 H18 120.2 . . ? 
C13 C18 H18 120.2 . . ? 
C24 C19 C20 118.9(3) . . ? 
C24 C19 P2 120.4(3) . . ? 
C20 C19 P2 120.6(2) . . ? 
C21 C20 C19 120.4(3) . . ? 
C21 C20 H20 119.8 . . ? 
C19 C20 H20 119.8 . . ? 
C20 C21 C22 120.1(3) . . ? 
C20 C21 H21 119.9 . . ? 
C22 C21 H21 119.9 . . ? 
C23 C22 C21 119.9(3) . . ? 
C23 C22 H22 120.1 . . ? 
C21 C22 H22 120.1 . . ? 
C22 C23 C24 120.8(3) . . ? 
C22 C23 H23 119.6 . . ? 
C24 C23 H23 119.6 . . ? 
C19 C24 C23 119.8(3) . . ? 
C19 C24 H24 120.1 . . ? 
C23 C24 H24 120.1 . . ? 
C30 C25 C26 119.2(3) . . ? 
C30 C25 P2 118.7(2) . . ? 
C26 C25 P2 121.7(2) . . ? 
C27 C26 C25 119.9(3) . . ? 
C27 C26 H26 120.0 . . ? 
C25 C26 H26 120.0 . . ? 
C28 C27 C26 120.3(3) . . ? 
C28 C27 H27 119.9 . . ? 
C26 C27 H27 119.9 . . ? 
C29 C28 C27 119.6(3) . . ? 
C29 C28 H28 120.2 . . ? 
C27 C28 H28 120.2 . . ? 
C30 C29 C28 120.5(3) . . ? 
C30 C29 H29 119.7 . . ? 
C28 C29 H29 119.7 . . ? 
C29 C30 C25 120.4(3) . . ? 
C29 C30 H30 119.8 . . ? 
C25 C30 H30 119.8 . . ? 
C36 C31 C32 119.3(3) . . ? 
C36 C31 P1 122.0(3) . . ? 
C32 C31 P1 118.5(3) . . ? 
C33 C32 C31 119.6(3) . . ? 
C33 C32 H32 120.2 . . ? 
C31 C32 H32 120.2 . . ? 
C34 C33 C32 120.0(4) . . ? 
C34 C33 H33 120.0 . . ? 
C32 C33 H33 120.0 . . ? 
C35 C34 C33 120.7(3) . . ? 
C35 C34 H34 119.6 . . ? 
C33 C34 H34 119.6 . . ? 
C34 C35 C36 120.2(3) . . ? 
C34 C35 H35 119.9 . . ? 
C36 C35 H35 119.9 . . ? 
C35 C36 C31 120.1(3) . . ? 
C35 C36 H36 120.0 . . ? 
C31 C36 H36 120.0 . . ? 
 
_diffrn_measured_fraction_theta_max    0.966 
_diffrn_reflns_theta_full              25.00 
_diffrn_measured_fraction_theta_full   0.973 
_refine_diff_density_max    0.784 
_refine_diff_density_min   -0.725 
_refine_diff_density_rms    0.210 


complex 3   ===END

complex 4
 
data_120731lt_0m 
 
_audit_creation_method            SHELXL-97 
_chemical_name_systematic 
; 
 ? 
; 
_chemical_name_common             ? 
_chemical_melting_point           ? 
_chemical_formula_moiety          ? 
_chemical_formula_sum 
 'C36 H30 Fe N5 O7 P2' 
_chemical_formula_weight          762.44 
 
loop_ 
 _atom_type_symbol 
 _atom_type_description 
 _atom_type_scat_dispersion_real 
 _atom_type_scat_dispersion_imag 
 _atom_type_scat_source 
 'C'  'C'   0.0033   0.0016 
 'International Tables Vol C Tables 4.2.6.8 and 6.1.1.4' 
 'H'  'H'   0.0000   0.0000 
 'International Tables Vol C Tables 4.2.6.8 and 6.1.1.4' 
 'N'  'N'   0.0061   0.0033 
 'International Tables Vol C Tables 4.2.6.8 and 6.1.1.4' 
 'O'  'O'   0.0106   0.0060 
 'International Tables Vol C Tables 4.2.6.8 and 6.1.1.4' 
 'P'  'P'   0.1023   0.0942 
 'International Tables Vol C Tables 4.2.6.8 and 6.1.1.4' 
 'Fe'  'Fe'   0.3463   0.8444 
 'International Tables Vol C Tables 4.2.6.8 and 6.1.1.4' 
 
_symmetry_cell_setting            triclinic
_symmetry_space_group_name_H-M   'P -1'
_symmetry_space_group_name_hall  '-P 1'
 
loop_ 
 _symmetry_equiv_pos_as_xyz 
 'x, y, z' 
 '-x, -y, -z' 
 
_cell_length_a                    9.7749(7) 
_cell_length_b                    11.7024(9) 
_cell_length_c                    16.6531(12) 
_cell_angle_alpha                 70.212(3) 
_cell_angle_beta                  79.947(4) 
_cell_angle_gamma                 83.221(4) 
_cell_volume                      1761.4(2) 
_cell_formula_units_Z             2 
_cell_measurement_temperature     100(2) 
_cell_measurement_reflns_used     8148
_cell_measurement_theta_min       2.3278
_cell_measurement_theta_max       26.2139
 
_exptl_crystal_description        Columnar
_exptl_crystal_colour             Black
_exptl_crystal_size_max           0.25
_exptl_crystal_size_mid           0.10
_exptl_crystal_size_min           0.08
_exptl_crystal_density_meas       'not measured' 
_exptl_crystal_density_diffrn     1.438 
_exptl_crystal_density_method     'not measured' 
_exptl_crystal_F_000              786 
_exptl_absorpt_coefficient_mu     0.575 
_exptl_absorpt_correction_type    multi-scan
_exptl_absorpt_correction_T_min   0.7898  
_exptl_absorpt_correction_T_max   0.9486
_exptl_absorpt_process_details    'SADABS V2008/1 (Bruker AXS)'
 
_exptl_special_details 
; 
 ? 
; 
 
_diffrn_ambient_temperature       100(2) 
_diffrn_radiation_wavelength      0.71073 
_diffrn_radiation_type            MoK\a 
_diffrn_radiation_source          'fine-focus sealed tube' 
_diffrn_radiation_monochromator   graphite 
_diffrn_measurement_device_type   'Bruker APEX-II CCD'
_diffrn_measurement_method        '\f and \w scans'
_diffrn_detector_area_resol_mean  8.3333
_diffrn_reflns_number             24439 
_diffrn_reflns_av_R_equivalents   0.0402 
_diffrn_reflns_av_sigmaI/netI     0.0457 
_diffrn_reflns_limit_h_min        -12 
_diffrn_reflns_limit_h_max        9 
_diffrn_reflns_limit_k_min        -14 
_diffrn_reflns_limit_k_max        14 
_diffrn_reflns_limit_l_min        -20 
_diffrn_reflns_limit_l_max        20 
_diffrn_reflns_theta_min          1.31 
_diffrn_reflns_theta_max          26.41 
_reflns_number_total              6995 
_reflns_number_gt                 5446 
_reflns_threshold_expression      >2sigma(I) 
 
_computing_data_collection        'APEX2 (Bruker AXS, 2010)'
_computing_cell_refinement        'SAINT V7.68A (Bruker AXS, 2009)'
_computing_data_reduction         'SAINT V7.68A (Bruker AXS, 2009)'
_computing_structure_solution     'SHELXS-97 (Sheldrick, 2008)'
_computing_structure_refinement   'SHELXL-97 (Sheldrick, 2008)'
_computing_molecular_graphics     'SHELXTL (Sheldrick, 2008)'
_computing_publication_material   'SHELXTL' 
 
_refine_special_details 
; 
 Refinement of F^2^ against ALL reflections.  The weighted R-factor wR and 
 goodness of fit S are based on F^2^, conventional R-factors R are based 
 on F, with F set to zero for negative F^2^. The threshold expression of 
 F^2^ > 2sigma(F^2^) is used only for calculating R-factors(gt) etc. and is 
 not relevant to the choice of reflections for refinement.  R-factors based 
 on F^2^ are statistically about twice as large as those based on F, and R- 
 factors based on ALL data will be even larger. 
; 
 
_refine_ls_structure_factor_coef  Fsqd  
_refine_ls_matrix_type            full 
_refine_ls_weighting_scheme       calc  
_refine_ls_weighting_details 
 'calc w=1/[\s^2^(Fo^2^)+(0.0664P)^2^+2.3593P] where P=(Fo^2^+2Fc^2^)/3' 
_atom_sites_solution_primary      direct 
_atom_sites_solution_secondary    difmap 
_atom_sites_solution_hydrogens    geom 
_refine_ls_hydrogen_treatment     constr
_refine_ls_extinction_method      none 
_refine_ls_extinction_coef        ? 
_refine_ls_number_reflns          6995 
_refine_ls_number_parameters      460 
_refine_ls_number_restraints      0 
_refine_ls_R_factor_all           0.0690 
_refine_ls_R_factor_gt            0.0505 
_refine_ls_wR_factor_ref          0.1412 
_refine_ls_wR_factor_gt           0.1284 
_refine_ls_goodness_of_fit_ref    1.048 
_refine_ls_restrained_S_all       1.048 
_refine_ls_shift/su_max           0.001 
_refine_ls_shift/su_mean          0.000 
 
loop_ 
 _atom_site_label 
 _atom_site_type_symbol 
 _atom_site_fract_x 
 _atom_site_fract_y 
 _atom_site_fract_z 
 _atom_site_U_iso_or_equiv 
 _atom_site_adp_type 
 _atom_site_occupancy 
 _atom_site_symmetry_multiplicity 
 _atom_site_calc_flag 
 _atom_site_refinement_flags 
 _atom_site_disorder_assembly 
 _atom_site_disorder_group 
Fe1 Fe 0.18279(5) 0.15381(4) 0.20245(3) 0.02806(15) Uani 1 1 d . . . 
P1 P 0.51255(8) 0.76770(6) 0.29625(4) 0.01602(17) Uani 1 1 d . . . 
P2 P 0.33494(8) 0.63876(6) 0.23209(4) 0.01726(17) Uani 1 1 d . . . 
N1 N 0.3844(3) 0.7433(2) 0.25927(15) 0.0206(5) Uani 1 1 d . . . 
N2 N 0.3178(3) 0.1516(2) 0.25528(18) 0.0318(6) Uani 1 1 d . . . 
N3 N 0.2430(3) 0.1217(2) 0.10959(18) 0.0344(7) Uani 1 1 d . . . 
N4 N -0.0096(3) 0.0336(2) 0.33515(17) 0.0293(6) Uani 1 1 d . . . 
N5 N 0.0250(3) 0.3586(3) 0.13119(18) 0.0326(6) Uani 1 1 d . . . 
O1 O 0.4307(3) 0.1477(2) 0.27164(18) 0.0444(6) Uani 1 1 d . . . 
O2 O 0.3202(3) 0.1073(2) 0.05087(16) 0.0490(7) Uani 1 1 d . . . 
O3 O 0.0687(3) 0.0074(2) 0.27220(15) 0.0351(6) Uani 1 1 d . . . 
O4 O -0.0065(3) 0.1369(2) 0.33737(18) 0.0457(7) Uani 1 1 d . . . 
O5 O 0.1393(3) 0.3383(2) 0.16048(15) 0.0344(5) Uani 1 1 d . . . 
O6 O -0.0301(3) 0.2665(2) 0.13645(17) 0.0424(6) Uani 1 1 d . . . 
O7 O -0.0802(4) -0.0454(3) 0.3860(2) 0.0661(9) Uani 1 1 d . . . 
C1 C 0.6381(3) 0.6407(2) 0.32082(17) 0.0171(6) Uani 1 1 d . . . 
C2 C 0.5987(3) 0.5353(2) 0.38867(17) 0.0189(6) Uani 1 1 d . . . 
H2 H 0.5121 0.5360 0.4247 0.023 Uiso 1 1 calc R . . 
C3 C 0.6852(3) 0.4303(3) 0.40344(18) 0.0213(6) Uani 1 1 d . . . 
H3 H 0.6584 0.3595 0.4500 0.026 Uiso 1 1 calc R . . 
C4 C 0.8112(3) 0.4281(3) 0.35034(19) 0.0241(6) Uani 1 1 d . . . 
H4 H 0.8695 0.3552 0.3595 0.029 Uiso 1 1 calc R . . 
C5 C 0.8513(3) 0.5326(3) 0.2839(2) 0.0298(7) Uani 1 1 d . . . 
H5 H 0.9384 0.5313 0.2483 0.036 Uiso 1 1 calc R . . 
C6 C 0.7664(3) 0.6386(3) 0.26868(19) 0.0245(7) Uani 1 1 d . . . 
H6 H 0.7951 0.7097 0.2230 0.029 Uiso 1 1 calc R . . 
C7 C 0.5999(3) 0.8975(2) 0.22170(17) 0.0196(6) Uani 1 1 d . . . 
C8 C 0.6889(3) 0.9573(3) 0.2484(2) 0.0269(7) Uani 1 1 d . . . 
H8 H 0.7079 0.9271 0.3062 0.032 Uiso 1 1 calc R . . 
C9 C 0.7500(3) 1.0608(3) 0.1911(2) 0.0312(7) Uani 1 1 d . . . 
H9 H 0.8104 1.1014 0.2097 0.037 Uiso 1 1 calc R . . 
C10 C 0.7231(3) 1.1043(3) 0.1076(2) 0.0302(8) Uani 1 1 d . . . 
H10 H 0.7634 1.1763 0.0688 0.036 Uiso 1 1 calc R . . 
C11 C 0.6385(4) 1.0447(3) 0.0799(2) 0.0374(9) Uani 1 1 d . . . 
H11 H 0.6228 1.0743 0.0214 0.045 Uiso 1 1 calc R . . 
C12 C 0.5752(4) 0.9414(3) 0.13628(19) 0.0315(8) Uani 1 1 d . . . 
H12 H 0.5156 0.9011 0.1168 0.038 Uiso 1 1 calc R . . 
C13 C 0.4513(3) 0.8064(2) 0.39311(17) 0.0178(6) Uani 1 1 d . . . 
C14 C 0.5406(3) 0.7971(3) 0.45175(18) 0.0233(6) Uani 1 1 d . . . 
H14 H 0.6334 0.7638 0.4436 0.028 Uiso 1 1 calc R . . 
C15 C 0.4942(4) 0.8365(3) 0.52244(19) 0.0271(7) Uani 1 1 d . . . 
H15 H 0.5553 0.8303 0.5625 0.032 Uiso 1 1 calc R . . 
C16 C 0.3587(4) 0.8849(3) 0.53428(19) 0.0301(8) Uani 1 1 d . . . 
H16 H 0.3274 0.9124 0.5823 0.036 Uiso 1 1 calc R . . 
C17 C 0.2684(4) 0.8934(3) 0.47650(19) 0.0269(7) Uani 1 1 d . . . 
H17 H 0.1753 0.9256 0.4854 0.032 Uiso 1 1 calc R . . 
C18 C 0.3146(3) 0.8546(2) 0.40550(18) 0.0217(6) Uani 1 1 d . . . 
H18 H 0.2533 0.8608 0.3656 0.026 Uiso 1 1 calc R . . 
C19 C 0.4684(3) 0.5689(3) 0.17104(18) 0.0209(6) Uani 1 1 d . . . 
C20 C 0.5055(4) 0.6308(3) 0.0827(2) 0.0299(7) Uani 1 1 d . . . 
H20 H 0.4556 0.7045 0.0553 0.036 Uiso 1 1 calc R . . 
C21 C 0.6156(4) 0.5839(3) 0.0357(2) 0.0375(8) Uani 1 1 d . . . 
H21 H 0.6401 0.6250 -0.0242 0.045 Uiso 1 1 calc R . . 
C22 C 0.6890(4) 0.4781(3) 0.0755(2) 0.0373(8) Uani 1 1 d . . . 
H22 H 0.7649 0.4470 0.0431 0.045 Uiso 1 1 calc R . . 
C23 C 0.6531(4) 0.4164(3) 0.1627(2) 0.0348(8) Uani 1 1 d . . . 
H23 H 0.7040 0.3431 0.1898 0.042 Uiso 1 1 calc R . . 
C24 C 0.5429(3) 0.4617(3) 0.2102(2) 0.0266(7) Uani 1 1 d . . . 
H24 H 0.5182 0.4191 0.2698 0.032 Uiso 1 1 calc R . . 
C25 C 0.2588(3) 0.5190(2) 0.32426(18) 0.0187(6) Uani 1 1 d . . . 
C26 C 0.2225(3) 0.5375(3) 0.40385(19) 0.0221(6) Uani 1 1 d . . . 
H26 H 0.2406 0.6120 0.4098 0.027 Uiso 1 1 calc R . . 
C27 C 0.1600(3) 0.4471(3) 0.47469(19) 0.0249(7) Uani 1 1 d . . . 
H27 H 0.1357 0.4599 0.5289 0.030 Uiso 1 1 calc R . . 
C28 C 0.1332(3) 0.3386(3) 0.46606(19) 0.0263(7) Uani 1 1 d . . . 
H28 H 0.0906 0.2770 0.5145 0.032 Uiso 1 1 calc R . . 
C29 C 0.1683(3) 0.3193(3) 0.38700(19) 0.0263(7) Uani 1 1 d . . . 
H29 H 0.1499 0.2447 0.3813 0.032 Uiso 1 1 calc R . . 
C30 C 0.2306(3) 0.4097(3) 0.31598(19) 0.0239(6) Uani 1 1 d . . . 
H30 H 0.2540 0.3968 0.2617 0.029 Uiso 1 1 calc R . . 
C31 C 0.2021(3) 0.7072(3) 0.16511(17) 0.0191(6) Uani 1 1 d . . . 
C32 C 0.1486(3) 0.6419(3) 0.12189(17) 0.0224(6) Uani 1 1 d . . . 
H32 H 0.1870 0.5623 0.1248 0.027 Uiso 1 1 calc R . . 
C33 C 0.0405(3) 0.6931(3) 0.07511(18) 0.0272(7) Uani 1 1 d . . . 
H33 H 0.0038 0.6487 0.0463 0.033 Uiso 1 1 calc R . . 
C34 C -0.0145(3) 0.8097(3) 0.07030(19) 0.0303(7) Uani 1 1 d . . . 
H34 H -0.0886 0.8450 0.0378 0.036 Uiso 1 1 calc R . . 
C35 C 0.0373(3) 0.8748(3) 0.1123(2) 0.0297(7) Uani 1 1 d . . . 
H35 H -0.0009 0.9547 0.1084 0.036 Uiso 1 1 calc R . . 
C36 C 0.1452(3) 0.8240(3) 0.16033(18) 0.0239(6) Uani 1 1 d . . . 
H36 H 0.1800 0.8685 0.1898 0.029 Uiso 1 1 calc R . . 
 
loop_ 
 _atom_site_aniso_label 
 _atom_site_aniso_U_11 
 _atom_site_aniso_U_22 
 _atom_site_aniso_U_33 
 _atom_site_aniso_U_23 
 _atom_site_aniso_U_13 
 _atom_site_aniso_U_12 
Fe1 0.0322(3) 0.0248(2) 0.0265(3) -0.00893(19) -0.0018(2) -0.00152(19) 
P1 0.0175(4) 0.0154(3) 0.0111(3) -0.0004(3) 0.0024(3) -0.0035(3) 
P2 0.0178(4) 0.0175(3) 0.0146(3) -0.0039(3) 0.0005(3) -0.0016(3) 
N1 0.0225(14) 0.0191(11) 0.0186(12) -0.0053(10) -0.0008(10) -0.0008(10) 
N2 0.0348(18) 0.0277(14) 0.0307(15) -0.0094(12) -0.0010(13) 0.0006(12) 
N3 0.0431(19) 0.0283(14) 0.0308(16) -0.0094(12) -0.0056(14) 0.0007(13) 
N4 0.0331(17) 0.0307(15) 0.0211(13) -0.0048(11) -0.0010(12) -0.0055(12) 
N5 0.0283(17) 0.0355(15) 0.0358(16) -0.0131(13) -0.0017(13) -0.0091(13) 
O1 0.0311(15) 0.0504(16) 0.0532(17) -0.0183(13) -0.0101(13) 0.0013(12) 
O2 0.0642(19) 0.0465(15) 0.0322(14) -0.0160(12) 0.0052(13) 0.0044(14) 
O3 0.0381(15) 0.0340(13) 0.0340(13) -0.0161(10) 0.0016(11) -0.0008(11) 
O4 0.0444(17) 0.0423(15) 0.0562(17) -0.0301(13) 0.0112(13) -0.0099(12) 
O5 0.0333(14) 0.0323(12) 0.0402(14) -0.0147(11) -0.0073(11) -0.0009(10) 
O6 0.0348(15) 0.0401(14) 0.0513(16) -0.0149(12) 0.0005(12) -0.0092(12) 
O7 0.076(2) 0.061(2) 0.0501(18) -0.0083(15) 0.0066(16) -0.0156(17) 
C1 0.0174(15) 0.0188(13) 0.0128(13) -0.0028(11) 0.0007(11) -0.0036(11) 
C2 0.0193(15) 0.0226(14) 0.0110(13) -0.0020(11) 0.0051(11) -0.0071(12) 
C3 0.0262(17) 0.0188(14) 0.0146(13) 0.0003(11) -0.0023(12) -0.0032(12) 
C4 0.0214(16) 0.0212(14) 0.0245(15) -0.0034(12) -0.0012(12) 0.0031(12) 
C5 0.0221(17) 0.0303(16) 0.0270(16) -0.0032(13) 0.0095(13) -0.0013(13) 
C6 0.0211(17) 0.0198(14) 0.0222(15) 0.0018(12) 0.0089(12) -0.0047(12) 
C7 0.0208(16) 0.0165(13) 0.0145(13) -0.0002(11) 0.0045(11) 0.0005(11) 
C8 0.0245(18) 0.0269(16) 0.0237(15) 0.0000(13) -0.0004(13) -0.0082(13) 
C9 0.0232(18) 0.0261(16) 0.0361(18) -0.0011(14) 0.0033(14) -0.0083(13) 
C10 0.0292(19) 0.0195(14) 0.0275(17) 0.0034(13) 0.0123(14) -0.0029(13) 
C11 0.060(3) 0.0282(17) 0.0141(15) 0.0039(13) 0.0024(15) -0.0076(16) 
C12 0.049(2) 0.0240(15) 0.0182(15) -0.0013(12) -0.0033(14) -0.0087(15) 
C13 0.0208(16) 0.0152(12) 0.0125(13) 0.0003(10) 0.0044(11) -0.0067(11) 
C14 0.0254(17) 0.0223(14) 0.0186(14) -0.0027(12) 0.0011(12) -0.0064(12) 
C15 0.037(2) 0.0270(15) 0.0168(14) -0.0052(12) -0.0022(13) -0.0087(14) 
C16 0.047(2) 0.0233(15) 0.0185(15) -0.0085(12) 0.0072(14) -0.0067(14) 
C17 0.0305(19) 0.0200(14) 0.0233(15) -0.0044(12) 0.0081(13) 0.0001(13) 
C18 0.0256(17) 0.0179(13) 0.0160(14) -0.0006(11) 0.0013(12) -0.0017(12) 
C19 0.0181(16) 0.0223(14) 0.0217(15) -0.0088(12) 0.0033(12) -0.0038(12) 
C20 0.0289(19) 0.0266(16) 0.0264(16) -0.0046(13) 0.0086(14) -0.0019(14) 
C21 0.036(2) 0.0395(19) 0.0302(18) -0.0100(15) 0.0128(15) -0.0054(16) 
C22 0.029(2) 0.044(2) 0.041(2) -0.0225(17) 0.0054(16) 0.0027(16) 
C23 0.032(2) 0.0356(18) 0.0391(19) -0.0180(16) -0.0081(16) 0.0096(15) 
C24 0.0269(18) 0.0283(16) 0.0251(16) -0.0111(13) -0.0035(13) 0.0031(13) 
C25 0.0162(15) 0.0200(13) 0.0178(14) -0.0035(11) -0.0022(11) -0.0014(11) 
C26 0.0181(16) 0.0240(14) 0.0229(15) -0.0069(12) 0.0002(12) -0.0032(12) 
C27 0.0209(17) 0.0322(16) 0.0187(15) -0.0060(13) 0.0024(12) -0.0050(13) 
C28 0.0234(17) 0.0277(15) 0.0215(15) 0.0011(12) -0.0010(12) -0.0071(13) 
C29 0.0317(19) 0.0193(14) 0.0251(16) -0.0015(12) -0.0066(13) -0.0048(13) 
C30 0.0287(18) 0.0237(15) 0.0191(14) -0.0055(12) -0.0053(13) -0.0018(13) 
C31 0.0194(16) 0.0222(14) 0.0116(13) -0.0026(11) 0.0043(11) -0.0041(12) 
C32 0.0257(17) 0.0254(15) 0.0127(13) -0.0022(11) 0.0027(12) -0.0086(12) 
C33 0.0267(18) 0.0386(18) 0.0116(13) -0.0008(12) 0.0022(12) -0.0130(14) 
C34 0.0206(17) 0.0443(19) 0.0144(14) 0.0049(13) -0.0005(12) -0.0037(14) 
C35 0.0246(18) 0.0303(16) 0.0246(16) -0.0008(13) -0.0001(13) 0.0057(14) 
C36 0.0243(17) 0.0266(15) 0.0179(14) -0.0050(12) -0.0001(12) -0.0014(13) 
 
_geom_special_details 
; 
 All esds (except the esd in the dihedral angle between two l.s. planes) 
 are estimated using the full covariance matrix.  The cell esds are taken 
 into account individually in the estimation of esds in distances, angles 
 and torsion angles; correlations between esds in cell parameters are only 
 used when they are defined by crystal symmetry.  An approximate (isotropic) 
 treatment of cell esds is used for estimating esds involving l.s. planes. 
; 
 
loop_ 
 _geom_bond_atom_site_label_1 
 _geom_bond_atom_site_label_2 
 _geom_bond_distance 
 _geom_bond_site_symmetry_2 
 _geom_bond_publ_flag 
Fe1 N2 1.703(3) . ? 
Fe1 N3 1.704(3) . ? 
Fe1 O3 2.045(2) . ? 
Fe1 O5 2.048(2) . ? 
P1 N1 1.582(3) . ? 
P1 C1 1.793(3) . ? 
P1 C7 1.799(3) . ? 
P1 C13 1.805(3) . ? 
P2 N1 1.589(2) . ? 
P2 C31 1.796(3) . ? 
P2 C19 1.803(3) . ? 
P2 C25 1.807(3) . ? 
N2 O1 1.174(4) . ? 
N3 O2 1.174(4) . ? 
N4 O7 1.210(4) . ? 
N4 O4 1.226(4) . ? 
N4 O3 1.289(3) . ? 
N5 O6 1.230(4) . ? 
N5 O5 1.262(4) . ? 
C1 C6 1.398(4) . ? 
C1 C2 1.401(4) . ? 
C2 C3 1.381(4) . ? 
C2 H2 0.9500 . ? 
C3 C4 1.388(4) . ? 
C3 H3 0.9500 . ? 
C4 C5 1.386(4) . ? 
C4 H4 0.9500 . ? 
C5 C6 1.382(4) . ? 
C5 H5 0.9500 . ? 
C6 H6 0.9500 . ? 
C7 C8 1.390(4) . ? 
C7 C12 1.393(4) . ? 
C8 C9 1.387(4) . ? 
C8 H8 0.9500 . ? 
C9 C10 1.371(5) . ? 
C9 H9 0.9500 . ? 
C10 C11 1.367(5) . ? 
C10 H10 0.9500 . ? 
C11 C12 1.389(4) . ? 
C11 H11 0.9500 . ? 
C12 H12 0.9500 . ? 
C13 C14 1.389(4) . ? 
C13 C18 1.397(4) . ? 
C14 C15 1.391(4) . ? 
C14 H14 0.9500 . ? 
C15 C16 1.386(5) . ? 
C15 H15 0.9500 . ? 
C16 C17 1.388(5) . ? 
C16 H16 0.9500 . ? 
C17 C18 1.392(4) . ? 
C17 H17 0.9500 . ? 
C18 H18 0.9500 . ? 
C19 C24 1.388(4) . ? 
C19 C20 1.405(4) . ? 
C20 C21 1.390(5) . ? 
C20 H20 0.9500 . ? 
C21 C22 1.374(5) . ? 
C21 H21 0.9500 . ? 
C22 C23 1.388(5) . ? 
C22 H22 0.9500 . ? 
C23 C24 1.385(5) . ? 
C23 H23 0.9500 . ? 
C24 H24 0.9500 . ? 
C25 C26 1.393(4) . ? 
C25 C30 1.395(4) . ? 
C26 C27 1.393(4) . ? 
C26 H26 0.9500 . ? 
C27 C28 1.385(4) . ? 
C27 H27 0.9500 . ? 
C28 C29 1.388(4) . ? 
C28 H28 0.9500 . ? 
C29 C30 1.394(4) . ? 
C29 H29 0.9500 . ? 
C30 H30 0.9500 . ? 
C31 C36 1.395(4) . ? 
C31 C32 1.404(4) . ? 
C32 C33 1.381(4) . ? 
C32 H32 0.9500 . ? 
C33 C34 1.387(5) . ? 
C33 H33 0.9500 . ? 
C34 C35 1.380(5) . ? 
C34 H34 0.9500 . ? 
C35 C36 1.389(4) . ? 
C35 H35 0.9500 . ? 
C36 H36 0.9500 . ? 
 
loop_ 
 _geom_angle_atom_site_label_1 
 _geom_angle_atom_site_label_2 
 _geom_angle_atom_site_label_3 
 _geom_angle 
 _geom_angle_site_symmetry_1 
 _geom_angle_site_symmetry_3 
 _geom_angle_publ_flag 
N2 Fe1 N3 110.15(14) . . ? 
N2 Fe1 O3 108.32(12) . . ? 
N3 Fe1 O3 101.72(12) . . ? 
N2 Fe1 O5 97.75(11) . . ? 
N3 Fe1 O5 103.43(11) . . ? 
O3 Fe1 O5 134.42(10) . . ? 
N1 P1 C1 113.64(13) . . ? 
N1 P1 C7 110.77(13) . . ? 
C1 P1 C7 108.38(13) . . ? 
N1 P1 C13 109.60(13) . . ? 
C1 P1 C13 108.43(13) . . ? 
C7 P1 C13 105.68(12) . . ? 
N1 P2 C31 106.93(13) . . ? 
N1 P2 C19 115.13(13) . . ? 
C31 P2 C19 107.17(13) . . ? 
N1 P2 C25 111.98(13) . . ? 
C31 P2 C25 107.57(13) . . ? 
C19 P2 C25 107.71(13) . . ? 
P1 N1 P2 138.42(16) . . ? 
O1 N2 Fe1 162.2(3) . . ? 
O2 N3 Fe1 160.3(3) . . ? 
O7 N4 O4 126.1(3) . . ? 
O7 N4 O3 117.1(3) . . ? 
O4 N4 O3 116.7(3) . . ? 
O6 N5 O5 114.5(3) . . ? 
N4 O3 Fe1 107.99(18) . . ? 
N5 O5 Fe1 107.80(19) . . ? 
C6 C1 C2 119.2(3) . . ? 
C6 C1 P1 122.2(2) . . ? 
C2 C1 P1 118.2(2) . . ? 
C3 C2 C1 120.4(3) . . ? 
C3 C2 H2 119.8 . . ? 
C1 C2 H2 119.8 . . ? 
C2 C3 C4 120.1(3) . . ? 
C2 C3 H3 119.9 . . ? 
C4 C3 H3 119.9 . . ? 
C5 C4 C3 119.7(3) . . ? 
C5 C4 H4 120.2 . . ? 
C3 C4 H4 120.2 . . ? 
C6 C5 C4 120.9(3) . . ? 
C6 C5 H5 119.6 . . ? 
C4 C5 H5 119.6 . . ? 
C5 C6 C1 119.7(3) . . ? 
C5 C6 H6 120.1 . . ? 
C1 C6 H6 120.1 . . ? 
C8 C7 C12 119.2(3) . . ? 
C8 C7 P1 121.1(2) . . ? 
C12 C7 P1 119.7(2) . . ? 
C9 C8 C7 120.3(3) . . ? 
C9 C8 H8 119.8 . . ? 
C7 C8 H8 119.8 . . ? 
C10 C9 C8 120.0(3) . . ? 
C10 C9 H9 120.0 . . ? 
C8 C9 H9 120.0 . . ? 
C11 C10 C9 120.3(3) . . ? 
C11 C10 H10 119.9 . . ? 
C9 C10 H10 119.9 . . ? 
C10 C11 C12 120.8(3) . . ? 
C10 C11 H11 119.6 . . ? 
C12 C11 H11 119.6 . . ? 
C11 C12 C7 119.4(3) . . ? 
C11 C12 H12 120.3 . . ? 
C7 C12 H12 120.3 . . ? 
C14 C13 C18 119.9(3) . . ? 
C14 C13 P1 121.0(2) . . ? 
C18 C13 P1 118.9(2) . . ? 
C13 C14 C15 120.1(3) . . ? 
C13 C14 H14 120.0 . . ? 
C15 C14 H14 120.0 . . ? 
C16 C15 C14 119.8(3) . . ? 
C16 C15 H15 120.1 . . ? 
C14 C15 H15 120.1 . . ? 
C15 C16 C17 120.5(3) . . ? 
C15 C16 H16 119.8 . . ? 
C17 C16 H16 119.8 . . ? 
C16 C17 C18 119.9(3) . . ? 
C16 C17 H17 120.1 . . ? 
C18 C17 H17 120.1 . . ? 
C17 C18 C13 119.8(3) . . ? 
C17 C18 H18 120.1 . . ? 
C13 C18 H18 120.1 . . ? 
C24 C19 C20 119.4(3) . . ? 
C24 C19 P2 121.8(2) . . ? 
C20 C19 P2 118.6(2) . . ? 
C21 C20 C19 119.8(3) . . ? 
C21 C20 H20 120.1 . . ? 
C19 C20 H20 120.1 . . ? 
C22 C21 C20 120.2(3) . . ? 
C22 C21 H21 119.9 . . ? 
C20 C21 H21 119.9 . . ? 
C21 C22 C23 120.4(3) . . ? 
C21 C22 H22 119.8 . . ? 
C23 C22 H22 119.8 . . ? 
C24 C23 C22 119.9(3) . . ? 
C24 C23 H23 120.0 . . ? 
C22 C23 H23 120.0 . . ? 
C23 C24 C19 120.3(3) . . ? 
C23 C24 H24 119.8 . . ? 
C19 C24 H24 119.8 . . ? 
C26 C25 C30 119.4(3) . . ? 
C26 C25 P2 119.8(2) . . ? 
C30 C25 P2 120.7(2) . . ? 
C27 C26 C25 120.2(3) . . ? 
C27 C26 H26 119.9 . . ? 
C25 C26 H26 119.9 . . ? 
C28 C27 C26 120.0(3) . . ? 
C28 C27 H27 120.0 . . ? 
C26 C27 H27 120.0 . . ? 
C27 C28 C29 120.3(3) . . ? 
C27 C28 H28 119.9 . . ? 
C29 C28 H28 119.9 . . ? 
C28 C29 C30 119.8(3) . . ? 
C28 C29 H29 120.1 . . ? 
C30 C29 H29 120.1 . . ? 
C29 C30 C25 120.2(3) . . ? 
C29 C30 H30 119.9 . . ? 
C25 C30 H30 119.9 . . ? 
C36 C31 C32 119.5(3) . . ? 
C36 C31 P2 119.4(2) . . ? 
C32 C31 P2 120.9(2) . . ? 
C33 C32 C31 120.1(3) . . ? 
C33 C32 H32 120.0 . . ? 
C31 C32 H32 120.0 . . ? 
C32 C33 C34 119.8(3) . . ? 
C32 C33 H33 120.1 . . ? 
C34 C33 H33 120.1 . . ? 
C35 C34 C33 120.6(3) . . ? 
C35 C34 H34 119.7 . . ? 
C33 C34 H34 119.7 . . ? 
C34 C35 C36 120.2(3) . . ? 
C34 C35 H35 119.9 . . ? 
C36 C35 H35 119.9 . . ? 
C35 C36 C31 119.7(3) . . ? 
C35 C36 H36 120.1 . . ? 
C31 C36 H36 120.1 . . ? 
 
_diffrn_measured_fraction_theta_max    0.968 
_diffrn_reflns_theta_full              26.41 
_diffrn_measured_fraction_theta_full   0.968 
_refine_diff_density_max    1.096 
_refine_diff_density_min   -0.772 
_refine_diff_density_rms    0.086 

complex 4   ===END

 complex 5

data_111148lt_0m 
 
_audit_creation_method            SHELXL-97 
_chemical_name_systematic 
; 
 ? 
; 
_chemical_name_common             ? 
_chemical_melting_point           ? 
_chemical_formula_moiety          ? 
_chemical_formula_sum 
 'C72 H60 Fe N7 O11 P4' 
_chemical_formula_weight          1379.00 
 
loop_ 
 _atom_type_symbol 
 _atom_type_description 
 _atom_type_scat_dispersion_real 
 _atom_type_scat_dispersion_imag 
 _atom_type_scat_source 
 'C'  'C'   0.0033   0.0016 
 'International Tables Vol C Tables 4.2.6.8 and 6.1.1.4' 
 'H'  'H'   0.0000   0.0000 
 'International Tables Vol C Tables 4.2.6.8 and 6.1.1.4' 
 'N'  'N'   0.0061   0.0033 
 'International Tables Vol C Tables 4.2.6.8 and 6.1.1.4' 
 'O'  'O'   0.0106   0.0060 
 'International Tables Vol C Tables 4.2.6.8 and 6.1.1.4' 
 'P'  'P'   0.1023   0.0942 
 'International Tables Vol C Tables 4.2.6.8 and 6.1.1.4' 
 'Fe'  'Fe'   0.3463   0.8444 
 'International Tables Vol C Tables 4.2.6.8 and 6.1.1.4' 
 
_symmetry_cell_setting            orthorhombic
_symmetry_space_group_name_H-M   'P 21 21 21'
_symmetry_space_group_name_hall  'P 2ac 2ab' 
 
loop_ 
 _symmetry_equiv_pos_as_xyz 
 'x, y, z' 
 '-x+1/2, -y, z+1/2' 
 '-x, y+1/2, -z+1/2' 
 'x+1/2, -y+1/2, -z' 
 
_cell_length_a                    17.1087(14) 
_cell_length_b                    19.2498(18) 
_cell_length_c                    19.8943(18) 
_cell_angle_alpha                 90.00 
_cell_angle_beta                  90.00 
_cell_angle_gamma                 90.00 
_cell_volume                      6552.0(10) 
_cell_formula_units_Z             4 
_cell_measurement_temperature     100(2) 
_cell_measurement_reflns_used     7444
_cell_measurement_theta_min       2.7996
_cell_measurement_theta_max       24.3511 
 
_exptl_crystal_description        Tabullar
_exptl_crystal_colour             Brown
_exptl_crystal_size_max           0.22 
_exptl_crystal_size_mid           0.17
_exptl_crystal_size_min           0.10
_exptl_crystal_density_meas       'not measured' 
_exptl_crystal_density_diffrn     1.398 
_exptl_crystal_density_method     'not measured' 
_exptl_crystal_F_000              2860 
_exptl_absorpt_coefficient_mu     0.396 
_exptl_absorpt_correction_type    multi-scan 
_exptl_absorpt_correction_T_min   0.8852  
_exptl_absorpt_correction_T_max   0.9486 
_exptl_absorpt_process_details    'SADABS V2008/1 (Bruker AXS)' 
 
_exptl_special_details 
; 
 ? 
; 
 
_diffrn_ambient_temperature       100(2) 
_diffrn_radiation_wavelength      0.71073 
_diffrn_radiation_type            MoK\a 
_diffrn_radiation_source          'fine-focus sealed tube' 
_diffrn_radiation_monochromator   graphite 
_diffrn_measurement_device_type   'Bruker APEX-II CCD'
_diffrn_measurement_method        '\f and \w scans'
_diffrn_detector_area_resol_mean  8.3333 
_diffrn_reflns_number             52333 
_diffrn_reflns_av_R_equivalents   0.0542 
_diffrn_reflns_av_sigmaI/netI     0.0633 
_diffrn_reflns_limit_h_min        -18 
_diffrn_reflns_limit_h_max        21 
_diffrn_reflns_limit_k_min        -24 
_diffrn_reflns_limit_k_max        16 
_diffrn_reflns_limit_l_min        -24 
_diffrn_reflns_limit_l_max        22 
_diffrn_reflns_theta_min          1.47 
_diffrn_reflns_theta_max          26.41 
_reflns_number_total              13413 
_reflns_number_gt                 11187 
_reflns_threshold_expression      >2sigma(I) 
 
_computing_data_collection        'APEX2 (Bruker AXS, 2010)'
_computing_cell_refinement        'SAINT V7.34A (Bruker AXS, 2006)'
_computing_data_reduction         'SAINT V7.34A (Bruker AXS, 2006)'
_computing_structure_solution     'SHELXS-97 (Sheldrick, 2008)'
_computing_structure_refinement   'SHELXL-97 (Sheldrick, 2008)'
_computing_molecular_graphics     'SHELXTL (Sheldrick, 2008)'
_computing_publication_material   'SHELXTL'
 
_refine_special_details 
; 
 Refinement of F^2^ against ALL reflections.  The weighted R-factor wR and 
 goodness of fit S are based on F^2^, conventional R-factors R are based 
 on F, with F set to zero for negative F^2^. The threshold expression of 
 F^2^ > 2sigma(F^2^) is used only for calculating R-factors(gt) etc. and is 
 not relevant to the choice of reflections for refinement.  R-factors based 
 on F^2^ are statistically about twice as large as those based on F, and R- 
 factors based on ALL data will be even larger. 
; 
 
_refine_ls_structure_factor_coef  Fsqd  
_refine_ls_matrix_type            full 
_refine_ls_weighting_scheme       calc  
_refine_ls_weighting_details 
 'calc w=1/[\s^2^(Fo^2^)+(0.0932P)^2^+0.0598P] where P=(Fo^2^+2Fc^2^)/3' 
_atom_sites_solution_primary      direct 
_atom_sites_solution_secondary    difmap 
_atom_sites_solution_hydrogens    geom 
_refine_ls_hydrogen_treatment     constr
_refine_ls_extinction_method      SHELXL 
_refine_ls_extinction_coef        0.0090(5) 
_refine_ls_extinction_expression 
 'Fc^*^=kFc[1+0.001xFc^2^\l^3^/sin(2\q)]^-1/4^' 
_refine_ls_abs_structure_details 
 'Flack H D (1983), Acta Cryst. A39, 876-881' 
_refine_ls_abs_structure_Flack    0.49(2) 
_refine_ls_number_reflns          13413 
_refine_ls_number_parameters      857 
_refine_ls_number_restraints      0 
_refine_ls_R_factor_all           0.0716 
_refine_ls_R_factor_gt            0.0532 
_refine_ls_wR_factor_ref          0.1610 
_refine_ls_wR_factor_gt           0.1235 
_refine_ls_goodness_of_fit_ref    1.140 
_refine_ls_restrained_S_all       1.140 
_refine_ls_shift/su_max           0.001 
_refine_ls_shift/su_mean          0.000 
 
loop_ 
 _atom_site_label 
 _atom_site_type_symbol 
 _atom_site_fract_x 
 _atom_site_fract_y 
 _atom_site_fract_z 
 _atom_site_U_iso_or_equiv 
 _atom_site_adp_type 
 _atom_site_occupancy 
 _atom_site_symmetry_multiplicity 
 _atom_site_calc_flag 
 _atom_site_refinement_flags 
 _atom_site_disorder_assembly 
 _atom_site_disorder_group 
Fe1 Fe 0.74319(3) 0.75248(3) 0.25239(3) 0.02004(16) Uani 1 1 d . . . 
P1 P 0.28874(6) 0.62395(5) 0.13845(5) 0.0147(2) Uani 1 1 d . . . 
P2 P 0.35624(6) 0.49941(5) 0.07117(5) 0.0160(2) Uani 1 1 d . . . 
P3 P 0.76689(6) 0.37959(5) 0.15579(5) 0.0147(2) Uani 1 1 d . . . 
P4 P 0.83829(6) 0.49830(5) 0.08074(5) 0.0154(2) Uani 1 1 d . . . 
N1 N 0.3054(2) 0.56651(17) 0.08401(17) 0.0198(8) Uani 1 1 d . . . 
N2 N 0.7827(2) 0.43615(17) 0.10024(16) 0.0194(8) Uani 1 1 d . . . 
N3 N 0.8254(2) 0.73333(19) 0.20598(19) 0.0278(9) Uani 1 1 d . . . 
N4 N 0.7748(2) 0.82763(19) 0.29165(18) 0.0250(8) Uani 1 1 d . . . 
N5 N 0.6966(2) 0.84274(18) 0.13320(17) 0.0207(8) Uani 1 1 d . . . 
N6 N 0.8134(2) 0.67285(18) 0.37087(18) 0.0208(8) Uani 1 1 d . . . 
N7 N 0.6101(2) 0.6786(2) 0.25459(18) 0.0261(8) Uani 1 1 d . . . 
O1 O 0.88898(19) 0.7487(2) 0.18972(18) 0.0398(9) Uani 1 1 d . . . 
O2 O 0.8245(2) 0.86860(18) 0.29965(17) 0.0370(8) Uani 1 1 d . . . 
O3 O 0.67146(17) 0.80098(15) 0.17831(14) 0.0244(7) Uani 1 1 d . . . 
O4 O 0.76703(19) 0.85230(16) 0.12606(17) 0.0314(8) Uani 1 1 d . . . 
O5 O 0.64646(19) 0.87277(17) 0.09777(14) 0.0301(7) Uani 1 1 d . . . 
O6 O 0.75136(17) 0.68237(16) 0.33568(15) 0.0281(7) Uani 1 1 d . . . 
O7 O 0.8098(2) 0.63498(17) 0.42074(16) 0.0332(8) Uani 1 1 d . . . 
O8 O 0.87456(19) 0.70223(19) 0.35333(19) 0.0413(9) Uani 1 1 d . . . 
O9 O 0.62110(18) 0.73430(15) 0.28777(15) 0.0249(7) Uani 1 1 d . . . 
O10 O 0.66638(19) 0.65759(17) 0.21826(15) 0.0306(8) Uani 1 1 d . . . 
O11 O 0.54681(19) 0.64740(17) 0.25860(17) 0.0336(8) Uani 1 1 d . . . 
C1 C 0.2912(2) 0.5920(2) 0.2240(2) 0.0179(9) Uani 1 1 d . . . 
C2 C 0.3319(3) 0.6248(2) 0.2758(2) 0.0240(9) Uani 1 1 d . . . 
H2 H 0.3621 0.6651 0.2669 0.029 Uiso 1 1 calc R . . 
C3 C 0.3279(3) 0.5979(3) 0.3405(2) 0.0312(11) Uani 1 1 d . . . 
H3 H 0.3552 0.6200 0.3761 0.037 Uiso 1 1 calc R . . 
C4 C 0.2842(3) 0.5391(3) 0.3530(2) 0.0318(12) Uani 1 1 d . . . 
H4 H 0.2816 0.5211 0.3974 0.038 Uiso 1 1 calc R . . 
C5 C 0.2438(3) 0.5057(2) 0.3015(2) 0.0299(10) Uani 1 1 d . . . 
H5 H 0.2140 0.4651 0.3105 0.036 Uiso 1 1 calc R . . 
C6 C 0.2476(2) 0.5322(2) 0.2376(2) 0.0216(9) Uani 1 1 d . . . 
H6 H 0.2204 0.5097 0.2022 0.026 Uiso 1 1 calc R . . 
C7 C 0.1912(2) 0.6550(2) 0.1244(2) 0.0166(8) Uani 1 1 d . . . 
C8 C 0.1490(2) 0.6883(2) 0.1765(2) 0.0186(9) Uani 1 1 d . . . 
H8 H 0.1716 0.6934 0.2198 0.022 Uiso 1 1 calc R . . 
C9 C 0.0743(3) 0.7133(2) 0.1635(2) 0.0235(10) Uani 1 1 d . . . 
H9 H 0.0457 0.7353 0.1985 0.028 Uiso 1 1 calc R . . 
C10 C 0.0410(3) 0.7066(2) 0.1005(2) 0.0242(10) Uani 1 1 d . . . 
H10 H -0.0099 0.7243 0.0921 0.029 Uiso 1 1 calc R . . 
C11 C 0.0825(2) 0.6737(2) 0.0495(2) 0.0214(9) Uani 1 1 d . . . 
H11 H 0.0595 0.6686 0.0063 0.026 Uiso 1 1 calc R . . 
C12 C 0.1577(2) 0.6479(2) 0.06109(19) 0.0156(8) Uani 1 1 d . . . 
H12 H 0.1858 0.6256 0.0260 0.019 Uiso 1 1 calc R . . 
C13 C 0.3541(2) 0.6969(2) 0.1322(2) 0.0174(9) Uani 1 1 d . . . 
C14 C 0.3271(2) 0.7630(2) 0.11445(19) 0.0192(9) Uani 1 1 d . . . 
H14 H 0.2729 0.7705 0.1074 0.023 Uiso 1 1 calc R . . 
C15 C 0.3794(3) 0.8180(2) 0.1071(2) 0.0234(10) Uani 1 1 d . . . 
H15 H 0.3607 0.8628 0.0952 0.028 Uiso 1 1 calc R . . 
C16 C 0.4582(3) 0.8074(2) 0.1171(2) 0.0220(10) Uani 1 1 d . . . 
H16 H 0.4939 0.8448 0.1118 0.026 Uiso 1 1 calc R . . 
C17 C 0.4854(3) 0.7417(2) 0.1349(2) 0.0249(10) Uani 1 1 d . . . 
H17 H 0.5397 0.7346 0.1423 0.030 Uiso 1 1 calc R . . 
C18 C 0.4342(2) 0.6870(2) 0.1419(2) 0.0228(10) Uani 1 1 d . . . 
H18 H 0.4535 0.6422 0.1533 0.027 Uiso 1 1 calc R . . 
C19 C 0.4210(2) 0.4748(2) 0.1379(2) 0.0198(9) Uani 1 1 d . . . 
C20 C 0.4940(2) 0.5071(2) 0.1430(2) 0.0222(9) Uani 1 1 d . . . 
H20 H 0.5112 0.5375 0.1085 0.027 Uiso 1 1 calc R . . 
C21 C 0.5407(3) 0.4949(2) 0.1976(2) 0.0265(10) Uani 1 1 d . . . 
H21 H 0.5898 0.5177 0.2012 0.032 Uiso 1 1 calc R . . 
C22 C 0.5171(3) 0.4500(2) 0.2471(2) 0.0281(10) Uani 1 1 d . . . 
H22 H 0.5503 0.4415 0.2845 0.034 Uiso 1 1 calc R . . 
C23 C 0.4458(3) 0.4169(2) 0.2433(2) 0.0271(10) Uani 1 1 d . . . 
H23 H 0.4300 0.3859 0.2779 0.033 Uiso 1 1 calc R . . 
C24 C 0.3971(3) 0.4291(2) 0.1888(2) 0.0211(9) Uani 1 1 d . . . 
H24 H 0.3478 0.4067 0.1860 0.025 Uiso 1 1 calc R . . 
C25 C 0.2911(2) 0.4274(2) 0.0550(2) 0.0185(9) Uani 1 1 d . . . 
C26 C 0.3181(3) 0.3594(2) 0.0527(2) 0.0264(10) Uani 1 1 d . . . 
H26 H 0.3719 0.3500 0.0604 0.032 Uiso 1 1 calc R . . 
C27 C 0.2673(3) 0.3051(2) 0.0393(2) 0.0337(12) Uani 1 1 d . . . 
H27 H 0.2862 0.2587 0.0379 0.040 Uiso 1 1 calc R . . 
C28 C 0.1892(3) 0.3184(3) 0.0279(2) 0.0364(13) Uani 1 1 d . . . 
H28 H 0.1543 0.2812 0.0191 0.044 Uiso 1 1 calc R . . 
C29 C 0.1623(3) 0.3850(3) 0.0293(2) 0.0354(12) Uani 1 1 d . . . 
H29 H 0.1085 0.3938 0.0210 0.042 Uiso 1 1 calc R . . 
C30 C 0.2124(3) 0.4404(2) 0.0427(2) 0.0256(10) Uani 1 1 d . . . 
H30 H 0.1930 0.4867 0.0435 0.031 Uiso 1 1 calc R . . 
C31 C 0.4158(2) 0.5134(2) -0.00231(19) 0.0179(9) Uani 1 1 d . . . 
C32 C 0.3978(3) 0.5685(2) -0.0450(2) 0.0257(10) Uani 1 1 d . . . 
H32 H 0.3551 0.5983 -0.0350 0.031 Uiso 1 1 calc R . . 
C33 C 0.4422(3) 0.5798(3) -0.1022(2) 0.0319(11) Uani 1 1 d . . . 
H33 H 0.4296 0.6168 -0.1318 0.038 Uiso 1 1 calc R . . 
C34 C 0.5042(3) 0.5374(3) -0.1159(2) 0.0344(12) Uani 1 1 d . . . 
H34 H 0.5351 0.5460 -0.1547 0.041 Uiso 1 1 calc R . . 
C35 C 0.5232(3) 0.4816(3) -0.0740(2) 0.0319(11) Uani 1 1 d . . . 
H35 H 0.5661 0.4522 -0.0846 0.038 Uiso 1 1 calc R . . 
C36 C 0.4786(3) 0.4697(2) -0.0166(2) 0.0252(10) Uani 1 1 d . . . 
H36 H 0.4908 0.4321 0.0125 0.030 Uiso 1 1 calc R . . 
C37 C 0.7707(2) 0.4142(2) 0.23904(19) 0.0167(8) Uani 1 1 d . . . 
C38 C 0.7416(2) 0.4811(2) 0.2496(2) 0.0211(9) Uani 1 1 d . . . 
H38 H 0.7225 0.5073 0.2127 0.025 Uiso 1 1 calc R . . 
C39 C 0.7405(3) 0.5096(2) 0.3139(2) 0.0250(10) Uani 1 1 d . . . 
H39 H 0.7197 0.5547 0.3210 0.030 Uiso 1 1 calc R . . 
C40 C 0.7702(3) 0.4716(2) 0.3675(2) 0.0272(10) Uani 1 1 d . . . 
H40 H 0.7702 0.4912 0.4114 0.033 Uiso 1 1 calc R . . 
C41 C 0.7995(3) 0.4060(2) 0.3575(2) 0.0282(11) Uani 1 1 d . . . 
H41 H 0.8195 0.3803 0.3944 0.034 Uiso 1 1 calc R . . 
C42 C 0.8000(3) 0.3765(2) 0.2925(2) 0.0236(10) Uani 1 1 d . . . 
H42 H 0.8204 0.3312 0.2856 0.028 Uiso 1 1 calc R . . 
C43 C 0.6715(2) 0.34407(19) 0.14055(19) 0.0142(8) Uani 1 1 d . . . 
C44 C 0.6291(3) 0.3136(2) 0.1915(2) 0.0214(9) Uani 1 1 d . . . 
H44 H 0.6489 0.3140 0.2361 0.026 Uiso 1 1 calc R . . 
C45 C 0.5585(2) 0.2827(2) 0.1782(2) 0.0233(10) Uani 1 1 d . . . 
H45 H 0.5295 0.2619 0.2136 0.028 Uiso 1 1 calc R . . 
C46 C 0.5300(3) 0.2819(2) 0.1143(2) 0.0232(10) Uani 1 1 d . . . 
H46 H 0.4812 0.2603 0.1052 0.028 Uiso 1 1 calc R . . 
C47 C 0.5714(2) 0.3120(2) 0.0632(2) 0.0221(9) Uani 1 1 d . . . 
H47 H 0.5512 0.3112 0.0187 0.027 Uiso 1 1 calc R . . 
C48 C 0.6421(2) 0.3435(2) 0.0760(2) 0.0174(9) Uani 1 1 d . . . 
H48 H 0.6706 0.3648 0.0406 0.021 Uiso 1 1 calc R . . 
C49 C 0.8340(2) 0.3078(2) 0.15135(19) 0.0168(9) Uani 1 1 d . . . 
C50 C 0.8107(3) 0.2426(2) 0.1297(2) 0.0213(9) Uani 1 1 d . . . 
H50 H 0.7572 0.2336 0.1206 0.026 Uiso 1 1 calc R . . 
C51 C 0.8662(3) 0.1904(2) 0.1213(2) 0.0244(10) Uani 1 1 d . . . 
H51 H 0.8504 0.1455 0.1070 0.029 Uiso 1 1 calc R . . 
C52 C 0.9444(3) 0.2038(2) 0.1337(2) 0.0270(10) Uani 1 1 d . . . 
H52 H 0.9821 0.1685 0.1263 0.032 Uiso 1 1 calc R . . 
C53 C 0.9682(3) 0.2687(2) 0.1571(2) 0.0296(11) Uani 1 1 d . . . 
H53 H 1.0217 0.2775 0.1667 0.035 Uiso 1 1 calc R . . 
C54 C 0.9131(3) 0.3200(2) 0.1660(2) 0.0251(10) Uani 1 1 d . . . 
H54 H 0.9287 0.3642 0.1823 0.030 Uiso 1 1 calc R . . 
C55 C 0.8921(2) 0.4765(2) 0.00588(19) 0.0168(9) Uani 1 1 d . . . 
C56 C 0.8714(3) 0.4176(2) -0.0298(2) 0.0202(9) Uani 1 1 d . . . 
H56 H 0.8288 0.3898 -0.0153 0.024 Uiso 1 1 calc R . . 
C57 C 0.9134(3) 0.3993(2) -0.0871(2) 0.0247(10) Uani 1 1 d . . . 
H57 H 0.8999 0.3587 -0.1117 0.030 Uiso 1 1 calc R . . 
C58 C 0.9748(3) 0.4407(2) -0.1081(2) 0.0261(10) Uani 1 1 d . . . 
H58 H 1.0031 0.4283 -0.1474 0.031 Uiso 1 1 calc R . . 
C59 C 0.9957(3) 0.4993(2) -0.0730(2) 0.0249(10) Uani 1 1 d . . . 
H59 H 1.0384 0.5269 -0.0877 0.030 Uiso 1 1 calc R . . 
C60 C 0.9542(3) 0.5179(2) -0.0160(2) 0.0219(9) Uani 1 1 d . . . 
H60 H 0.9679 0.5586 0.0081 0.026 Uiso 1 1 calc R . . 
C61 C 0.9109(2) 0.5227(2) 0.1425(2) 0.0185(9) Uani 1 1 d . . . 
C62 C 0.9831(2) 0.4904(2) 0.1421(2) 0.0240(10) Uani 1 1 d . . . 
H62 H 0.9949 0.4580 0.1076 0.029 Uiso 1 1 calc R . . 
C63 C 1.0385(3) 0.5046(3) 0.1910(2) 0.0300(11) Uani 1 1 d . . . 
H63 H 1.0874 0.4812 0.1913 0.036 Uiso 1 1 calc R . . 
C64 C 1.0206(3) 0.5541(3) 0.2399(2) 0.0319(11) Uani 1 1 d . . . 
H64 H 1.0584 0.5655 0.2731 0.038 Uiso 1 1 calc R . . 
C65 C 0.9489(3) 0.5866(2) 0.2408(2) 0.0276(10) Uani 1 1 d . . . 
H65 H 0.9376 0.6198 0.2747 0.033 Uiso 1 1 calc R . . 
C66 C 0.8931(3) 0.5712(2) 0.1924(2) 0.0226(10) Uani 1 1 d . . . 
H66 H 0.8435 0.5934 0.1932 0.027 Uiso 1 1 calc R . . 
C67 C 0.7775(2) 0.5727(2) 0.06453(19) 0.0176(9) Uani 1 1 d . . . 
C68 C 0.8094(3) 0.6394(2) 0.0601(2) 0.0220(10) Uani 1 1 d . . . 
H68 H 0.8641 0.6461 0.0655 0.026 Uiso 1 1 calc R . . 
C69 C 0.7613(3) 0.6958(2) 0.0479(2) 0.0292(11) Uani 1 1 d . . . 
H69 H 0.7826 0.7412 0.0454 0.035 Uiso 1 1 calc R . . 
C70 C 0.6823(3) 0.6855(3) 0.0394(2) 0.0340(12) Uani 1 1 d . . . 
H70 H 0.6493 0.7243 0.0311 0.041 Uiso 1 1 calc R . . 
C71 C 0.6501(3) 0.6193(3) 0.0427(2) 0.0314(11) Uani 1 1 d . . . 
H71 H 0.5957 0.6128 0.0360 0.038 Uiso 1 1 calc R . . 
C72 C 0.6975(3) 0.5633(2) 0.0557(2) 0.0238(10) Uani 1 1 d . . . 
H72 H 0.6757 0.5180 0.0588 0.029 Uiso 1 1 calc R . . 
 
loop_ 
 _atom_site_aniso_label 
 _atom_site_aniso_U_11 
 _atom_site_aniso_U_22 
 _atom_site_aniso_U_33 
 _atom_site_aniso_U_23 
 _atom_site_aniso_U_13 
 _atom_site_aniso_U_12 
Fe1 0.0209(3) 0.0181(3) 0.0211(3) 0.0005(2) 0.0015(2) 0.0010(2) 
P1 0.0145(5) 0.0155(5) 0.0141(5) -0.0003(4) -0.0015(4) 0.0005(4) 
P2 0.0157(5) 0.0151(5) 0.0171(5) -0.0007(4) -0.0002(4) 0.0009(4) 
P3 0.0154(5) 0.0153(5) 0.0132(5) 0.0016(4) 0.0002(4) -0.0002(4) 
P4 0.0162(5) 0.0142(5) 0.0159(5) 0.0002(4) 0.0000(4) -0.0005(4) 
N1 0.021(2) 0.0189(18) 0.0194(18) -0.0010(14) -0.0022(15) 0.0032(15) 
N2 0.022(2) 0.0191(18) 0.0175(17) 0.0040(14) -0.0013(15) -0.0029(15) 
N3 0.025(2) 0.027(2) 0.032(2) 0.0011(16) 0.0041(17) 0.0068(17) 
N4 0.027(2) 0.0207(19) 0.028(2) -0.0028(15) 0.0012(17) 0.0012(17) 
N5 0.026(2) 0.0207(18) 0.0152(17) -0.0037(15) -0.0007(16) -0.0012(16) 
N6 0.020(2) 0.0213(19) 0.0211(19) -0.0063(15) -0.0004(16) 0.0027(16) 
N7 0.027(2) 0.029(2) 0.0226(19) 0.0118(17) -0.0026(17) -0.0015(17) 
O1 0.0214(19) 0.049(2) 0.049(2) 0.0061(19) 0.0116(16) 0.0002(17) 
O2 0.038(2) 0.0330(19) 0.040(2) 0.0032(15) -0.0059(16) -0.0136(17) 
O3 0.0218(16) 0.0278(17) 0.0236(16) 0.0074(13) 0.0007(13) -0.0036(13) 
O4 0.0212(18) 0.0313(17) 0.0417(19) 0.0019(15) 0.0078(15) -0.0035(14) 
O5 0.0345(19) 0.0375(19) 0.0183(15) 0.0040(14) -0.0033(14) -0.0007(16) 
O6 0.0187(16) 0.0311(17) 0.0346(17) 0.0087(14) -0.0059(14) -0.0036(13) 
O7 0.043(2) 0.0338(19) 0.0224(17) 0.0038(14) -0.0048(15) 0.0020(16) 
O8 0.0229(19) 0.049(2) 0.052(2) 0.0096(18) 0.0026(17) -0.0103(16) 
O9 0.0270(17) 0.0207(17) 0.0268(16) 0.0041(13) -0.0007(13) -0.0007(13) 
O10 0.0309(19) 0.0367(19) 0.0240(17) -0.0003(14) 0.0050(15) 0.0040(16) 
O11 0.0293(18) 0.0346(19) 0.0369(19) 0.0133(15) -0.0059(15) -0.0138(15) 
C1 0.015(2) 0.021(2) 0.018(2) 0.0006(17) -0.0013(17) 0.0067(17) 
C2 0.024(2) 0.026(2) 0.022(2) 0.0015(19) -0.0029(18) 0.000(2) 
C3 0.034(3) 0.041(3) 0.019(2) 0.002(2) -0.005(2) 0.007(2) 
C4 0.036(3) 0.040(3) 0.019(2) 0.010(2) 0.004(2) 0.018(2) 
C5 0.033(3) 0.025(2) 0.033(2) 0.007(2) 0.013(2) 0.004(2) 
C6 0.019(2) 0.022(2) 0.023(2) -0.0005(17) 0.0013(19) 0.0025(18) 
C7 0.015(2) 0.016(2) 0.019(2) 0.0011(16) -0.0008(17) -0.0015(16) 
C8 0.020(2) 0.019(2) 0.017(2) -0.0037(16) -0.0029(17) 0.0001(17) 
C9 0.022(2) 0.024(2) 0.024(2) -0.0054(19) 0.0036(19) 0.0007(19) 
C10 0.013(2) 0.026(2) 0.033(3) 0.006(2) -0.0012(19) 0.0018(18) 
C11 0.022(2) 0.021(2) 0.021(2) 0.0049(17) -0.0044(18) -0.0028(18) 
C12 0.016(2) 0.017(2) 0.0134(19) 0.0000(15) -0.0021(16) 0.0006(16) 
C13 0.017(2) 0.021(2) 0.014(2) -0.0014(16) -0.0011(17) -0.0036(17) 
C14 0.017(2) 0.022(2) 0.019(2) 0.0028(16) -0.0021(17) 0.0005(17) 
C15 0.025(2) 0.019(2) 0.026(2) 0.0044(18) -0.0027(19) -0.0031(18) 
C16 0.027(2) 0.023(2) 0.016(2) -0.0001(17) 0.0031(18) -0.0107(19) 
C17 0.017(2) 0.036(3) 0.022(2) -0.002(2) -0.0029(18) 0.000(2) 
C18 0.020(2) 0.024(2) 0.024(2) 0.0001(18) -0.0074(19) 0.0004(18) 
C19 0.022(2) 0.018(2) 0.019(2) -0.0021(17) -0.0022(18) 0.0069(17) 
C20 0.020(2) 0.017(2) 0.029(2) -0.0013(18) -0.0007(18) -0.0003(18) 
C21 0.019(2) 0.025(2) 0.036(3) -0.004(2) -0.0068(19) 0.0041(19) 
C22 0.031(3) 0.031(3) 0.022(2) -0.004(2) -0.008(2) 0.008(2) 
C23 0.031(3) 0.027(2) 0.023(2) 0.0023(19) 0.000(2) 0.009(2) 
C24 0.018(2) 0.022(2) 0.023(2) -0.0014(18) 0.0024(18) 0.0040(18) 
C25 0.022(2) 0.019(2) 0.014(2) -0.0029(16) -0.0019(17) -0.0048(17) 
C26 0.031(3) 0.025(2) 0.024(2) -0.0029(18) 0.007(2) 0.000(2) 
C27 0.056(4) 0.022(2) 0.023(2) -0.0058(19) 0.008(2) -0.010(2) 
C28 0.053(4) 0.032(3) 0.025(3) -0.002(2) 0.000(2) -0.025(3) 
C29 0.027(3) 0.051(3) 0.028(3) -0.001(2) -0.007(2) -0.015(3) 
C30 0.024(3) 0.027(2) 0.025(2) 0.0020(19) 0.000(2) -0.003(2) 
C31 0.020(2) 0.019(2) 0.015(2) -0.0025(16) -0.0018(16) -0.0032(17) 
C32 0.022(2) 0.031(3) 0.025(2) 0.0013(19) -0.0005(19) 0.004(2) 
C33 0.030(3) 0.043(3) 0.023(2) 0.013(2) 0.003(2) -0.001(2) 
C34 0.031(3) 0.050(3) 0.022(2) -0.004(2) 0.006(2) -0.013(2) 
C35 0.025(3) 0.039(3) 0.032(3) -0.011(2) 0.009(2) 0.000(2) 
C36 0.024(2) 0.023(2) 0.028(2) -0.0008(19) 0.006(2) 0.003(2) 
C37 0.015(2) 0.021(2) 0.015(2) 0.0010(16) -0.0020(16) -0.0037(16) 
C38 0.019(2) 0.022(2) 0.023(2) 0.0006(17) 0.001(2) -0.0009(17) 
C39 0.026(2) 0.021(2) 0.027(2) -0.0057(18) 0.009(2) -0.0032(19) 
C40 0.031(3) 0.033(2) 0.018(2) -0.0086(19) 0.002(2) -0.012(2) 
C41 0.037(3) 0.031(3) 0.017(2) 0.0002(18) -0.008(2) -0.009(2) 
C42 0.030(3) 0.019(2) 0.022(2) 0.0026(18) -0.0041(19) -0.002(2) 
C43 0.013(2) 0.0100(18) 0.019(2) -0.0004(15) 0.0015(16) 0.0009(15) 
C44 0.021(2) 0.027(2) 0.017(2) 0.0041(18) -0.0013(18) 0.0032(19) 
C45 0.014(2) 0.029(2) 0.027(2) 0.0076(19) 0.0022(18) 0.0000(18) 
C46 0.016(2) 0.019(2) 0.035(3) -0.0009(19) -0.0003(19) -0.0020(18) 
C47 0.021(2) 0.021(2) 0.025(2) -0.0039(18) -0.0054(19) 0.0047(18) 
C48 0.015(2) 0.020(2) 0.017(2) 0.0001(17) 0.0013(17) 0.0026(17) 
C49 0.019(2) 0.019(2) 0.0120(19) 0.0047(16) 0.0028(17) 0.0022(17) 
C50 0.022(2) 0.024(2) 0.019(2) -0.0011(18) -0.0028(18) 0.0032(19) 
C51 0.028(3) 0.019(2) 0.027(2) -0.0066(18) -0.0054(19) 0.0061(19) 
C52 0.026(3) 0.030(3) 0.024(2) -0.001(2) -0.001(2) 0.011(2) 
C53 0.022(3) 0.029(3) 0.038(3) 0.004(2) -0.006(2) 0.0025(19) 
C54 0.021(2) 0.021(2) 0.034(3) 0.002(2) -0.003(2) 0.0014(18) 
C55 0.018(2) 0.018(2) 0.014(2) 0.0026(16) 0.0008(16) 0.0026(17) 
C56 0.022(2) 0.022(2) 0.017(2) -0.0002(17) -0.0018(18) -0.0014(18) 
C57 0.027(3) 0.026(2) 0.021(2) -0.0073(18) -0.0047(19) 0.0035(19) 
C58 0.029(3) 0.032(3) 0.017(2) -0.0049(19) 0.0049(19) 0.007(2) 
C59 0.022(2) 0.026(2) 0.026(2) 0.005(2) 0.0015(18) -0.002(2) 
C60 0.029(2) 0.016(2) 0.021(2) -0.0012(17) 0.0016(19) -0.0026(18) 
C61 0.019(2) 0.018(2) 0.019(2) 0.0021(16) 0.0006(17) -0.0023(17) 
C62 0.021(2) 0.023(2) 0.028(2) -0.0005(19) -0.0015(19) -0.0050(19) 
C63 0.019(2) 0.033(3) 0.038(3) 0.006(2) -0.008(2) -0.003(2) 
C64 0.034(3) 0.032(3) 0.029(3) 0.004(2) -0.009(2) -0.010(2) 
C65 0.038(3) 0.026(2) 0.019(2) -0.0011(19) 0.001(2) -0.010(2) 
C66 0.023(2) 0.022(2) 0.023(2) 0.0027(18) 0.0032(19) -0.0031(19) 
C67 0.023(2) 0.018(2) 0.0114(19) 0.0007(15) 0.0018(17) 0.0035(17) 
C68 0.031(3) 0.018(2) 0.017(2) 0.0003(16) -0.0012(18) 0.0032(18) 
C69 0.052(3) 0.017(2) 0.019(2) -0.0002(17) 0.002(2) 0.010(2) 
C70 0.046(3) 0.037(3) 0.019(2) 0.008(2) 0.009(2) 0.024(2) 
C71 0.026(3) 0.045(3) 0.023(2) 0.007(2) 0.005(2) 0.012(2) 
C72 0.023(2) 0.030(2) 0.018(2) 0.0057(19) 0.0018(18) 0.007(2) 
 
_geom_special_details 
; 
 All esds (except the esd in the dihedral angle between two l.s. planes) 
 are estimated using the full covariance matrix.  The cell esds are taken 
 into account individually in the estimation of esds in distances, angles 
 and torsion angles; correlations between esds in cell parameters are only 
 used when they are defined by crystal symmetry.  An approximate (isotropic) 
 treatment of cell esds is used for estimating esds involving l.s. planes. 
; 
 
loop_ 
 _geom_bond_atom_site_label_1 
 _geom_bond_atom_site_label_2 
 _geom_bond_distance 
 _geom_bond_site_symmetry_2 
 _geom_bond_publ_flag 
Fe1 N3 1.723(4) . ? 
Fe1 N4 1.730(4) . ? 
Fe1 O3 2.133(3) . ? 
Fe1 O6 2.142(3) . ? 
Fe1 O9 2.232(3) . ? 
Fe1 O10 2.350(3) . ? 
P1 N1 1.574(3) . ? 
P1 C7 1.795(4) . ? 
P1 C13 1.799(4) . ? 
P1 C1 1.810(4) . ? 
P2 N1 1.578(3) . ? 
P2 C19 1.794(4) . ? 
P2 C31 1.802(4) . ? 
P2 C25 1.808(4) . ? 
P3 N2 1.575(3) . ? 
P3 C37 1.786(4) . ? 
P3 C43 1.796(4) . ? 
P3 C49 1.799(4) . ? 
P4 N2 1.577(3) . ? 
P4 C67 1.799(4) . ? 
P4 C55 1.800(4) . ? 
P4 C61 1.808(4) . ? 
N3 O1 1.172(5) . ? 
N4 O2 1.170(5) . ? 
N5 O4 1.227(5) . ? 
N5 O5 1.252(5) . ? 
N5 O3 1.279(4) . ? 
N6 O7 1.233(5) . ? 
N6 O8 1.239(5) . ? 
N6 O6 1.285(4) . ? 
N7 O11 1.241(5) . ? 
N7 O10 1.270(5) . ? 
N7 O9 1.274(5) . ? 
C1 C2 1.396(6) . ? 
C1 C6 1.397(6) . ? 
C2 C3 1.388(6) . ? 
C2 H2 0.9500 . ? 
C3 C4 1.379(7) . ? 
C3 H3 0.9500 . ? 
C4 C5 1.393(7) . ? 
C4 H4 0.9500 . ? 
C5 C6 1.371(6) . ? 
C5 H5 0.9500 . ? 
C6 H6 0.9500 . ? 
C7 C12 1.391(5) . ? 
C7 C8 1.414(6) . ? 
C8 C9 1.390(6) . ? 
C8 H8 0.9500 . ? 
C9 C10 1.384(6) . ? 
C9 H9 0.9500 . ? 
C10 C11 1.391(6) . ? 
C10 H10 0.9500 . ? 
C11 C12 1.398(6) . ? 
C11 H11 0.9500 . ? 
C12 H12 0.9500 . ? 
C13 C18 1.398(6) . ? 
C13 C14 1.400(6) . ? 
C14 C15 1.393(6) . ? 
C14 H14 0.9500 . ? 
C15 C16 1.377(6) . ? 
C15 H15 0.9500 . ? 
C16 C17 1.394(6) . ? 
C16 H16 0.9500 . ? 
C17 C18 1.376(6) . ? 
C17 H17 0.9500 . ? 
C18 H18 0.9500 . ? 
C19 C20 1.398(6) . ? 
C19 C24 1.402(6) . ? 
C20 C21 1.368(6) . ? 
C20 H20 0.9500 . ? 
C21 C22 1.373(7) . ? 
C21 H21 0.9500 . ? 
C22 C23 1.378(7) . ? 
C22 H22 0.9500 . ? 
C23 C24 1.387(6) . ? 
C23 H23 0.9500 . ? 
C24 H24 0.9500 . ? 
C25 C26 1.389(6) . ? 
C25 C30 1.391(6) . ? 
C26 C27 1.385(6) . ? 
C26 H26 0.9500 . ? 
C27 C28 1.378(8) . ? 
C27 H27 0.9500 . ? 
C28 C29 1.362(7) . ? 
C28 H28 0.9500 . ? 
C29 C30 1.395(6) . ? 
C29 H29 0.9500 . ? 
C30 H30 0.9500 . ? 
C31 C32 1.394(6) . ? 
C31 C36 1.394(6) . ? 
C32 C33 1.386(6) . ? 
C32 H32 0.9500 . ? 
C33 C34 1.365(7) . ? 
C33 H33 0.9500 . ? 
C34 C35 1.398(7) . ? 
C34 H34 0.9500 . ? 
C35 C36 1.393(6) . ? 
C35 H35 0.9500 . ? 
C36 H36 0.9500 . ? 
C37 C42 1.382(6) . ? 
C37 C38 1.396(6) . ? 
C38 C39 1.392(6) . ? 
C38 H38 0.9500 . ? 
C39 C40 1.389(6) . ? 
C39 H39 0.9500 . ? 
C40 C41 1.374(7) . ? 
C40 H40 0.9500 . ? 
C41 C42 1.411(6) . ? 
C41 H41 0.9500 . ? 
C42 H42 0.9500 . ? 
C43 C44 1.376(6) . ? 
C43 C48 1.378(6) . ? 
C44 C45 1.373(6) . ? 
C44 H44 0.9500 . ? 
C45 C46 1.361(6) . ? 
C45 H45 0.9500 . ? 
C46 C47 1.369(6) . ? 
C46 H46 0.9500 . ? 
C47 C48 1.378(6) . ? 
C47 H47 0.9500 . ? 
C48 H48 0.9500 . ? 
C49 C50 1.384(6) . ? 
C49 C54 1.403(6) . ? 
C50 C51 1.393(6) . ? 
C50 H50 0.9500 . ? 
C51 C52 1.384(6) . ? 
C51 H51 0.9500 . ? 
C52 C53 1.394(7) . ? 
C52 H52 0.9500 . ? 
C53 C54 1.376(6) . ? 
C53 H53 0.9500 . ? 
C54 H54 0.9500 . ? 
C55 C56 1.384(6) . ? 
C55 C60 1.397(6) . ? 
C56 C57 1.393(6) . ? 
C56 H56 0.9500 . ? 
C57 C58 1.383(6) . ? 
C57 H57 0.9500 . ? 
C58 C59 1.374(6) . ? 
C58 H58 0.9500 . ? 
C59 C60 1.384(6) . ? 
C59 H59 0.9500 . ? 
C60 H60 0.9500 . ? 
C61 C62 1.383(6) . ? 
C61 C66 1.397(6) . ? 
C62 C63 1.386(6) . ? 
C62 H62 0.9500 . ? 
C63 C64 1.396(7) . ? 
C63 H63 0.9500 . ? 
C64 C65 1.376(7) . ? 
C64 H64 0.9500 . ? 
C65 C66 1.387(6) . ? 
C65 H65 0.9500 . ? 
C66 H66 0.9500 . ? 
C67 C72 1.391(6) . ? 
C67 C68 1.399(6) . ? 
C68 C69 1.383(6) . ? 
C68 H68 0.9500 . ? 
C69 C70 1.376(7) . ? 
C69 H69 0.9500 . ? 
C70 C71 1.389(7) . ? 
C70 H70 0.9500 . ? 
C71 C72 1.374(6) . ? 
C71 H71 0.9500 . ? 
C72 H72 0.9500 . ? 
 
loop_ 
 _geom_angle_atom_site_label_1 
 _geom_angle_atom_site_label_2 
 _geom_angle_atom_site_label_3 
 _geom_angle 
 _geom_angle_site_symmetry_1 
 _geom_angle_site_symmetry_3 
 _geom_angle_publ_flag 
N3 Fe1 N4 99.53(19) . . ? 
N3 Fe1 O3 101.15(15) . . ? 
N4 Fe1 O3 97.22(15) . . ? 
N3 Fe1 O6 103.09(15) . . ? 
N4 Fe1 O6 99.04(15) . . ? 
O3 Fe1 O6 147.99(11) . . ? 
N3 Fe1 O9 154.13(16) . . ? 
N4 Fe1 O9 106.33(15) . . ? 
O3 Fe1 O9 75.41(11) . . ? 
O6 Fe1 O9 73.64(11) . . ? 
N3 Fe1 O10 97.79(15) . . ? 
N4 Fe1 O10 162.68(15) . . ? 
O3 Fe1 O10 79.56(11) . . ? 
O6 Fe1 O10 76.72(11) . . ? 
O9 Fe1 O10 56.35(11) . . ? 
N1 P1 C7 107.22(19) . . ? 
N1 P1 C13 112.82(19) . . ? 
C7 P1 C13 107.86(19) . . ? 
N1 P1 C1 113.82(18) . . ? 
C7 P1 C1 106.32(19) . . ? 
C13 P1 C1 108.44(19) . . ? 
N1 P2 C19 115.91(19) . . ? 
N1 P2 C31 108.68(19) . . ? 
C19 P2 C31 106.90(19) . . ? 
N1 P2 C25 108.5(2) . . ? 
C19 P2 C25 108.1(2) . . ? 
C31 P2 C25 108.55(19) . . ? 
N2 P3 C37 112.74(18) . . ? 
N2 P3 C43 107.51(18) . . ? 
C37 P3 C43 109.36(18) . . ? 
N2 P3 C49 112.79(18) . . ? 
C37 P3 C49 107.99(19) . . ? 
C43 P3 C49 106.22(18) . . ? 
N2 P4 C67 107.42(19) . . ? 
N2 P4 C55 109.59(19) . . ? 
C67 P4 C55 109.44(18) . . ? 
N2 P4 C61 116.37(18) . . ? 
C67 P4 C61 108.16(19) . . ? 
C55 P4 C61 105.73(19) . . ? 
P1 N1 P2 141.9(2) . . ? 
P3 N2 P4 143.2(2) . . ? 
O1 N3 Fe1 148.3(4) . . ? 
O2 N4 Fe1 148.4(3) . . ? 
O4 N5 O5 122.6(4) . . ? 
O4 N5 O3 120.4(4) . . ? 
O5 N5 O3 117.1(3) . . ? 
O7 N6 O8 122.6(4) . . ? 
O7 N6 O6 118.7(3) . . ? 
O8 N6 O6 118.6(3) . . ? 
O11 N7 O10 123.0(4) . . ? 
O11 N7 O9 120.2(4) . . ? 
O10 N7 O9 116.8(4) . . ? 
N5 O3 Fe1 124.5(3) . . ? 
N6 O6 Fe1 124.4(2) . . ? 
N7 O9 Fe1 96.1(2) . . ? 
N7 O10 Fe1 90.7(2) . . ? 
C2 C1 C6 119.7(4) . . ? 
C2 C1 P1 123.5(3) . . ? 
C6 C1 P1 116.8(3) . . ? 
C3 C2 C1 119.5(4) . . ? 
C3 C2 H2 120.3 . . ? 
C1 C2 H2 120.3 . . ? 
C4 C3 C2 119.9(4) . . ? 
C4 C3 H3 120.0 . . ? 
C2 C3 H3 120.0 . . ? 
C3 C4 C5 121.1(4) . . ? 
C3 C4 H4 119.5 . . ? 
C5 C4 H4 119.5 . . ? 
C6 C5 C4 119.0(4) . . ? 
C6 C5 H5 120.5 . . ? 
C4 C5 H5 120.5 . . ? 
C5 C6 C1 120.8(4) . . ? 
C5 C6 H6 119.6 . . ? 
C1 C6 H6 119.6 . . ? 
C12 C7 C8 119.9(4) . . ? 
C12 C7 P1 119.4(3) . . ? 
C8 C7 P1 120.7(3) . . ? 
C9 C8 C7 119.3(4) . . ? 
C9 C8 H8 120.3 . . ? 
C7 C8 H8 120.3 . . ? 
C10 C9 C8 120.9(4) . . ? 
C10 C9 H9 119.5 . . ? 
C8 C9 H9 119.5 . . ? 
C9 C10 C11 119.6(4) . . ? 
C9 C10 H10 120.2 . . ? 
C11 C10 H10 120.2 . . ? 
C10 C11 C12 120.7(4) . . ? 
C10 C11 H11 119.6 . . ? 
C12 C11 H11 119.6 . . ? 
C7 C12 C11 119.6(4) . . ? 
C7 C12 H12 120.2 . . ? 
C11 C12 H12 120.2 . . ? 
C18 C13 C14 118.8(4) . . ? 
C18 C13 P1 119.6(3) . . ? 
C14 C13 P1 121.5(3) . . ? 
C15 C14 C13 120.4(4) . . ? 
C15 C14 H14 119.8 . . ? 
C13 C14 H14 119.8 . . ? 
C16 C15 C14 120.1(4) . . ? 
C16 C15 H15 120.0 . . ? 
C14 C15 H15 120.0 . . ? 
C15 C16 C17 119.8(4) . . ? 
C15 C16 H16 120.1 . . ? 
C17 C16 H16 120.1 . . ? 
C18 C17 C16 120.5(4) . . ? 
C18 C17 H17 119.7 . . ? 
C16 C17 H17 119.7 . . ? 
C17 C18 C13 120.4(4) . . ? 
C17 C18 H18 119.8 . . ? 
C13 C18 H18 119.8 . . ? 
C20 C19 C24 119.1(4) . . ? 
C20 C19 P2 119.2(3) . . ? 
C24 C19 P2 121.3(3) . . ? 
C21 C20 C19 120.2(4) . . ? 
C21 C20 H20 119.9 . . ? 
C19 C20 H20 119.9 . . ? 
C20 C21 C22 120.3(4) . . ? 
C20 C21 H21 119.8 . . ? 
C22 C21 H21 119.8 . . ? 
C21 C22 C23 120.9(4) . . ? 
C21 C22 H22 119.6 . . ? 
C23 C22 H22 119.6 . . ? 
C22 C23 C24 119.7(4) . . ? 
C22 C23 H23 120.2 . . ? 
C24 C23 H23 120.2 . . ? 
C23 C24 C19 119.8(4) . . ? 
C23 C24 H24 120.1 . . ? 
C19 C24 H24 120.1 . . ? 
C26 C25 C30 119.1(4) . . ? 
C26 C25 P2 121.6(3) . . ? 
C30 C25 P2 119.3(3) . . ? 
C27 C26 C25 120.5(5) . . ? 
C27 C26 H26 119.7 . . ? 
C25 C26 H26 119.7 . . ? 
C28 C27 C26 120.0(5) . . ? 
C28 C27 H27 120.0 . . ? 
C26 C27 H27 120.0 . . ? 
C29 C28 C27 119.9(5) . . ? 
C29 C28 H28 120.0 . . ? 
C27 C28 H28 120.0 . . ? 
C28 C29 C30 121.0(5) . . ? 
C28 C29 H29 119.5 . . ? 
C30 C29 H29 119.5 . . ? 
C25 C30 C29 119.4(4) . . ? 
C25 C30 H30 120.3 . . ? 
C29 C30 H30 120.3 . . ? 
C32 C31 C36 120.4(4) . . ? 
C32 C31 P2 118.9(3) . . ? 
C36 C31 P2 120.7(3) . . ? 
C33 C32 C31 119.9(4) . . ? 
C33 C32 H32 120.1 . . ? 
C31 C32 H32 120.1 . . ? 
C34 C33 C32 119.8(5) . . ? 
C34 C33 H33 120.1 . . ? 
C32 C33 H33 120.1 . . ? 
C33 C34 C35 121.4(4) . . ? 
C33 C34 H34 119.3 . . ? 
C35 C34 H34 119.3 . . ? 
C36 C35 C34 119.2(5) . . ? 
C36 C35 H35 120.4 . . ? 
C34 C35 H35 120.4 . . ? 
C35 C36 C31 119.3(4) . . ? 
C35 C36 H36 120.3 . . ? 
C31 C36 H36 120.3 . . ? 
C42 C37 C38 119.8(4) . . ? 
C42 C37 P3 122.1(3) . . ? 
C38 C37 P3 118.1(3) . . ? 
C39 C38 C37 120.5(4) . . ? 
C39 C38 H38 119.7 . . ? 
C37 C38 H38 119.7 . . ? 
C40 C39 C38 119.5(4) . . ? 
C40 C39 H39 120.2 . . ? 
C38 C39 H39 120.2 . . ? 
C41 C40 C39 120.4(4) . . ? 
C41 C40 H40 119.8 . . ? 
C39 C40 H40 119.8 . . ? 
C40 C41 C42 120.4(4) . . ? 
C40 C41 H41 119.8 . . ? 
C42 C41 H41 119.8 . . ? 
C37 C42 C41 119.4(4) . . ? 
C37 C42 H42 120.3 . . ? 
C41 C42 H42 120.3 . . ? 
C44 C43 C48 119.4(4) . . ? 
C44 C43 P3 121.1(3) . . ? 
C48 C43 P3 119.4(3) . . ? 
C45 C44 C43 120.5(4) . . ? 
C45 C44 H44 119.8 . . ? 
C43 C44 H44 119.8 . . ? 
C46 C45 C44 119.9(4) . . ? 
C46 C45 H45 120.0 . . ? 
C44 C45 H45 120.0 . . ? 
C45 C46 C47 120.3(4) . . ? 
C45 C46 H46 119.8 . . ? 
C47 C46 H46 119.8 . . ? 
C46 C47 C48 120.1(4) . . ? 
C46 C47 H47 119.9 . . ? 
C48 C47 H47 119.9 . . ? 
C43 C48 C47 119.8(4) . . ? 
C43 C48 H48 120.1 . . ? 
C47 C48 H48 120.1 . . ? 
C50 C49 C54 119.5(4) . . ? 
C50 C49 P3 121.9(3) . . ? 
C54 C49 P3 118.5(3) . . ? 
C49 C50 C51 119.7(4) . . ? 
C49 C50 H50 120.2 . . ? 
C51 C50 H50 120.2 . . ? 
C52 C51 C50 120.1(4) . . ? 
C52 C51 H51 119.9 . . ? 
C50 C51 H51 119.9 . . ? 
C51 C52 C53 120.7(4) . . ? 
C51 C52 H52 119.7 . . ? 
C53 C52 H52 119.7 . . ? 
C54 C53 C52 119.0(4) . . ? 
C54 C53 H53 120.5 . . ? 
C52 C53 H53 120.5 . . ? 
C53 C54 C49 121.0(4) . . ? 
C53 C54 H54 119.5 . . ? 
C49 C54 H54 119.5 . . ? 
C56 C55 C60 120.1(4) . . ? 
C56 C55 P4 119.0(3) . . ? 
C60 C55 P4 120.9(3) . . ? 
C55 C56 C57 119.7(4) . . ? 
C55 C56 H56 120.1 . . ? 
C57 C56 H56 120.1 . . ? 
C58 C57 C56 119.5(4) . . ? 
C58 C57 H57 120.2 . . ? 
C56 C57 H57 120.2 . . ? 
C59 C58 C57 121.1(4) . . ? 
C59 C58 H58 119.5 . . ? 
C57 C58 H58 119.5 . . ? 
C58 C59 C60 119.7(4) . . ? 
C58 C59 H59 120.1 . . ? 
C60 C59 H59 120.1 . . ? 
C59 C60 C55 119.9(4) . . ? 
C59 C60 H60 120.1 . . ? 
C55 C60 H60 120.1 . . ? 
C62 C61 C66 119.9(4) . . ? 
C62 C61 P4 119.5(3) . . ? 
C66 C61 P4 120.5(3) . . ? 
C61 C62 C63 121.3(4) . . ? 
C61 C62 H62 119.4 . . ? 
C63 C62 H62 119.4 . . ? 
C62 C63 C64 118.3(4) . . ? 
C62 C63 H63 120.9 . . ? 
C64 C63 H63 120.9 . . ? 
C65 C64 C63 121.0(4) . . ? 
C65 C64 H64 119.5 . . ? 
C63 C64 H64 119.5 . . ? 
C64 C65 C66 120.5(4) . . ? 
C64 C65 H65 119.8 . . ? 
C66 C65 H65 119.8 . . ? 
C65 C66 C61 119.1(4) . . ? 
C65 C66 H66 120.4 . . ? 
C61 C66 H66 120.4 . . ? 
C72 C67 C68 119.7(4) . . ? 
C72 C67 P4 119.2(3) . . ? 
C68 C67 P4 121.1(3) . . ? 
C69 C68 C67 119.9(4) . . ? 
C69 C68 H68 120.1 . . ? 
C67 C68 H68 120.1 . . ? 
C70 C69 C68 119.6(4) . . ? 
C70 C69 H69 120.2 . . ? 
C68 C69 H69 120.2 . . ? 
C69 C70 C71 120.9(4) . . ? 
C69 C70 H70 119.5 . . ? 
C71 C70 H70 119.5 . . ? 
C72 C71 C70 119.7(5) . . ? 
C72 C71 H71 120.2 . . ? 
C70 C71 H71 120.2 . . ? 
C71 C72 C67 120.1(4) . . ? 
C71 C72 H72 119.9 . . ? 
C67 C72 H72 119.9 . . ? 
 
_diffrn_measured_fraction_theta_max    0.997 
_diffrn_reflns_theta_full              26.41 
_diffrn_measured_fraction_theta_full   0.997 
_refine_diff_density_max    0.759 
_refine_diff_density_min   -0.734 
_refine_diff_density_rms    0.232 

complex 5   ===END

complex 7
 
data_mo_120747lt_0m 
 
_audit_creation_method            SHELXL-97 
_chemical_name_systematic 
; 
 ? 
; 
_chemical_name_common             ? 
_chemical_melting_point           ? 
_chemical_formula_moiety          ? 
_chemical_formula_sum 
 'C10 H20 Fe N4 O3 S4' 
_chemical_formula_weight          428.39 
 
loop_ 
 _atom_type_symbol 
 _atom_type_description 
 _atom_type_scat_dispersion_real 
 _atom_type_scat_dispersion_imag 
 _atom_type_scat_source 
 'C'  'C'   0.0033   0.0016 
 'International Tables Vol C Tables 4.2.6.8 and 6.1.1.4' 
 'H'  'H'   0.0000   0.0000 
 'International Tables Vol C Tables 4.2.6.8 and 6.1.1.4' 
 'N'  'N'   0.0061   0.0033 
 'International Tables Vol C Tables 4.2.6.8 and 6.1.1.4' 
 'O'  'O'   0.0106   0.0060 
 'International Tables Vol C Tables 4.2.6.8 and 6.1.1.4' 
 'S'  'S'   0.1246   0.1234 
 'International Tables Vol C Tables 4.2.6.8 and 6.1.1.4' 
 'Fe'  'Fe'   0.3463   0.8444 
 'International Tables Vol C Tables 4.2.6.8 and 6.1.1.4' 
 
_symmetry_cell_setting            monoclinic
_symmetry_space_group_name_H-M   'P 1 21/c 1'
_symmetry_space_group_name_hall  '-P 2ybc' 
 
loop_ 
 _symmetry_equiv_pos_as_xyz 
 'x, y, z' 
 '-x, y+1/2, -z+1/2' 
 '-x, -y, -z' 
 'x, -y-1/2, z-1/2' 
 
_cell_length_a                    10.1784(5) 
_cell_length_b                    16.0459(8) 
_cell_length_c                    11.2136(5) 
_cell_angle_alpha                 90.00 
_cell_angle_beta                  101.6590(10) 
_cell_angle_gamma                 90.00 
_cell_volume                      1793.64(15) 
_cell_formula_units_Z             4 
_cell_measurement_temperature     100(2) 
_cell_measurement_reflns_used     6051
_cell_measurement_theta_min       2.7740
_cell_measurement_theta_max       26.4064 
 
_exptl_crystal_description        Lump
_exptl_crystal_colour             Black 
_exptl_crystal_size_max           0.20
_exptl_crystal_size_mid           0.17
_exptl_crystal_size_min           0.07
_exptl_crystal_density_meas       'not measured'
_exptl_crystal_density_diffrn     1.586 
_exptl_crystal_density_method     'not measured' 
_exptl_crystal_F_000              888 
_exptl_absorpt_coefficient_mu     1.321 
_exptl_absorpt_correction_type    multi-scan
_exptl_absorpt_correction_T_min   0.8844  
_exptl_absorpt_correction_T_max   0.9486
_exptl_absorpt_process_details    'SADABS V2008/1 (Bruker AXS)'
 
_exptl_special_details 
; 
 ? 
; 
 
_diffrn_ambient_temperature       100(2) 
_diffrn_radiation_wavelength      0.71073 
_diffrn_radiation_type            MoK\a 
_diffrn_radiation_source          'fine-focus sealed tube' 
_diffrn_radiation_monochromator   graphite 
_diffrn_measurement_device_type   'Bruker APEX-II CCD'
_diffrn_measurement_method        '\f and \w scans'
_diffrn_detector_area_resol_mean  8.3333
_diffrn_reflns_number             14137 
_diffrn_reflns_av_R_equivalents   0.0227 
_diffrn_reflns_av_sigmaI/netI     0.0220 
_diffrn_reflns_limit_h_min        -11 
_diffrn_reflns_limit_h_max        12 
_diffrn_reflns_limit_k_min        -20 
_diffrn_reflns_limit_k_max        19 
_diffrn_reflns_limit_l_min        -14 
_diffrn_reflns_limit_l_max        14 
_diffrn_reflns_theta_min          2.04 
_diffrn_reflns_theta_max          26.43 
_reflns_number_total              3685 
_reflns_number_gt                 3233 
_reflns_threshold_expression      >2sigma(I) 
 
_computing_data_collection        'APEX2 (Bruker AXS, 2010)'
_computing_cell_refinement        'SAINT V7.68A (Bruker AXS, 2009)'
_computing_data_reduction         'SAINT V7.68A (Bruker AXS, 2009)'
_computing_structure_solution     'SHELXS-97 (Sheldrick, 2008)'
_computing_structure_refinement   'SHELXL-97 (Sheldrick, 2008)'
_computing_molecular_graphics     'SHELXTL (Sheldrick, 2008)'
_computing_publication_material   'SHELXTL'
 
_refine_special_details 
; 
 Refinement of F^2^ against ALL reflections.  The weighted R-factor wR and 
 goodness of fit S are based on F^2^, conventional R-factors R are based 
 on F, with F set to zero for negative F^2^. The threshold expression of 
 F^2^ > 2sigma(F^2^) is used only for calculating R-factors(gt) etc. and is 
 not relevant to the choice of reflections for refinement.  R-factors based 
 on F^2^ are statistically about twice as large as those based on F, and R- 
 factors based on ALL data will be even larger. 
; 
 
_refine_ls_structure_factor_coef  Fsqd  
_refine_ls_matrix_type            full 
_refine_ls_weighting_scheme       calc  
_refine_ls_weighting_details 
 'calc w=1/[\s^2^(Fo^2^)+(0.0221P)^2^+0.9848P] where P=(Fo^2^+2Fc^2^)/3' 
_atom_sites_solution_primary      direct 
_atom_sites_solution_secondary    difmap 
_atom_sites_solution_hydrogens    geom 
_refine_ls_hydrogen_treatment     constr
_refine_ls_extinction_method      none 
_refine_ls_extinction_coef        ? 
_refine_ls_number_reflns          3685 
_refine_ls_number_parameters      203 
_refine_ls_number_restraints      0 
_refine_ls_R_factor_all           0.0297 
_refine_ls_R_factor_gt            0.0233 
_refine_ls_wR_factor_ref          0.0533 
_refine_ls_wR_factor_gt           0.0513 
_refine_ls_goodness_of_fit_ref    1.030 
_refine_ls_restrained_S_all       1.030 
_refine_ls_shift/su_max           0.002 
_refine_ls_shift/su_mean          0.000 
 
loop_ 
 _atom_site_label 
 _atom_site_type_symbol 
 _atom_site_fract_x 
 _atom_site_fract_y 
 _atom_site_fract_z 
 _atom_site_U_iso_or_equiv 
 _atom_site_adp_type 
 _atom_site_occupancy 
 _atom_site_symmetry_multiplicity 
 _atom_site_calc_flag 
 _atom_site_refinement_flags 
 _atom_site_disorder_assembly 
 _atom_site_disorder_group 
Fe1 Fe 0.21758(2) 0.008636(14) 0.75547(2) 0.01359(7) Uani 1 1 d . . . 
S1 S 0.29932(4) 0.04964(3) 0.58690(3) 0.01605(10) Uani 1 1 d . . . 
S2 S 0.43608(4) 0.05083(3) 0.83200(3) 0.01744(10) Uani 1 1 d . . . 
S3 S 0.18345(4) 0.00923(3) 0.95204(4) 0.01568(9) Uani 1 1 d . . . 
S4 S 0.14671(4) 0.14290(3) 0.78462(3) 0.01606(10) Uani 1 1 d . . . 
N1 N 0.54185(14) 0.12168(9) 0.65391(12) 0.0168(3) Uani 1 1 d . . . 
N2 N 0.11373(14) 0.16296(9) 1.01536(12) 0.0156(3) Uani 1 1 d . . . 
N3 N 0.28564(15) -0.10810(10) 0.76886(12) 0.0203(3) Uani 1 1 d . . . 
N4 N 0.06825(14) -0.02246(9) 0.67838(12) 0.0165(3) Uani 1 1 d . . . 
O1 O 0.22925(16) -0.15731(9) 0.82977(15) 0.0414(4) Uani 1 1 d . . . 
O2 O 0.37197(14) -0.13469(9) 0.71930(12) 0.0321(3) Uani 1 1 d . . . 
O3 O -0.03122(13) -0.04554(9) 0.61959(12) 0.0325(3) Uani 1 1 d . . . 
C1 C 0.44335(16) 0.08001(10) 0.68615(14) 0.0151(3) Uani 1 1 d . . . 
C2 C 0.66323(17) 0.14489(11) 0.74370(16) 0.0200(4) Uani 1 1 d . . . 
H2A H 0.6433 0.1439 0.8265 0.024 Uiso 1 1 calc R . . 
H2B H 0.6905 0.2023 0.7271 0.024 Uiso 1 1 calc R . . 
C3 C 0.77649(18) 0.08545(12) 0.73778(17) 0.0270(4) Uani 1 1 d . . . 
H3C H 0.7482 0.0284 0.7510 0.040 Uiso 1 1 calc R . . 
H3D H 0.8546 0.1000 0.8009 0.040 Uiso 1 1 calc R . . 
H3E H 0.8003 0.0893 0.6575 0.040 Uiso 1 1 calc R . . 
C4 C 0.53625(18) 0.14685(12) 0.52654(15) 0.0206(4) Uani 1 1 d . . . 
H4A H 0.4813 0.1062 0.4715 0.025 Uiso 1 1 calc R . . 
H4B H 0.6280 0.1461 0.5096 0.025 Uiso 1 1 calc R . . 
C5 C 0.4770(2) 0.23302(12) 0.50043(18) 0.0292(4) Uani 1 1 d . . . 
H5A H 0.3846 0.2333 0.5133 0.044 Uiso 1 1 calc R . . 
H5B H 0.4774 0.2481 0.4158 0.044 Uiso 1 1 calc R . . 
H5C H 0.5306 0.2734 0.5553 0.044 Uiso 1 1 calc R . . 
C6 C 0.14250(16) 0.11306(10) 0.93104(14) 0.0146(3) Uani 1 1 d . . . 
C7 C 0.07792(18) 0.25116(10) 0.99056(15) 0.0186(4) Uani 1 1 d . . . 
H7A H 0.1054 0.2684 0.9144 0.022 Uiso 1 1 calc R . . 
H7B H 0.1278 0.2859 1.0576 0.022 Uiso 1 1 calc R . . 
C8 C -0.0710(2) 0.26629(13) 0.97826(19) 0.0299(4) Uani 1 1 d . . . 
H8A H -0.1197 0.2400 0.9034 0.045 Uiso 1 1 calc R . . 
H8B H -0.0886 0.3264 0.9749 0.045 Uiso 1 1 calc R . . 
H8C H -0.1010 0.2423 1.0485 0.045 Uiso 1 1 calc R . . 
C9 C 0.12410(18) 0.13368(11) 1.14159(14) 0.0187(4) Uani 1 1 d . . . 
H9A H 0.0986 0.0741 1.1408 0.022 Uiso 1 1 calc R . . 
H9B H 0.0607 0.1655 1.1804 0.022 Uiso 1 1 calc R . . 
C10 C 0.26610(18) 0.14441(12) 1.21589(16) 0.0237(4) Uani 1 1 d . . . 
H10A H 0.3285 0.1112 1.1794 0.036 Uiso 1 1 calc R . . 
H10B H 0.2693 0.1256 1.2996 0.036 Uiso 1 1 calc R . . 
H10C H 0.2917 0.2033 1.2164 0.036 Uiso 1 1 calc R . . 
 
loop_ 
 _atom_site_aniso_label 
 _atom_site_aniso_U_11 
 _atom_site_aniso_U_22 
 _atom_site_aniso_U_33 
 _atom_site_aniso_U_23 
 _atom_site_aniso_U_13 
 _atom_site_aniso_U_12 
Fe1 0.01450(13) 0.01298(13) 0.01288(11) -0.00083(9) 0.00179(9) -0.00081(9) 
S1 0.0151(2) 0.0197(2) 0.01297(18) -0.00063(16) 0.00196(15) -0.00108(16) 
S2 0.0155(2) 0.0223(2) 0.01371(19) -0.00062(17) 0.00104(15) -0.00097(17) 
S3 0.0191(2) 0.0138(2) 0.01469(18) 0.00087(16) 0.00457(15) 0.00066(16) 
S4 0.0203(2) 0.0140(2) 0.01430(19) 0.00090(16) 0.00437(15) 0.00042(16) 
N1 0.0147(7) 0.0183(8) 0.0177(7) -0.0008(6) 0.0038(5) 0.0006(6) 
N2 0.0188(7) 0.0138(7) 0.0145(6) -0.0007(6) 0.0039(5) -0.0004(6) 
N3 0.0180(7) 0.0244(8) 0.0181(7) -0.0022(6) 0.0027(6) 0.0011(6) 
N4 0.0163(7) 0.0157(7) 0.0178(7) -0.0021(6) 0.0045(6) 0.0007(6) 
O1 0.0496(10) 0.0223(8) 0.0627(10) 0.0125(7) 0.0361(8) 0.0052(7) 
O2 0.0380(8) 0.0261(8) 0.0366(8) 0.0004(6) 0.0180(6) 0.0093(6) 
O3 0.0193(7) 0.0397(9) 0.0362(7) -0.0117(7) 0.0002(6) -0.0039(6) 
C1 0.0152(8) 0.0142(8) 0.0158(8) -0.0012(6) 0.0031(6) 0.0032(6) 
C2 0.0152(9) 0.0186(9) 0.0246(9) -0.0016(7) 0.0003(7) -0.0027(7) 
C3 0.0190(9) 0.0293(11) 0.0310(10) 0.0021(8) 0.0011(8) 0.0035(8) 
C4 0.0192(9) 0.0247(10) 0.0190(8) 0.0029(7) 0.0063(7) -0.0013(7) 
C5 0.0298(11) 0.0243(11) 0.0304(10) 0.0051(8) -0.0012(8) -0.0017(8) 
C6 0.0111(8) 0.0152(9) 0.0168(8) 0.0003(7) 0.0013(6) -0.0019(6) 
C7 0.0255(9) 0.0132(9) 0.0177(8) -0.0014(7) 0.0056(7) -0.0007(7) 
C8 0.0272(11) 0.0223(10) 0.0391(11) 0.0072(9) 0.0043(9) 0.0042(8) 
C9 0.0233(9) 0.0189(9) 0.0142(8) -0.0011(7) 0.0046(7) 0.0017(7) 
C10 0.0274(10) 0.0206(10) 0.0207(8) -0.0022(7) -0.0011(7) 0.0007(8) 
 
_geom_special_details 
; 
 All esds (except the esd in the dihedral angle between two l.s. planes) 
 are estimated using the full covariance matrix.  The cell esds are taken 
 into account individually in the estimation of esds in distances, angles 
 and torsion angles; correlations between esds in cell parameters are only 
 used when they are defined by crystal symmetry.  An approximate (isotropic) 
 treatment of cell esds is used for estimating esds involving l.s. planes. 
; 
 
loop_ 
 _geom_bond_atom_site_label_1 
 _geom_bond_atom_site_label_2 
 _geom_bond_distance 
 _geom_bond_site_symmetry_2 
 _geom_bond_publ_flag 
Fe1 N4 1.6659(14) . ? 
Fe1 N3 1.9922(16) . ? 
Fe1 S3 2.2998(5) . ? 
Fe1 S1 2.3096(5) . ? 
Fe1 S4 2.3161(5) . ? 
Fe1 S2 2.3172(5) . ? 
S1 C1 1.7222(16) . ? 
S2 C1 1.7172(16) . ? 
S3 C6 1.7221(17) . ? 
S4 C6 1.7191(16) . ? 
N1 C1 1.315(2) . ? 
N1 C4 1.474(2) . ? 
N1 C2 1.475(2) . ? 
N2 C6 1.316(2) . ? 
N2 C7 1.474(2) . ? 
N2 C9 1.475(2) . ? 
N3 O2 1.2085(19) . ? 
N3 O1 1.256(2) . ? 
N4 O3 1.1519(18) . ? 
C2 C3 1.508(2) . ? 
C2 H2A 0.9900 . ? 
C2 H2B 0.9900 . ? 
C3 H3C 0.9800 . ? 
C3 H3D 0.9800 . ? 
C3 H3E 0.9800 . ? 
C4 C5 1.513(3) . ? 
C4 H4A 0.9900 . ? 
C4 H4B 0.9900 . ? 
C5 H5A 0.9800 . ? 
C5 H5B 0.9800 . ? 
C5 H5C 0.9800 . ? 
C7 C8 1.513(3) . ? 
C7 H7A 0.9900 . ? 
C7 H7B 0.9900 . ? 
C8 H8A 0.9800 . ? 
C8 H8B 0.9800 . ? 
C8 H8C 0.9800 . ? 
C9 C10 1.525(2) . ? 
C9 H9A 0.9900 . ? 
C9 H9B 0.9900 . ? 
C10 H10A 0.9800 . ? 
C10 H10B 0.9800 . ? 
C10 H10C 0.9800 . ? 
 
loop_ 
 _geom_angle_atom_site_label_1 
 _geom_angle_atom_site_label_2 
 _geom_angle_atom_site_label_3 
 _geom_angle 
 _geom_angle_site_symmetry_1 
 _geom_angle_site_symmetry_3 
 _geom_angle_publ_flag 
N4 Fe1 N3 91.40(7) . . ? 
N4 Fe1 S3 101.54(5) . . ? 
N3 Fe1 S3 92.82(4) . . ? 
N4 Fe1 S1 95.87(5) . . ? 
N3 Fe1 S1 98.75(4) . . ? 
S3 Fe1 S1 158.825(18) . . ? 
N4 Fe1 S4 94.26(5) . . ? 
N3 Fe1 S4 167.81(4) . . ? 
S3 Fe1 S4 75.476(16) . . ? 
S1 Fe1 S4 91.405(17) . . ? 
N4 Fe1 S2 170.53(5) . . ? 
N3 Fe1 S2 87.34(4) . . ? 
S3 Fe1 S2 87.903(16) . . ? 
S1 Fe1 S2 75.069(16) . . ? 
S4 Fe1 S2 88.793(17) . . ? 
C1 S1 Fe1 87.25(6) . . ? 
C1 S2 Fe1 87.12(6) . . ? 
C6 S3 Fe1 87.26(6) . . ? 
C6 S4 Fe1 86.80(6) . . ? 
C1 N1 C4 121.55(14) . . ? 
C1 N1 C2 121.37(14) . . ? 
C4 N1 C2 117.08(14) . . ? 
C6 N2 C7 122.07(14) . . ? 
C6 N2 C9 120.82(14) . . ? 
C7 N2 C9 117.01(13) . . ? 
O2 N3 O1 118.86(16) . . ? 
O2 N3 Fe1 124.85(13) . . ? 
O1 N3 Fe1 116.22(11) . . ? 
O3 N4 Fe1 175.89(14) . . ? 
N1 C1 S2 125.63(12) . . ? 
N1 C1 S1 124.26(12) . . ? 
S2 C1 S1 110.09(9) . . ? 
N1 C2 C3 110.64(14) . . ? 
N1 C2 H2A 109.5 . . ? 
C3 C2 H2A 109.5 . . ? 
N1 C2 H2B 109.5 . . ? 
C3 C2 H2B 109.5 . . ? 
H2A C2 H2B 108.1 . . ? 
C2 C3 H3C 109.5 . . ? 
C2 C3 H3D 109.5 . . ? 
H3C C3 H3D 109.5 . . ? 
C2 C3 H3E 109.5 . . ? 
H3C C3 H3E 109.5 . . ? 
H3D C3 H3E 109.5 . . ? 
N1 C4 C5 111.94(15) . . ? 
N1 C4 H4A 109.2 . . ? 
C5 C4 H4A 109.2 . . ? 
N1 C4 H4B 109.2 . . ? 
C5 C4 H4B 109.2 . . ? 
H4A C4 H4B 107.9 . . ? 
C4 C5 H5A 109.5 . . ? 
C4 C5 H5B 109.5 . . ? 
H5A C5 H5B 109.5 . . ? 
C4 C5 H5C 109.5 . . ? 
H5A C5 H5C 109.5 . . ? 
H5B C5 H5C 109.5 . . ? 
N2 C6 S4 124.66(13) . . ? 
N2 C6 S3 124.97(12) . . ? 
S4 C6 S3 110.37(9) . . ? 
N2 C7 C8 112.09(14) . . ? 
N2 C7 H7A 109.2 . . ? 
C8 C7 H7A 109.2 . . ? 
N2 C7 H7B 109.2 . . ? 
C8 C7 H7B 109.2 . . ? 
H7A C7 H7B 107.9 . . ? 
C7 C8 H8A 109.5 . . ? 
C7 C8 H8B 109.5 . . ? 
H8A C8 H8B 109.5 . . ? 
C7 C8 H8C 109.5 . . ? 
H8A C8 H8C 109.5 . . ? 
H8B C8 H8C 109.5 . . ? 
N2 C9 C10 111.38(15) . . ? 
N2 C9 H9A 109.4 . . ? 
C10 C9 H9A 109.4 . . ? 
N2 C9 H9B 109.4 . . ? 
C10 C9 H9B 109.4 . . ? 
H9A C9 H9B 108.0 . . ? 
C9 C10 H10A 109.5 . . ? 
C9 C10 H10B 109.5 . . ? 
H10A C10 H10B 109.5 . . ? 
C9 C10 H10C 109.5 . . ? 
H10A C10 H10C 109.5 . . ? 
H10B C10 H10C 109.5 . . ? 
 
_diffrn_measured_fraction_theta_max    0.999 
_diffrn_reflns_theta_full              26.43 
_diffrn_measured_fraction_theta_full   0.999 
_refine_diff_density_max    0.573 
_refine_diff_density_min   -0.215 
_refine_diff_density_rms    0.054 

complex 7   ===END
